# Supplementary material for: True S-cones are concentrated in the ventral mouse retina and wired for color detection in the upper visual field
Source: eLife. 2020 May 28;9:e56840. doi: 10.7554/eLife.56840 (PMC7308094; doi:10.7554/eLife.56840)
Supplement: Source data 1. [file elife-56840-data1.xlsx]

## Sheet: Source Fig1C, Suppl file1A
	Nadal-Nicolas et al., eLife 2020
	Source data Figure 1C, Supplement file 1A. Cone proportions in different dorso-ventral areas.																			Statistics from GraphPad Prism. Table S1A
																																		Statistics. Size Effect and Power
	Pigmented mice (C57BL6)																			Unpaired t test
	Dorsal retina						Medial retina						Ventral retina							Table Analyzed	Cones %													Effect Size
	#	Image	TrueS	TrueM	Mixed		#	Image	TrueS	TrueM	Mixed		#	Image	TrueS	TrueM	Mixed			Column	Dors true S-cone C57	Dors true M-cone C57	Dors Mixed C57		Med true S-cone C57	Med true M-cone C57	Med Mixed C57		Ventr true S-cone C57	Ventr true M-cone C57	Ventr Mixed C57				Dors true S-cone C57	Dors true M-cone C57	Dors Mixed C57		Med true S-cone C57	Med true M-cone C57	Med Mixed C57		Ventr true S-cone C57	Ventr true M-cone C57	Ventr Mixed C57
	1	1	3	194	1		1	13	15	0	229		1	25	82	0	192			vs.	vs.	vs.	vs.		vs.	vs.	vs.		vs.	vs.	vs.				vs.	vs.	vs.		vs.	vs.	vs.		vs.	vs.	vs.
		2	7	268	3			14	14	0	208			26	70	0	184			Column	Dors true S-cone CD1	Dors true M-cone CD1	Dors Mixed CD1		Med true S-cone CD1	Med true M-cone CD1	Med Mixed CD1		Ventr true S-cone CD1	Ventr true M-cone CD1	Ventr Mixed CD1				Dors true S-cone CD1	Dors true M-cone CD1	Dors Mixed CD1		Med true S-cone CD1	Med true M-cone CD1	Med Mixed CD1		Ventr true S-cone CD1	Ventr true M-cone CD1	Ventr Mixed CD1
		3	4	193	2			15	19	0	196			27	103	0	172
	2	4	1	183	5		2	16	20	0	395		2	28	108	0	202			Unpaired t test														https://www.socscistatistics.com/effectsize/default3.aspx
		5	1	184	5			17	29	0	244			29	123	0	232			P value	0.603	<0.0001	<0.0001		0.0502	0.2772	0.0422		0.0085	Error:See Commentary	0.9785			Cohen's d is the appropriate effect size measure if two groups have similar standard deviations and are of the same size.
		6	1	192	4			18	30	0	251			30	84	0	152			P value summary	ns	****	****		ns	ns	*		**	Since all the	ns			Glass's delta, which uses only the standard deviation of the control group, is an alternative measure if each group has a different standard deviation.
	3	7	5	249	4		3	19	15	0	289		3	31	87	0	175			Significantly different (P < 0.05)?	No	Yes	Yes		No	No	Yes		Yes	values in both	No
		8	2	244	1			20	13	0	271			32	89	0	186			One- or two-tailed P value?	Two-tailed	Two-tailed	Two-tailed		Two-tailed	Two-tailed	Two-tailed		Two-tailed	columns are identical,	Two-tailed			Cohen's d = (M2 - M1) ⁄ SDpooled
		9	5	219	1			21	31	1	223			33	98	0	185			t, df	t=0.5277, df=22	t=20.01, df=22	t=21.49, df=22		t=2.072, df=22	t=1.114, df=22	t=2.157, df=22		t=2.891, df=22	it is not possible	t=0.02721, df=22			Sdpooled
	4	10	1	191	39		4	22	20	0	221		4	34	94	0	210													to compute a t test.				Cohen's d	0.215438	8.17001	-8.77477		0.845714	-0.454887	0.880746		1.18027	#DIV/0!	0.0111086
		11	2	177	4			23	18	0	228			35	108	0	241			How big is the difference?														Glass's delta = (M2-M1)/SD12	0.167302	5.8659	-17.4567		0.942633	-2.88675	0.64425		1.11964	#DIV/0!	0.00953436
		12	2	165	6			24	18	0	210			36	107	0	222			Mean of column A	2.833	204.9	6.25		20.17	0.08333	247.1		96.08		196.1
	X		2.83333	204.917	6.25				20.1667	0.0833333	247.083				96.0833	0	196.083			Mean of column D	2.5	14.75	188.8		14.17	0.9167	212.5		79.75		195.8
	SD		1.99241	32.419	10.4544				6.36515	0.288675	53.68				14.588	0	26.2209			Difference between means (D - A) ± SEM	-0.3333 ± 0.6317	-190.2 ± 9.502	182.5 ± 8.491		-6.000 ± 2.896	0.8333 ± 0.7479	-34.58 ± 16.03		-16.33 ± 5.650		-0.2500 ± 9.188
	Sum		34	2459	75				242	1	2965				1153	0	2353			95% confidence interval	-1.643 to 0.9766	-209.9 to -170.5	164.9 to 200.1		-12.01 to 0.006679	-0.7177 to 2.384	-67.83 to -1.339		-28.05 to -4.617		-19.30 to 18.80			Power	0.0678013	1	1		0.597727	0.9999	0.32642		0.745788	NA	0.0500572
	Total		2568						3208						3506			Plot		R squared (eta squared)	0.0125	0.9479	0.9545		0.1632	0.05342	0.1746		0.2753		3.365e-05
	%		1.32399	95.7555	2.92056				7.54364	0.0311721	92.4252				32.8865	0	67.1135	Central circle
			S+	M+					S+	M+					S+	M+				F test to compare variances
	Subtotal		109	2534					3207	2966					3506	2353				F, DFn, Dfd	4.852, 11, 11	32.27, 11, 11	6.916, 11, 11		1.485, 11, 11	79.55, 11, 11	14.26, 11, 11		1.250, 11, 11		2.113, 11, 11
	Sub %	True cone	31.1927	97.0403				True cone	7.54599	0.0337154				True cone	0.328865	0		Outer Rins		P value	0.0144	<0.0001	0.0033		0.5231	<0.0001	0.0001		0.7175		0.2305
		Mixed	68.8073	2.95975				Mixed	92.454	99.9663				Mixed	0.671135	100				P value summary	*	****	**		ns	****	***		ns		ns
	Total		9282																	Significantly different (P < 0.05)?	Yes	Yes	Yes		No	Yes	Yes		No	No	No
																				Data analyzed
	Albino mice (CD1)																			Sample size, column A	12	12	12		12	12	12		12	12	12
	Dorsal retina						Medial retina						Ventral retina							Sample size, column D	12	12	12		12	12	12		12	12	12
	#	Image	TrueS	TrueM	Mixed		#	Image	TrueS	TrueM	Mixed		#	Image	TrueS	TrueM	Mixed
	1	1	4	6	184		1	13	10	0	218		1	25	85	0	203
		2	3	11	236			14	11	0	209			26	85	0	201
		3	2	15	193			15	5	9	214			27	73	0	236
	2	4	3	12	224		2	16	9	0	205		2	28	81	0	177
		5	3	13	219			17	12	0	199			29	81	0	209
		6	1	8	179			18	16	0	211			30	97	0	172
	3	7	2	13	148		3	19	13	1	234		3	31	72	0	202
		8	3	14	187			20	8	1	242			32	45	0	197
		9	3	18	154			21	9	0	210			33	92	0	193
	4	10	1	22	202		4	22	30	0	195		4	34	77	0	169
		11	3	26	169			23	27	0	196			35	84	0	199
		12	2	19	170			24	20	0	217			36	85	0	192
	X		2.5	14.75	188.75				14.1667	0.916667	212.5				79.75	0	195.833
	SD		0.904534	5.70685	27.4926				7.75574	2.57464	14.2159				13.0462	0	18.0395
	Sum		30	177	2265				170	11	2550				957	0	2350
	Total		2472						2731						3307			Plot
	%		1.21359	7.16019	91.6262				6.22483	0.402783	93.3724				28.9386	0	71.0614	Central circle
			S+	M+					S+	M+					S+	M+
	Subtotal		2295	2442					2720	2561					3307	2350
	Sub %	True cone	1.30719	7.24816				True cone	6.25	0.42952				True cone	28.9386	0		Outer Rins
		Mixed	98.6928	92.7518				Mixed	93.75	99.5705				Mixed	71.0614	100
	Total		8510

## Sheet: Source Fig2B, Suppl file1B
	Nadal-Nicolas et al., eLife 2020
																								Pig (C57)
	Source data Figure 2, Supplement file 1B. Whole population of Cones in whole mount retinas.																			Statistics from GraphPad Prism. Fig 2B, table S1B				Alb (CD1)										Statistics from GraphPad Prism. Fig 2B, table S1B								Statistics. Size Effect and Power
																				Normality and Lognormality test	Cones													Unpaired t test
																					All C57	All CD1	M C57	M CD1	S C57	S CD1	Mixed C57	Mixed CD1	TruLM C57	TruLM CD1	TrueS C57	True CD1		Table Analyzed	Total number of cones
		All cones			M-opsin			S-opsin			Mixed-cone			True M-cone			True S-cone			Number of values	8	8	8	8	8	8	8	8	8	8	8	8		Column A	All C57	M C57	S C57	Mixed C57	TrueLM C57	TrueS C57		Effect Size		All C57	M C57	S C57	Mixed C57	TrueLM C57	TrueS C57
	#	Pig (C57)	Alb (CD1)		Pig	Alb		Pig	Alb		Pig	Alb		Pig	Alb		Pig	Alb																vs	vs	vs.	vs	vs.	vs	vs				vs	vs.	vs	vs.	vs	vs
	1	177874	145049		157783	132397		108793	139456		95981	127724		68579	3429		17932	14483		Minimum	162744	135836	146179	123127	103616	128020	87646	110978	55220	2946	15194	13499		Column B	All CD1	M CD1	S CD1	Mixed CD1	TrueLM CD1	True CD1				All CD1	M CD1	S CD1	Mixed CD1	TrueLM CD1	True CD1
	2	178482	145953		162092	133873		106702	140449		93609	130894		67695	2946		20951	14357		25% Percentile	168992	143194	152081	124476	106716	130825	93139	111848	61151	3378	16935	13753
	3	174826	142576		158119	123127		115602	129870		95220	116732		61927	5682		16828	14633		Median	176012	145406	156195	131310	107833	135794	94415	124740	64720	4019	18299	14444		Unpaired t test								Cohen's d		5.18695	5.03309	5.32714	4.30966	17.2302	2.87635
	4	183332	145719		165403	132040		116813	133690		96630	122727		67513	4020		20626	13552		75% Percentile	178330	148387	161099	133422	114552	140201	96468	128054	68250	4984	20539	14609		P value	< 0.0001	<0.0001	< 0.0001	<0.0001	< 0.0001	< 0.0001		Glass's delta		4.3846	4.39269	5.61011	5.99522	12.4091	2.13191
	5	169078	149888		153694	133764		103616	142389		87646	128164		61558	3361		18725	14537		Maximum	183332	149888	165403	133873	116813	142389	103809	130894	68579	5682	20951	15464		P value summary	***	****	***	****	***	***
	6	177198	149198		151543	127411		106873	134018		93492	110978		68435	5166		20276	15464																Are means signif. different? (P < 0.05)	Yes	Yes	Yes	Yes	Yes	Yes		https://www.socscistatistics.com/effectsize/default3.aspx
	7	168963	145093		154607	130579		111401	137570		103809	126753		61015	4439		15194	13499		Mean	174062	144914	156178	129586	109570	135683	94926	121425	63993	4133	18466	14366		One- or two-tailed P value?	Two-tailed	Two-tailed	Two-tailed	Two-tailed	Two-tailed	Two-tailed		Cohen's d is the appropriate effect size measure if two groups have similar standard deviations and are of the same size.
	8	162744	135836		146179	123497		106758	128020		93021	112539		55220	4017		18333	14404		Std. Deviation	6648	4355	6054	4380	4655	5137	4527	8359	4824	932.5	2036	625.1		t, df	t=10.37 df=14	t=10.07, df=14	t=10.65 df=14	t=7.884, df=14	t=34.46 df=14	t=5.444 df=14		Glass's delta, which uses only the standard deviation of the control group, is an alternative measure if each group has a different standard deviation.
	X	174062	144914		156178	129586		109570	135683		94926	122064		63992.8	4132.5		18608.1	14366.1		Std. Error of Mean	2350	1540	2140	1548	1646	1816	1600	2955	1706	329.7	720	221
	SD	6647.84	4354.76		6053.58	4379.65		4654.63	5137.24		4526.57	7669.01		4823.89	932.502		1989.77	625.144																How big is the difference?
	%	100	100		89.7251	89.4227		62.9486	93.6298		54.5357	84.2319		36.7643	2.85169		10.6905	9.91355		Lower 95% CI of mean	168504	141273	151117	125925	105678	131388	91142	114436	59960	3353	16763	13843		Mean ± SEM of column A	174100 ± 2350 N=8	156178	109600 ± 1646 N=8	94926	63990 ± 1706 N=8	18470 ± 720.0 N=8		Power		1	1	1	1	1	1
																				Upper 95% CI of mean	179620	148555	161238	133247	113461	139978	98710	128413	68026	4912	20169	14889		Mean ± SEM of column B	144900 ± 1540 N=8	129586	135700 ± 1816 N=8	121425	4133 ± 329.7 N=8	14370 ± 221.0 N=8
																																		Difference between means	29150 ± 2810	26592 ± 2642	-26110 ± 2451	-26499 ± 3361	59860 ± 1737	4100 ± 753.2		Cohen's d = (M2 - M1) ⁄ SDpooled
																				Sum	1392497	1159312	1249420	1036688	876558	1085462	759408	971397	511942	33060	147728	114929		95% confidence interval	23120 to 35180	20926 to 32257	-31370 to -20860	-33707 to -19290	56130 to 63590	2484 to 5715		Sdpooled	√[(s12+ s22) / 2]
																																		R squared	0.8849	0.8786	0.8902	0.8162	0.9883	0.6791		Cohen's d		5.18696	5.03309	-5.32714	-4.30967	17.2302	2.87635
																				D'Agostino & Pearson normality test
																				K2	0.4258	5.32	0.03609	1.752	0.958	0.9321	3.115	3.721	1.04	0.6423	0.5164	0.3722		F test to compare variances								Glass's delta = (M2-M1)/SD12
																				P value	0.8083	0.07	0.9821	0.4165	0.6194	0.6275	0.2106	0.1556	0.5945	0.7253	0.7724	0.8302		F,DFn, Dfd	2.330, 7, 7	1.910, 7, 7	1.218, 7, 7	3.410, 7, 7	26.76, 7, 7	10.61, 7, 7		Glass's delta		4.3846	4.39269	-5.61011	-5.99524	12.4091	2.13191
																				Passed normality test (alpha=0.05)?	Yes	Yes	Yes	Yes	Yes	Yes	Yes	Yes	Yes	Yes	Yes	Yes		P value	0.2868	0.4124	0.8013	0.1279	0.0003	0.0059
																				P value summary	ns	ns	ns	ns	ns	ns	ns	ns	ns	ns	ns	ns		P value summary	ns	ns	ns	ns	***	**
																																		Are variances significantly different?	No	No	No	No	Yes	Yes
																																		Data analyzed
																																		Sample size, column A	8	8	8	8	8	8
																																		Sample size, column B	8	8	8	8	8	8

## Sheet: Source Fig2C
	Nadal-Nicolas et al., eLife 2020
	Source data Figure 2C. Cones profile per quadrants in whole mount retinas.
	Number of cones/ON distance				ON	Distance from ON (mm)																						ON	Distance from ON (mm)
					0	0.15	0.3	0.45	0.6	0.75	0.9	1.05	1.2	1.35	1.5	1.65	1.8	1.95	2.1	2.25	2.4	2.55						0	0.15	0.3	0.45	0.6	0.75	0.9	1.05	1.2	1.35	1.5	1.65	1.8	1.95	2.1	2.25	2.4	2.55
			Quadrant	#																						Quadrant	#
	Mixed	C57 (Pig)	DT	1	0	1111	1798	1665	750	377	304	369	411	376	327	283	175	109	58	32	7	0		TrueM	C57	DT	1	0	0	10	295	1372	2265	2711	3049	3441	3574	3913	3891	3501	2701	1479	718	106	0		TrueS	C57	DT
				2	0	11	242	777	966	699	678	641	634	558	531	466	489	428	264	143	6	0					2	0	0	1	1	27	256	1018	1728	2372	2737	2856	3095	3655	4517	4764	3088	273	0
				3	0	1228	1829	1525	808	425	389	363	360	323	292	271	132	129	57	20	0	0					3	0	2	19	450	1661	2555	2899	3202	3500	3714	3482	3095	2573	1559	817	391	1	0
				4	0	879	1465	1697	1270	718	490	480	402	348	336	268	236	135	105	48	8	1					4	0	7	11	42	512	1545	1887	2521	2795	2834	3087	3233	3142	2645	1819	849	254	49
				X	0	807.25	1333.5	1416	948.5	554.75	465.25	463.25	451.75	401.25	371.5	322	258	200.25	121	60.75	5.25	0.25					X	0	2.25	10.25	197	893	1655.25	2128.75	2625	3027	3214.75	3334.5	3328.5	3217.75	2855.5	2219.75	1261.5	158.5	12.25
			DN	1	0	70	448	1366	1953	1869	1713	1710	1616	1531	1443	1368	1295	1270	1067	699	290	0				DN	1	0	0	0	0	12	180	603	1057	1430	1810	2139	2526	2986	3813	4047	3384	887	9				DN
				2	0	896	1755	2059	1451	1228	1000	921	741	631	598	481	286	127	54	39	0	0					2	0	1	11	87	682	1533	2147	2562	2744	2917	3086	3246	2752	1785	736	244	23	0
				3	0	102	653	1479	2051	2088	1940	1940	1809	1487	1312	1239	1036	872	623	137	0	0					3	0	0	0	3	80	443	1025	1439	1829	2119	2594	2916	3634	4493	3376	770	0	0
				4	0	47	318	956	1763	1957	1855	1776	1705	1493	1241	1100	1103	875	591	343	194	42					4	0	0	0	0	15	310	705	1037	1551	1828	2050	2272	2548	2707	3363	3209	1854	363
				X	0	278.75	793.5	1465	1804.5	1785.5	1627	1586.75	1467.75	1285.5	1148.5	1047	930	786	583.75	304.5	121	10.5					X	0	0.25	2.75	22.5	197.25	616.5	1120	1523.75	1888.5	2168.5	2467.25	2740	2980	3199.5	2880.5	1901.75	691	93
			VT	1	0	1022	1785	2388	2655	2739	2930	2925	2716	2583	2441	2346	2030	1661	968	610	164	0				VT	1	0	0	2	2	59	196	424	683	861	977	1035	1097	1185	850	506	231	1	0				VT
				2	0	42	415	1217	1720	2123	2699	3043	3076	3039	2893	2859	3093	3502	2032	257	0	0					2	0	1	1	4	15	14	52	236	384	685	983	1159	1300	915	576	84	0	0
				3	0	1339	2256	2683	2896	3344	3373	3423	3381	3227	2918	2572	2081	1097	486	93	0	0					3	0	0	2	1	5	47	137	263	327	426	671	874	925	932	522	223	26	0
				4	0	906	1709	2106	2439	2786	3094	3212	3254	3102	2766	2360	1768	1066	514	231	12	0					4	0	7	16	52	19	23	7	65	188	238	405	484	560	635	486	138	74	0
				X	0	827.25	1541.25	2098.5	2427.5	2748	3024	3150.75	3106.75	2987.75	2754.5	2534.25	2243	1831.5	1000	297.75	44	0					X	0	2	5.25	14.75	24.5	70	155	311.75	440	581.5	773.5	903.5	992.5	833	522.5	169	25.25	0
			VN	1	0	53	270	823	1501	2065	2501	2916	3083	3311	3555	3496	3646	3616	3230	1991	491	0				VN	1	0	0	0	0	0	0	0	1	0	0	3	2	1	1	5	4	5	0				VN
				2	0	996	1854	2264	2864	3638	4335	4547	4311	4388	4280	4240	3345	1554	535	5	0	0					2	0	0	0	0	0	0	1	9	8	11	15	17	41	29	36	3	1	0
				3	0	83	587	1284	1930	2456	3207	3728	3956	4147	3924	3849	3851	4252	3492	667	4	0					3	0	0	0	0	0	1	4	9	9	2	2	3	7	17	21	11	0	0
				4	0	26	250	691	1275	1734	2165	2651	3084	3265	3434	3619	3701	3958	3385	1750	138	0					4	0	0	1	0	1	2	0	0	11	11	12	6	15	18	24	19	11	0
				X	0	289.5	740.25	1265.5	1892.5	2473.25	3052	3460.5	3608.5	3777.75	3798.25	3801	3635.75	3345	2660.5	1103.25	158.25	0					X	0	0	0.25	0	0.25	0.75	1.25	4.75	7	6	8	7	16	16.25	21.5	9.25	4.25	0
		CD1 (Alb)	DT	1	0	978	1711	2168	2512	2584	2636	2732	2804	2773	2590	2137	1219	553	137	11	1	0			CD1	DT	1	0	0	3	2	9	42	103	160	231	253	275	196	159	81	39	13	2	0			CD1	DT
				2	0	855	1680	2071	2331	2545	2613	2671	2763	2979	2877	2826	1884	984	374	202	41	0					2	0	0	0	4	9	30	45	104	171	238	315	319	298	233	77	23	3	0
				3	0	985	1757	2125	2391	2494	2574	2757	2642	2546	2409	1979	1434	822	341	96	0	0					3	0	0	0	2	24	56	140	239	328	453	461	540	480	262	98	11	2	0
				4	0	930	1392	1885	2122	2442	2644	2790	2833	2858	2672	2562	2240	1488	691	185	57	4					4	0	0	1	5	27	66	123	172	257	331	366	360	300	280	189	63	7	0
				X	0	937	1635	2062.25	2339	2516.25	2616.75	2737.5	2760.5	2789	2637	2376	1694.25	961.75	385.75	123.5	24.75	1					X	0	0	1	3.25	17.25	48.5	102.75	168.75	246.75	318.75	354.25	353.75	309.25	214	100.75	27.5	3.5	0
			DN	1	0	53	301	687	1230	1683	2070	2489	2888	3288	3712	4419	4823	4502	2906	1721	349	16				DN	1	0	0	0	0	0	9	29	60	122	156	229	241	242	161	97	33	10	2				DN
				2	0	16	196	606	972	1224	1597	1795	2210	2501	2792	3475	4129	4769	4808	3108	968	69					2	0	0	0	0	5	12	38	56	102	139	220	252	272	176	88	32	4	1
				3	0	39	273	646	1014	1321	1729	2037	2283	2579	2941	3273	3717	3752	2848	1184	70	1					3	0	0	0	0	0	1	10	50	122	221	267	314	358	287	94	13	0	0
				4	0	69	302	690	1095	1455	1724	2030	2326	2695	2804	2901	2652	2147	1891	1703	982	93					4	0	0	0	0	18	54	86	122	163	197	301	276	242	163	100	33	6	0
				X	0	44.25	268	657.25	1077.75	1420.75	1780	2087.75	2426.75	2765.75	3062.25	3517	3830.25	3792.5	3113.25	1929	592.25	44.75					X	0	0	0	0	5.75	19	40.75	72	127.25	178.25	254.25	270.75	278.5	196.75	94.75	27.75	5	0.75
			VT	1	0	1069	1792	2129	2539	3006	3219	3301	3325	3247	3118	2970	2505	1569	469	65	1	0				VT	1	0	0	0	0	0	3	4	14	49	46	69	54	102	58	29	11	7	0				VT
				2	0	928	1643	2023	2180	2453	2576	2953	2964	3009	2763	2592	1770	726	215	8	0	0					2	0	0	0	0	1	0	0	3	3	5	8	16	13	18	18	6	0	0
				3	0	929	1569	2029	2343	2608	2759	2869	2968	2931	2732	2594	2288	1811	913	232	1	0					3	0	0	0	1	0	0	3	11	60	90	122	122	135	135	116	42	6	0
				4	0	804	1263	1909	2295	2526	2714	2937	3255	3533	3757	3898	3605	2877	1782	758	93	15					4	0	0	0	0	0	0	0	0	0	0	0	1	7	31	38	38	0	0
				X	0	932.5	1566.75	2022.5	2339.25	2648.25	2817	3015	3128	3180	3092.5	3013.5	2542	1745.75	844.75	265.75	23.75	3.75					X	0	0	0	0.25	0.25	0.75	1.75	7	28	35.25	49.75	48.25	64.25	60.5	50.25	24.25	3.25	0
			VN	1	0	61	338	690	1054	1517	2023	2345	2430	2737	2867	3245	3162	2679	2045	1048	46	0				VN	1	0	0	0	0	0	1	1	0	2	2	2	2	3	1	1	2	1	0				VN
				2	0	30	299	699	1162	1551	1973	2319	2660	2804	3186	3738	4379	4627	3370	1208	151	0					2	0	0	0	0	0	0	0	0	0	0	0	0	1	0	0	0	0	0
				3	0	40	282	578	884	1286	1681	1979	2456	2837	3030	3258	3129	2704	2182	1315	150	0					3	0	0	0	0	0	0	0	0	0	0	0	1	1	0	0	0	0	0
				4	0	73	297	680	911	1253	1656	2008	2246	2513	2716	3120	3777	3478	2646	1764	1494	15					4	0	0	0	0	0	0	0	0	0	0	0	0	0	0	0	0	0	0
				X	0	51	304	661.75	1002.75	1401.75	1833.25	2162.75	2448	2722.75	2949.75	3340.25	3611.75	3372	2560.75	1333.75	460.25	3.75					X	0	0	0	0	0	0.25	0.25	0	0.5	0.5	0.5	0.75	1.25	0.25	0.25	0.5	0.25	0
	Pig. Averages				ON	Distance from ON (mm)																		Alb. Averages				ON	Distance from ON (mm)
					0	0.15	0.3	0.45	0.6	0.75	0.9	1.05	1.2	1.35	1.5	1.65	1.8	1.95	2.1	2.25	2.4	2.55						0	0.15	0.3	0.45	0.6	0.75	0.9	1.05	1.2	1.35	1.5	1.65	1.8	1.95	2.1	2.25	2.4	2.55
		Quadrant																						Quadrant
	C57 (Pig)	DT	Mixed		0	807.25	1333.5	1416	948.5	554.75	465.25	463.25	451.75	401.25	371.5	322	258	200.25	121	60.75	5.25	0.25		CD1 (Alb)	DT	Mixed		0	937	1635	2062.25	2339	2516.25	2616.75	2737.5	2760.5	2789	2637	2376	1694.25	961.75	385.75	123.5	24.75	1
			TrueLM		0	2.25	10.25	197	893	1655.25	2128.75	2625	3027	3214.75	3334.5	3328.5	3217.75	2855.5	2219.75	1261.5	158.5	12.25				TrueLM		0	0	1	3.25	17.25	48.5	102.75	168.75	246.75	318.75	354.25	353.75	309.25	214	100.75	27.5	3.5	0
			TrueS		0	23.5	34.75	49	52.75	55.5	58.5	48.75	44	49.25	44.5	40.25	40.5	35	31.75	21	1	0.25				TrueS		0	28.5	43	55.75	60	62.75	46.75	46	53	56	51	40	41	30.5	20	8.25	1.5	0
			Mx+TrM+TrS		0	833	1378.5	1662	1894.25	2265.5	2652.5	3137	3522.75	3665.25	3750.5	3690.75	3516.25	3090.75	2372.5	1343.25	164.75	12.75				Mx+TrM+TrS		0	965.5	1679	2121.25	2416.25	2627.5	2766.25	2952.25	3060.25	3163.75	3042.25	2769.75	2044.5	1206.25	506.5	159.25	29.75	1
		DN	Mixed		0	278.75	793.5	1465	1804.5	1785.5	1627	1586.75	1467.75	1285.5	1148.5	1047	930	786	583.75	304.5	121	10.5			DN	Mixed		0	44.25	268	657.25	1077.75	1420.75	1780	2087.75	2426.75	2765.75	3062.25	3517	3830.25	3792.5	3113.25	1929	592.25	44.75
			TrueLM		0	0.25	2.75	22.5	197.25	616.5	1120	1523.75	1888.5	2168.5	2467.25	2740	2980	3199.5	2880.5	1901.75	691	93				TrueLM		0	0	0	0	5.75	19	40.75	72	127.25	178.25	254.25	270.75	278.5	196.75	94.75	27.75	5	0.75
			TrueS		0	46.25	92.75	122.25	135.75	131.75	102.25	95.5	95.25	86	95.75	86.5	77.5	72.75	57	43.25	21.75	1.75				TrueS		0	9	45.75	93	115.5	125.5	110.5	120.5	103.75	113	113	106.75	100	75	59.5	35.25	18	1
			Mx+TrM+TrS		0	325.25	889	1609.75	2137.5	2533.75	2849.25	3206	3451.5	3540	3711.5	3873.5	3987.5	4058.25	3521.25	2249.5	833.75	105.25				Mx+TrM+TrS		0	53.25	313.75	750.25	1199	1565.25	1931.25	2280.25	2657.75	3057	3429.5	3894.5	4208.75	4064.25	3267.5	1992	615.25	46.5
		VT	Mixed		0	827.25	1541.25	2098.5	2427.5	2748	3024	3150.75	3106.75	2987.75	2754.5	2534.25	2243	1831.5	1000	297.75	44	0			VT	Mixed		0	932.5	1566.75	2022.5	2339.25	2648.25	2817	3015	3128	3180	3092.5	3013.5	2542	1745.75	844.75	265.75	23.75	3.75
			TrueLM		0	2	5.25	14.75	24.5	70	155	311.75	440	581.5	773.5	903.5	992.5	833	522.5	169	25.25	0				TrueLM		0	0	0	0.25	0.25	0.75	1.75	7	28	35.25	49.75	48.25	64.25	60.5	50.25	24.25	3.25	0
			TrueS		0	33.5	83	132.75	208.75	312.5	384.5	470.5	479.25	477.75	463.75	439.5	365.5	315.5	267	86.5	13.5	0				TrueS		0	29.5	80.25	154.75	263.75	346.75	431.25	499.5	459.25	436	395	374.75	338	269.75	199.25	64.25	3.75	0
			Mx+TrM+TrS		0	862.75	1629.5	2246	2660.75	3130.5	3563.5	3933	4026	4047	3991.75	3877.25	3601	2980	1789.5	553.25	82.75	0				Mx+TrM+TrS		0	962	1647	2177.5	2603.25	2995.75	3250	3521.5	3615.25	3651.25	3537.25	3436.5	2944.25	2076	1094.25	354.25	30.75	3.75
		VN	Mixed		0	289.5	740.25	1265.5	1892.5	2473.25	3052	3460.5	3608.5	3777.75	3798.25	3801	3635.75	3345	2660.5	1103.25	158.25	0			VN	Mixed		0	51	304	661.75	1002.75	1401.75	1833.25	2162.75	2448	2722.75	2949.75	3340.25	3611.75	3372	2560.75	1333.75	460.25	3.75
			TrueLM		0	0	0.25	0	0.25	0.75	1.25	4.75	7	6	8	7	16	16.25	21.5	9.25	4.25	0				TrueLM		0	0	0	0	0	0.25	0.25	0	0.5	0.5	0.5	0.75	1.25	0.25	0.25	0.5	0.25	0
			TrueS		0	66	169.25	296	436.75	590.75	739	920.5	1004.25	1067.5	1154	1131	1099.75	962.5	888	438.25	102.25	0				TrueS		0	14.75	98	208.75	323.25	454.75	597	690.75	733.25	788.5	781	772	707.75	577.5	368.5	143	34.75	0.25
			Mx+TrM+TrS		0	355.5	909.75	1561.5	2329.5	3064.75	3792.25	4385.75	4619.75	4851.25	4960.25	4939	4751.5	4323.75	3570	1550.75	264.75	0				Mx+TrM+TrS		0	65.75	402	870.5	1326	1856.75	2430.5	2853.5	3181.75	3511.75	3731.25	4113	4320.75	3949.75	2929.5	1477.25	495.25	4
					ON	Distance from ON (mm)																						ON	Distance from ON (mm)
	Pig. %				0	0.15	0.3	0.45	0.6	0.75	0.9	1.05	1.2	1.35	1.5	1.65	1.8	1.95	2.1	2.25	2.4	2.55		Alb. %				0	0.15	0.3	0.45	0.6	0.75	0.9	1.05	1.2	1.35	1.5	1.65	1.8	1.95	2.1	2.25	2.4	2.55
	C57 (Pig)	DT	Mixed		#DIV/0!	96.9088	96.7356	85.1986	50.0726	24.4869	17.5401	14.7673	12.8238	10.9474	9.90535	8.72451	7.33736	6.47901	5.10011	4.52261	3.18665	1.96078		CD1 (Alb)	DT	Mixed		#DIV/0!	97.0482	97.3794	97.2186	96.8029	95.7659	94.5956	92.7259	90.205	88.1549	86.6793	85.7839	82.8687	79.7306	76.1599	77.551	83.1933	100
			TrueLM		#DIV/0!	0.270108	0.743562	11.8532	47.1427	73.0633	80.2545	83.6787	85.9272	87.7089	88.9081	90.1849	91.5108	92.3886	93.5616	93.914	96.2064	96.0784				TrueLM		#DIV/0!	0	0.0595593	0.153212	0.713916	1.84586	3.71441	5.71598	8.06307	10.0751	11.6443	12.7719	15.1259	17.7409	19.8914	17.2684	11.7647	0
			TrueS		#DIV/0!	2.82113	2.52086	2.94826	2.78474	2.44979	2.20547	1.55403	1.24902	1.3437	1.18651	1.09056	1.1518	1.13241	1.33825	1.56337	0.60698	1.96078				TrueS		#DIV/0!	2.95184	2.56105	2.62817	2.48319	2.3882	1.69001	1.55813	1.73188	1.77005	1.67639	1.44417	2.00538	2.5285	3.94867	5.18053	5.04202	0
			Mx+TrM+TrS		#DIV/0!	100	100	100	100	100	100	100	100	100	100	100	100	100	100	100	100	100				Mx+TrM+TrS		#DIV/0!	100	100	100	100	100	100	100	100	100	100	100	100	100	100	100	100	100
		DN	Mixed		#DIV/0!	85.7033	89.2576	91.0079	84.4211	70.4687	57.1027	49.4931	42.525	36.3136	30.9444	27.0298	23.3229	19.368	16.5779	13.5363	14.5127	9.97625			DN	Mixed		#DIV/0!	83.0986	85.4183	87.6041	89.8874	90.7682	92.1683	91.5579	91.3084	90.4727	89.2914	90.3068	91.0068	93.3136	95.2793	96.8373	96.2617	96.2366
			TrueLM		#DIV/0!	0.076864	0.309336	1.39773	9.22807	24.3315	39.3086	47.5281	54.7153	61.2571	66.4758	70.7371	74.7335	78.8394	81.8033	84.541	82.8786	88.361				TrueLM		#DIV/0!	0	0	0	0.479566	1.21386	2.11003	3.15755	4.78788	5.83088	7.41362	6.95211	6.61717	4.84099	2.89977	1.39307	0.812678	1.6129
			TrueS		#DIV/0!	14.2198	10.4331	7.59435	6.35088	5.1998	3.58866	2.97879	2.75967	2.42938	2.57982	2.23312	1.94357	1.79264	1.61874	1.92265	2.6087	1.66271				TrueS		#DIV/0!	16.9014	14.5817	12.3959	9.63303	8.01789	5.72168	5.28451	3.90368	3.69643	3.29494	2.74105	2.376	1.84536	1.82096	1.76958	2.92564	2.15054
			Mx+TrM+TrS		#DIV/0!	100	100	100	100	100	100	100	100	100	100	100	100	100	100	100	100	100				Mx+TrM+TrS		#DIV/0!	100	100	100	100	100	100	100	100	100	100	100	100	100	100	100	100	100
		VT	Mixed		#DIV/0!	95.8853	94.5842	93.4328	91.2337	87.7815	84.8604	80.1106	77.1672	73.8263	69.0048	65.362	62.2883	61.4597	55.8815	53.8183	53.1722	#DIV/0!			VT	Mixed		#DIV/0!	96.9335	95.1275	92.8817	89.8588	88.4002	86.6769	85.6169	86.5224	87.0935	87.4267	87.691	86.3378	84.092	77.199	75.0176	77.2358	100
			TrueLM		#DIV/0!	0.231817	0.322185	0.656723	0.920793	2.23606	4.34966	7.92652	10.929	14.3687	19.3775	23.3026	27.5618	27.953	29.1981	30.5468	30.5136	#DIV/0!				TrueLM		#DIV/0!	0	0	0.0114811	0.00960338	0.0250355	0.0538462	0.198779	0.774497	0.965423	1.40646	1.40404	2.18222	2.91426	4.59219	6.84545	10.5691	0
			TrueS		#DIV/0!	3.88293	5.09359	5.91051	7.84553	9.98243	10.79	11.9629	11.9039	11.805	11.6177	11.3354	10.15	10.5872	14.9204	15.6349	16.3142	#DIV/0!				TrueS		#DIV/0!	3.06653	4.8725	7.10677	10.1316	11.5747	13.2692	14.1843	12.7031	11.9411	11.1669	10.905	11.48	12.9937	18.2088	18.1369	12.1951	0
			Mx+TrM+TrS		#DIV/0!	100	100	100	100	100	100	100	100	100	100	100	100	100	100	100	100	#DIV/0!				Mx+TrM+TrS		#DIV/0!	100	100	100	100	100	100	100	100	100	100	100	100	100	100	100	100	100
		VN	Mixed		#DIV/0!	81.4346	81.3685	81.0439	81.2406	80.6999	80.4799	78.9033	78.1103	77.8717	76.5738	76.9589	76.5179	77.3634	74.5238	71.143	59.7734	#DIV/0!			VN	Mixed		#DIV/0!	77.5665	75.6219	76.0195	75.6222	75.4948	75.4269	75.7929	76.9388	77.5326	79.0553	81.212	83.5908	85.3725	87.4125	90.286	92.9329	93.75
			TrueLM		#DIV/0!	0	0.0274801	0	0.0107319	0.0244718	0.032962	0.108305	0.151523	0.123679	0.161282	0.141729	0.336736	0.375831	0.602241	0.596486	1.60529	#DIV/0!				TrueLM		#DIV/0!	0	0	0	0	0.0134644	0.0102859	0	0.0157146	0.0142379	0.0134003	0.0182349	0.0289302	0.00632951	0.00853388	0.0338467	0.0504796	0
			TrueS		#VALUE!	18.5654	18.604	18.9561	18.7487	19.2756	19.4871	20.9884	21.7382	22.0046	23.265	22.8994	23.1453	22.2608	24.8739	28.2605	38.6213	#DIV/0!				TrueS		#VALUE!	22.4335	24.3781	23.9805	24.3778	24.4917	24.5628	24.2071	23.0455	22.4532	20.9313	18.7698	16.3803	14.6212	12.5789	9.68015	7.01666	6.25
			Mx+TrM+TrS		#DIV/0!	100	100	100	100	100	100	100	100	100	100	100	100	100	100	100	100	#DIV/0!				Mx+TrM+TrS		#DIV/0!	100	100	100	100	100	100	100	100	100	100	100	100	100	100	100	100	100
	Plotting cones % per				Distance from ON (mm)																	ON	Distance from ON (mm)
	retinal quadrants				-2.55	-2.4	-2.25	-2.1	-1.95	-1.8	-1.65	-1.5	-1.35	-1.2	-1.05	-0.9	-0.75	-0.6	-0.45	-0.3	-0.15	0	0.15	0.3	0.45	0.6	0.75	0.9	1.05	1.2	1.35	1.5	1.65	1.8	1.95	2.1	2.25	2.4	2.55
	C57 (Pig)	DT	Mixed		1.96078	3.18665	4.52261	5.10011	6.47901	7.33736	8.72451	9.90535	10.9474	12.8238	14.7673	17.5401	24.4869	50.0726	85.1986	96.7356	96.9088	0
			TrueLM		96.0784	96.2064	93.914	93.5616	92.3886	91.5108	90.1849	88.9081	87.7089	85.9272	83.6787	80.2545	73.0633	47.1427	11.8532	0.743562	0.270108	0
			TrueS		1.96078	0.60698	1.56337	1.33825	1.13241	1.1518	1.09056	1.18651	1.3437	1.24902	1.55403	2.20547	2.44979	2.78474	2.94826	2.52086	2.82113	0
		DN	Mixed																			0	85.7033	89.2576	91.0079	84.4211	70.4687	57.1027	49.4931	42.525	36.3136	30.9444	27.0298	23.3229	19.368	16.5779	13.5363	14.5127	9.97625
			TrueLM																			0	0.076864	0.309336	1.39773	9.22807	24.3315	39.3086	47.5281	54.7153	61.2571	66.4758	70.7371	74.7335	78.8394	81.8033	84.541	82.8786	88.361
			TrueS																			0	14.2198	10.4331	7.59435	6.35088	5.1998	3.58866	2.97879	2.75967	2.42938	2.57982	2.23312	1.94357	1.79264	1.61874	1.92265	2.6087	1.66271
		VT	Mixed		#DIV/0!	-53.1722	-53.8183	-55.8815	-61.4597	-62.2883	-65.362	-69.0048	-73.8263	-77.1672	-80.1106	-84.8604	-87.7815	-91.2337	-93.4328	-94.5842	-95.8853	0
			TrueLM		#DIV/0!	-30.5136	-30.5468	-29.1981	-27.953	-27.5618	-23.3026	-19.3775	-14.3687	-10.929	-7.92652	-4.34966	-2.23606	-0.920793	-0.656723	-0.322185	-0.231817	0
			TrueS		#DIV/0!	-16.3142	-15.6349	-14.9204	-10.5872	-10.15	-11.3354	-11.6177	-11.805	-11.9039	-11.9629	-10.79	-9.98243	-7.84553	-5.91051	-5.09359	-3.88293	0
		VN	Mixed																			0	-81.4346	-81.3685	-81.0439	-81.2406	-80.6999	-80.4799	-78.9033	-78.1103	-77.8717	-76.5738	-76.9589	-76.5179	-77.3634	-74.5238	-71.143	-59.7734	#DIV/0!
			TrueLM																			0	0	-0.0274801	0	-0.0107319	-0.0244718	-0.032962	-0.108305	-0.151523	-0.123679	-0.161282	-0.141729	-0.336736	-0.375831	-0.602241	-0.596486	-1.60529	#DIV/0!
			TrueS																			0	-18.5654	-18.604	-18.9561	-18.7487	-19.2756	-19.4871	-20.9884	-21.7382	-22.0046	-23.265	-22.8994	-23.1453	-22.2608	-24.8739	-28.2605	-38.6213	#DIV/0!
					Distance from ON (mm)																	ON	Distance from ON (mm)
					-2.55	-2.4	-2.25	-2.1	-1.95	-1.8	-1.65	-1.5	-1.35	-1.2	-1.05	-0.9	-0.75	-0.6	-0.45	-0.3	-0.15	0	0.15	0.3	0.45	0.6	0.75	0.9	1.05	1.2	1.35	1.5	1.65	1.8	1.95	2.1	2.25	2.4	2.55
	CD1 (Alb)	DT	Mixed		100	83.1933	77.551	76.1599	79.7306	82.8687	85.7839	86.6793	88.1549	90.205	92.7259	94.5956	95.7659	96.8029	97.2186	97.3794	97.0482	0
			TrueLM		0	11.7647	17.2684	19.8914	17.7409	15.1259	12.7719	11.6443	10.0751	8.06307	5.71598	3.71441	1.84586	0.713916	0.153212	0.0595593	0	0
			TrueS		0	5.04202	5.18053	3.94867	2.5285	2.00538	1.44417	1.67639	1.77005	1.73188	1.55813	1.69001	2.3882	2.48319	2.62817	2.56105	2.95184	0
		DN	Mixed																			0	83.0986	85.4183	87.6041	89.8874	90.7682	92.1683	91.5579	91.3084	90.4727	89.2914	90.3068	91.0068	93.3136	95.2793	96.8373	96.2617	96.2366
			TrueLM																			0	0	0	0	0.479566	1.21386	2.11003	3.15755	4.78788	5.83088	7.41362	6.95211	6.61717	4.84099	2.89977	1.39307	0.812678	1.6129
			TrueS																			0	16.9014	14.5817	12.3959	9.63303	8.01789	5.72168	5.28451	3.90368	3.69643	3.29494	2.74105	2.376	1.84536	1.82096	1.76958	2.92564	2.15054
		VT	Mixed		-100	-77.2358	-75.0176	-77.199	-84.092	-86.3378	-87.691	-87.4267	-87.0935	-86.5224	-85.6169	-86.6769	-88.4002	-89.8588	-92.8817	-95.1275	-96.9335	0
			TrueLM		0	-10.5691	-6.84545	-4.59219	-2.91426	-2.18222	-1.40404	-1.40646	-0.965423	-0.774497	-0.198779	-0.0538462	-0.0250355	-0.00960338	-0.0114811	0	0	0
			TrueS		0	-12.1951	-18.1369	-18.2088	-12.9937	-11.48	-10.905	-11.1669	-11.9411	-12.7031	-14.1843	-13.2692	-11.5747	-10.1316	-7.10677	-4.8725	-3.06653	0
		VN	Mixed																			0	-77.5665	-75.6219	-76.0195	-75.6222	-75.4948	-75.4269	-75.7929	-76.9388	-77.5326	-79.0553	-81.212	-83.5908	-85.3725	-87.4125	-90.286	-92.9329	-93.75
			TrueLM																			0	0	0	0	0	-0.0134644	-0.0102859	0	-0.0157146	-0.0142379	-0.0134003	-0.0182349	-0.0289302	-0.00632951	-0.00853388	-0.0338467	-0.0504796	0
			TrueS																			0	-22.4335	-24.3781	-23.9805	-24.3778	-24.4917	-24.5628	-24.2071	-23.0455	-22.4532	-20.9313	-18.7698	-16.3803	-14.6212	-12.5789	-9.68015	-7.01666	-6.25
[truncated: 19 more columns]

## Sheet: Source Fig2-fig suppl1
	Nadal-Nicolas et al., eLife 2020
	Source data Figure 2-figure supplement 1. Automatic routine. Macro validation.
				OpsS			OpsM
	#	Image		Manual	Automatic		Manual	Automatic
	1	1		392	378		1735	1730
		2		1575	1545		1636	1630
		3		1561	1549		1340	1313
	2	4		416	399		1553	1639
		5		1346	1455		1847	1843
		6		1699	1692		1398	1371
	3	7		276	252		1519	1609
		8		53	48		1357	1321
		9		1436	1431		1211	1211
	4	10		71	71		1788	1710
		11		1684	1675		1181	1104
		12		1945	1939		1778	1566
	5	13		1122	1120		1640	1627
		14		46	38		984	1050
		15		83	69		931	965
	Sum			13705	13661	0	21898	21689
				Manual	Automatic
	Total cells analyzed			35603	35350
	R2 Pearson coefficient				0.999077			0.966806

## Sheet: Source Fig3C, Supple file2 
	Nadal-Nicolas eLife 2020
	Source data Figure 3C, Supplement file 2. True S-cone and S-cone bipolar cells connectivity (Copne9-Venus mouse line).																Mean of DT and VN averages/retina									Statistics from GraphPad Prism. Fig3C, table S2
																			1 SCBC			1 True S-terminal				Normality and lognormality tests					Paired t test
	DT								VN										contact to x			contacted by x
	Retina	SCBC #	contact to		True S-terminal #	contacted by			Retina	SCBC #	contact to		True S-terminal #	contacted by					True S-cones			SCBCs				Number of True S-Cone pedicles / SCBC					Number of True S-Cone pedicles / SCBC
	Image name		'x' True S-cones			'x' SCBCs			Image name		'x' True S-cones			'x' SCBCs				#	DT	VN		DT	VN				DT	VN
	#1a-DT	1	2		1	6			1-VN	1	6		1	2			X	1	2.04255	4.5		3.92857	1.925			Test for normal distribution					Table Analyzed	Number TrueSCs / SCBC
		2	2		2	5				2	5		2	2				2	1.96154	5		4.53846	1.88571			Anderson-Darling test
		3	1		3	5				3	5		3	2				3	1.83333	4.41667		3.6	2.28571			A2*	N too small	N too small			Column B	VN
		4	1		4	6				4	5		4	1				4	2.08333	4.8		3.44444	1.81579			P value					vs.	vs.
		5	1		5	2				5	4		5	1				5	1.66667	4.4		3.53846	1.63415			Passed normality test (alpha=0.05)?					Column A	DT
		6	2		6	5				6	5		6	2			SD	1	0.832948	0.849837		1.48894	0.828576			P value summary
		7	1		7	4				7	4		7	3				2	0.823688	1.54919		1.1266	0.758149								Paired t test
		8	3		8	4				8	4		8	2				3	0.707107	1.08362		0.843274	0.92582			D'Agostino & Pearson test					P value	<0.0001
		9	4		9	5				9	3		9	2				4	1.01795	0.788811		0.704792	0.608732			K2	N too small	N too small			P value summary	****
		10	3		10	2				10	4		10	2				5	0.766965	0.516398		1.05003	0.58121			P value					Significantly different (P < 0.05)?	Yes
		11	3		11	3							11	2				X	1.91748	4.62333		3.80999	1.90927			Passed normality test (alpha=0.05)?					One- or two-tailed P value?	Two-tailed
		12	2		12	3							12	3				SD	0.169617	0.264995		0.446144	0.238193			P value summary					t, df	t=27.89, df=4
		13	1		13	4							13	3																	Number of pairs	5
		14	3		14	3							14	1												Shapiro-Wilk test
		15	1										15	3												W	0.9316	0.8593			How big is the difference?
		16	3										16	1												P value	0.6075	0.2259			Mean of differences (B - A)	2.706
		17	4										17	1			Total number and average of analyzed SCBCs and True S-cone pedicles									Passed normality test (alpha=0.05)?	Yes	Yes			SD of differences	0.2169
		18	2										18	1					True S-cones			SCBCs				P value summary	ns	ns			SEM of differences	0.09701
		19	3										19	1				#	DT	VN		DT	VN								95% confidence interval	2.437 to 2.975
		20	2										20	2				1	28	40		47	10			Kolmogorov-Smirnov test					R squared (partial eta squared)	0.9949
		21	2										21	2				2	13	35		26	11			KS distance	0.2025	0.2792
		22	1										22	1				3	10	35		18	12			P value	>0.1000	>0.1000			How effective was the pairing?
		23	2										23	2				4	10	38		24	10			Passed normality test (alpha=0.05)?	Yes	Yes			Correlation coefficient (r)	0.5778
	#1b-DT	1	3		1	7							24	2				5	13	41		18	10			P value summary	ns	ns			P value (one tailed)	0.1538
		2	2		2	5							25	1				Sum	74	189		133	53								P value summary	ns
		3	2		3	3							26	3				X	14.8	37.8		26.6	10.6			Number of values	5	5			Was the pairing significantly effective?	No
		4	3		4	4							27	3				SD	7.52994	2.77489		11.9499	0.894427
		5	1		5	3							28	3
		6	1		6	2							29	1					True S-cones			SCBCs
		7	2		7	5							30	2				Total	263			186
		8	1		8	7							31	3												Number of SCBCs / True S-Cone pedicle					Number of SCBCs / True S-Cone pedicle
		9	2		9	3							32	2													DT	VN
		10	3		10	4							33	3												Test for normal distribution
		11	2		11	3							34	2												Anderson-Darling test					Table Analyzed	Number of SCBCs / TrueSC
		12	3		12	3							35	1												A2*	N too small	N too small
		13	2		13	2							36	4												P value					Column B	VN
		14	2		14	2							37	1												Passed normality test (alpha=0.05)?					vs.	vs.
		15	2										38	1												P value summary					Column A	DT
		16	1										39	1
		17	2										40	2												D'Agostino & Pearson test					Paired t test
		18	2																							K2	N too small	N too small			P value	0.001
		19	2																							P value					P value summary	**
		20	3																							Passed normality test (alpha=0.05)?					Significantly different (P < 0.05)?	Yes
		21	1																							P value summary					One- or two-tailed P value?	Two-tailed
		22	2																												t, df	t=8.526, df=4
		23	2																							Shapiro-Wilk test					Number of pairs	5
		24	1																							W	0.8472	0.93
		X	2.04255			3.92857				X	4.5			1.925												P value	0.1858	0.5965			How big is the difference?
		SD	0.832948			1.48894				SD	0.849837			0.828576												Passed normality test (alpha=0.05)?	Yes	Yes			Mean of differences (B - A)	-1.901
																										P value summary	ns	ns			SD of differences	0.4985
																															SEM of differences	0.2229
	Retina	SCBC #	contact to		True S-terminal #	contacted by			Retina	SCBC #	contact to		True S-terminal #	contacted by												Kolmogorov-Smirnov test					95% confidence interval	-2.520 to -1.282
	Image name		'x' True S-cones			'x' SCBCs			Image name		'x' True S-cones			'x' SCBCs												KS distance	0.2811	0.2737			R squared (partial eta squared)	0.9478
	2-DT	1	2		1	5			2-VN	1	8		1	2												P value	>0.1000	>0.1000
		2	3		2	4				2	4		2	1												Passed normality test (alpha=0.05)?	Yes	Yes			How effective was the pairing?
		3	2		3	4				3	4		3	1												P value summary	ns	ns			Correlation coefficient (r)	0.03419
		4	4		4	3				4	5		4	2																	P value (one tailed)	0.4782
		5	4		5	5				5	4		5	1												Number of values	5	5			P value summary	ns
		6	1		6	5				6	7		6	2																	Was the pairing significantly effective?	No
		7	1		7	3				7	3		7	2
		8	1		8	5				8	4		8	3
		9	1		9	6				9	6		9	3
		10	2		10	6				10	4		10	3
		11	2		11	6				11	6		11	2
		12	1		12	4							12	2
		13	2		13	3							13	2
		14	2										14	2
		15	3										15	1
		16	2										16	2
		17	2										17	1
		18	1										18	2
		19	2										19	2
		20	2										20	3
		21	2										21	1
		22	2										22	2
		23	2										23	3
		24	2										24	2
		25	2										25	3
		26	1										26	2
													27	3
													28	1
													29	1
													30	3
													31	1
													32	1
													33	2
													34	1
													35	1
		X	1.96154			4.53846				X	5			1.88571
		SD	0.823688			1.1266				SD	1.54919			0.758149
	Retina	SCBC #	contact to		True S-terminal #	contacted by			Retina	SCBC #	contact to		True S-terminal #	contacted by
	Image name		'x' True S-cones			'x' SCBCs			Image name		'x' True S-cones			'x' SCBCs
	3-DT	1	3		1	5			3-VN	1	4		1	4
		2	2		2	3				2	5		2	1
		3	3		3	3				3	3		3	1
		4	2		4	3				4	4		4	2
		5	2		5	4				5	7		5	1
		6	1		6	4				6	4		6	3
		7	1		7	2				7	4		7	2
		8	2		8	4				8	5		8	2
		9	2		9	4				9	5		9	3
		10	1		10	4				10	4		10	3
		11	1							11	5		11	3
		12	1							12	3		12	2
		13	1										13	2
		14	2										14	3
		15	2										15	4
		16	2										16	3
		17	2										17	1
		18	3										18	1
													19	2
													20	2
													21	3
													22	4
													23	1
													24	1
													25	3
													26	3
													27	2
													28	1
													29	2
													30	3
													31	2
													32	2
													33	3
													34	2
													35	3
		X	1.83333			3.6				X	4.41667			2.28571
		SD	0.707107			0.843274				SD	1.08362			0.92582
	Retina	SCBC #	contact to		True S-terminal #	contacted by			Retina	SCBC #	contact to		True S-terminal #	contacted by
	Image name		'x' True S-cones			'x' SCBCs			Image name		'x' True S-cones			'x' SCBCs
	4-DT	1	2		1	5			4-VN	1	5		1	1
		2	2		2	3				2	5		2	1
		3	3		3	4				3	4		3	1
		4	5		4	3				4	4		4	2
		5	3		5	4				5	5		5	2
		6	1		6	3				6	4		6	2
		7	2		7	4				7	6		7	2
		8	1		8	3				8	6		8	2
		9	2		9	4				9	5		9	2
		10	2		10	3				10	4		10	3
		11	3		11	3							11	2
		12	2		12	2							12	1
		13	1		13	3							13	2
		14	1		14	3							14	2
		15	1		15	4							15	2
		16	2		16	4							16	2
		17	2		17	4							17	1
		18	3		18	3							18	2
		19	2										19	2
		20	2										20	2
		21	4										21	2
		22	1										22	3
		23	2										23	1
		24	1										24	1
													25	2
													26	2
													27	2
													28	2
													29	3
													30	3
													31	1
													32	1
													33	2
													34	2
													35	2
													36	2
													37	1
													38	1
		X	2.08333			3.44444				X	4.8			1.81579
		SD	1.01795			0.704792				SD	0.788811			0.608732
	Retina	SCBC #	contact to		True S-terminal #	contacted by			Retina	SCBC #	contact to		True S-terminal #	contacted by
	Image name		'x' True S-cones			'x' SCBCs			Image name		'x' True S-cones			'x' SCBCs
	5-DT	1	3		1	5			5-VN	1	4		1	1
		2	2		2	2				2	5		2	1
		3	3		3	4				3	4		3	1
		4	2		4	4				4	5		4	2
		5	2		5	5				5	4		5	2
		6	2		6	4				6	4		6	1
		7	1		7	2				7	5		7	2
		8	3		8	3				8	4		8	1
		9	1		9	4				9	5		9	2
		10	1		10	4				10	4		10	1
		11	1		11	2							11	1
		12	1		12	4							12	3
		13	1		13	3							13	1
		14	1										14	1
		15	2										15	1
		16	1										16	1
		17	2										17	2
		18	1										18	2
													19	2
													20	2
													21	2
													22	2
													23	2
													24	2
													25	2
													26	2
													27	2
													28	1
													29	1
													30	1
													31	1
													32	1
													33	1
													34	2
													35	2
													36	2
													37	2
													38	3
													39	2
													40	2
													41	2
		X	1.66667			3.53846				X	4.4			1.63415
		SD	0.766965			1.05003				SD	0.516398			0.58121

## Sheet: Source Fig3E, 4B, Suppl f1C, 3
	Nadal-Nicolas et al., eLife 2020																																												Neighbors = number of neighbors in a known radio (18um)
																																													Class = different class depending on the number or neighbors (=TRUNC(neighbor/2))
	Source data Figure 3E, Figure 4B, Supplement file 1C and supplement file 3.																	Statistics from GraphPad Prism.																					kNeighbor maps data from 1mm Ø Circular areas
																																	Statistics. Size Effect and Power							SCBCs
	Whole population of SCBCs					1mm Ø Circular areas data.												Normality and Lognormality test									Unpaired t test												Sub-type	Cpne9-Venus
	Total number. Suppl file 1C					SCBC. Fig 3E, Suppl file 2				True S-cones. Figure 4B, Suppl file 2									Cpne9 DT	Cpne9 VN	TrueS C57 DT	TrueS C57 VN	TrueS CD1 DT	TrueS CD1 VN															#	DT					VN
										True S cones - 1mm Ø								Test for normal distribution									Table Analyzed	Cpne9 DT VN	TrueS DT VN	TrueS DT VN			Effect Size	Cpne9 VN	TrueS CD1 DT	TrueS CD1 VN			Total cells/retina	424					641
	Cpne9-Venus line					Cpne9-Venus line - 1mm Ø				Pigmented			Albino					Anderson-Darling test																vs.	vs.	vs.			Cell x,y coordinates	x	y	neighbors	Class		x	y	neighbors	Class
	#	SCBC				#	DT	VN		#	DT	VN	#	DT	VN			A2*	0.294	0.1514	0.3222	0.4465	0.3187	0.1597			Column B	Cpne9 VN	TrueS CD1 DT	TrueS CD1 VN				Cpne9 DT	TrueS C57 DT	TrueS C57 VN				593	7	0	0		632	2	0	0
	1	12767				1	465	661		1	87	3469	1	82	2569			P value	0.5116	0.9318	0.4399	0.2039	0.4492	0.9157			vs.	vs.	vs.	vs.										690	8	0	0		539	9	0	0
	2	11831				2	424	641		2	128	4043	2	73	2277			Passed normality test (alpha=0.05)?	Yes	Yes	Yes	Yes	Yes	Yes			Column A	Cpne9 DT	TrueS C57 DT	TrueS C57 VN			Cohen's d	3.96281	10.4655	7.90502				451	22	0	0		512	11	0	0
	3	9755				3	487	667		3	130	3183	3	82	2068			P value summary	ns	ns	ns	ns	ns	ns									Glass's delta	4.31618	95.5521	229.44				752	25	0	0		584	16	0	0
	4	11015				4	367	545		4	180	3967	4	74	2622												Unpaired t test													663	29	0	0		752	21	0	0
	5	10537				5	414	599		5	113	2949	5	95	2975			D'Agostino & Pearson test									P value	<0.0001	0.0179	0.0003			Cohen's d = (M2 - M1) ⁄ SDpooled							568	36	0	0		620	32	0	0
	6	10599				6	428	725		6	110	3281	6	84	2429			K2	0.4141	0.0201	1.924	1.452	0.5245	0.5874			P value summary	****	*	***			Sdpooled	√[(s12+ s22) / 2]						426	41	0	0		462	34	0	0
	7	11181				7	333	629		7	64	3067	7	95	1627			P value	0.813	0.99	0.3821	0.4837	0.7693	0.7455			Significantly different (P < 0.05)?	Yes	Yes	Yes			Cohen's d	-3.96281	-10.4655	-7.90502				486	48	0	0		717	42	0	0
	8	11111				8	420	570		8	109	2915	8	68	2202			Passed normality test (alpha=0.05)?	Yes	Yes	Yes	Yes	Yes	Yes			One- or two-tailed P value?	Two-tailed	Two-tailed	Two-tailed			Glass's delta = (M2-M1)/SD12	-4.31618	-95.5521	-229.44				376	62	0	0		392	44	0	0
	X	11099.5				X	417.25	629.625		X	115.125	3359.25		81.625	2346.12			P value summary	ns	ns	ns	ns	ns	ns			t, df	t=7.926, df=14	t=2.680, df=14	t=4.809, df=14										342	66	0	0		562	58	0	0
	SD	902.706				SD	49.2044	57.6466		SD	33.9514	437.065		9.86969	405																									665	70	0	0		818	58	0	0
																		Shapiro-Wilk test									How big is the difference?						Power	1	1	1				560	68	0	0		694	58	0	0
	RATIO Whole retina -									DT/VN RATIO								W	0.9495	0.9818	0.9442	0.873	0.92	0.9854			Mean of column A	417.3	115.1	3359										621	82	0	0		763	63	0	0
	True Scones vs SCBCs					DT/VN RATIO				Pigmented			Albino					P value	0.7064	0.9714	0.6528	0.1612	0.4298	0.9847			Mean of column B	629.6	81.63	2346										855	87	0	0		619	66	0	0
		Total retina				#	DT	VN		#	DT	VN	#	DT	VN			Passed normality test (alpha=0.05)?	Yes	Yes	Yes	Yes	Yes	Yes			Difference between means (B - A) ± SEM	212.4 ± 26.80	-33.50 ± 12.50	-1013 ± 210.7			Pigmented/Albino	DT	VN					749	89	1	0		438	68	0	0
		TrueS	SCBCs			1	1	1.42151		1	1	39.8736	1	1	31.3293			P value summary	ns	ns	ns	ns	ns	ns			95% confidence interval	154.9 to 269.8	-60.31 to -6.689	-1465 to -561.3				vs.	vs.					800	93	0	0		666	74	0	0
	Pig	18608.1	11099.5			2	1	1.51179		2	1	31.5859	2	1	31.1918												R squared (eta squared)	0.8177	0.3391	0.6229				DT	VN					574	101	0	0		409	75	1	0
	Alb	14366.1				3	1	1.36961		3	1	24.4846	3	1	25.2195			Kolmogorov-Smirnov test																						757	103	1	0		513	80	0	0
						4	1	1.48501		4	1	22.0389	4	1	35.4324			KS distance	0.2237	0.1334	0.2056	0.196	0.1623	0.1229			F test to compare variances						Cohen's d	1.33994	2.40454					334	106	0	0		718	84	0	0
		TrueS	SCBCs			5	1	1.44686		5	1	26.0973	5	1	31.3158			P value	>0.1000	>0.1000	>0.1000	>0.1000	>0.1000	>0.1000			F, DFn, Dfd	1.373, 7, 7	11.83, 7, 7	1.165, 7, 7										944	106	0	0		816	84	0	0
	Pig	1.67648	1			6	1	1.69393		6	1	29.8273	6	1	28.9167			Passed normality test (alpha=0.05)?	Yes	Yes	Yes	Yes	Yes	Yes			P value	0.6866	0.0042	0.8458			Glass's delta	0.986705	2.31802					662	116	0	0		404	91	1	0
	Alb	1.2943	1			7	1	1.88889		7	1	47.9219	7	1	17.1263			P value summary	ns	ns	ns	ns	ns	ns			P value summary	ns	**	ns										374	118	0	0		860	90	0	0
						8	1	1.35714		8	1	26.7431	8	1	32.3824												Significantly different (P < 0.05)?	No	Yes	No			Power	0.451454	1					316	122	0	0		568	94	0	0
						X	1	1.52184		X	1	31.0716		1	29.1143			Number of values	8	8	8	8	8	8																844	130	0	0		278	94	0	0
						SD	0	0.181967		SD	0	8.71515		0	5.65165												Data analyzed													705	125	0	0		312	95	0	0
																											Sample size, column A	8	8	8										250	128	0	0		366	100	0	0
																											Sample size, column B	8	8	8										352	131	0	0		933	103	0	0
										Ratio between TrueScones vs SCBCs																														462	131	0	0		594	103	1	0
											DT		VN																											760	134	0	0		629	105	0	0
											TrueS	SCBC	TrueS	SCBC																										431	137	0	0		768	105	0	0
										Pig	1	3.62432	5.33532	1																										551	142	1	0		898	115	0	0
										Alb	1	5.11179	3.72623	1																										457	156	0	0		506	117	1	0
																																								558	158	1	0		522	118	1	0
																																								933	161	0	0		592	120	1	0
																																								1007	164	0	0		686	122	0	0
																																								826	169	0	0		828	128	0	0
																																								481	174	0	0		754	131	0	0
																																								758	178	0	0		630	131	0	0
																																								604	184	0	0		974	136	2	1
																																								516	184	0	0		921	136	0	0
																																								959	194	0	0		323	138	0	0
																																								391	196	0	0		360	142	0	0
																																								174	204	0	0		957	141	1	0
																																								342	202	0	0		273	146	0	0
																																								1054	203	0	0		780	148	0	0
																																								258	206	0	0		984	147	1	0
																																								297	209	0	0		479	149	0	0
																																								530	212	0	0		507	153	0	0
																																								940	214	0	0		716	157	0	0
																																								228	218	0	0		294	160	0	0
																																								574	220	0	0		428	161	0	0
																																								641	222	0	0		463	167	1	0
																																								960	226	0	0		860	166	1	0
																																								481	228	0	0		350	170	0	0
																																								868	230	0	0		570	172	0	0
																																								313	239	0	0		821	177	0	0
																																								745	240	0	0		758	177	0	0
																																								700	241	0	0		863	178	1	0
																																								178	243	0	0		244	180	1	0
																																								375	245	0	0		188	181	0	0
																																								796	244	0	0		322	180	0	0
																																								441	254	0	0		1017	181	0	0
																																								246	252	0	0		669	185	0	0
																																								200	262	1	0		456	187	1	0
																																								946	264	0	0		538	190	0	0
																																								592	266	0	0		594	192	0	0
																																								625	266	0	0		985	193	0	0
																																								236	272	1	0		386	194	0	0
																																								901	273	0	0		260	194	1	0
																																								1041	274	0	0		286	194	0	0
																																								216	274	2	1		636	196	0	0
																																								119	282	0	0		790	198	0	0
																																								445	285	1	0		474	200	0	0
																																								557	288	0	0		904	200	0	0
																																								1121	291	0	0		358	202	0	0
																																								432	298	1	0		563	209	0	0
																																								822	297	0	0		235	219	0	0
																																								750	300	1	0		305	219	0	0
																																								736	300	1	0		941	219	0	0
																																								505	301	0	0		1011	219	0	0
																																								995	310	0	0		201	219	0	0
																																								192	313	0	0		697	223	0	0
																																								603	317	0	0		871	223	0	0
																																								112	320	0	0		477	226	0	0
																																								821	325	1	0		761	226	1	0
																																								769	329	0	0		503	231	0	0
																																								842	330	1	0		1041	231	0	0
																																								483	333	0	0		963	232	0	0
																																								73	333	0	0		1077	232	0	0
																																								174	338	0	0		164	237	0	0
																																								505	338	0	0		342	239	0	0
																																								890	340	1	0		364	237	0	0
																																								209	343	0	0		775	237	1	0
																																								410	344	0	0		570	239	0	0
																																								1072	349	0	0		602	240	0	0
																																								554	352	1	0		934	241	0	0
																																								307	355	0	0		412	242	0	0
																																								543	355	1	0		836	242	0	0
																																								905	353	1	0		886	242	0	0
																																								389	359	0	0		308	244	0	0
																																								358	363	0	0		750	246	0	0
																																								860	362	1	0		673	248	0	0
																																								983	365	0	0		627	250	1	0
																																								189	369	0	0		644	253	1	0
																																								1091	370	0	0		527	257	0	0
																																								875	371	1	0		1047	259	0	0
																																								116	374	0	0		130	268	0	0
																																								1156	375	1	0		1012	267	1	0
																																								480	382	0	0		221	269	0	0
																																								1148	389	1	0		467	272	0	0
																																								587	392	0	0		910	272	0	0
																																								260	396	0	0		1029	273	1	0
																																								1008	395	0	0		962	276	1	0
																																								1119	396	0	0		323	277	0	0
																																								1034	400	0	0		544	277	1	0
																																								1088	401	0	0		1094	278	0	0
																																								414	404	0	0		948	280	1	0
																																								482	406	0	0		574	281	1	0
																																								171	408	0	0		591	282	1	0
																																								606	410	1	0		682	291	0	0
																																								33	415	1	0		407	292	0	0
																																								690	414	0	0		776	293	0	0
																																								777	417	1	0		538	294	1	0
																																								720	420	0	0		337	297	0	0
																																								197	422	0	0		123	298	0	0
																																								1094	426	0	0		1049	298	0	0
																																								597	424	1	0		456	302	0	0
																																								33	428	1	0		266	301	0	0
																																								121	436	0	0		860	306	0	0
																																								783	438	2	1		77	306	0	0
																																								232	441	0	0		502	310	0	0
																																								334	438	0	0		194	316	0	0
																																								764	439	1	0		172	316	0	0
																																								698	442	0	0		829	317	0	0
																																								933	444	1	0		611	324	0	0
																																								410	444	0	0		1106	325	0	0
																																								78	448	0	0		440	326	0	0
																																								912	450	1	0		478	327	0	0
																																								875	455	0	0		320	332	0	0
																																								1147	456	0	0		632	334	0	0
																																								420	466	0	0		404	336	0	0
																																								351	472	0	0		142	340	0	0
																																								445	472	0	0		82	340	0	0
																																								180	482	0	0		255	342	0	0
																																								1005	484	0	0		762	344	1	0
																																								1078	485	0	0		1027	344	0	0
																																								948	489	0	0		1143	345	0	0
																																								15	497	0	0		206	348	0	0
																																								78	500	0	0		688	346	0	0
																																								587	504	1	0		364	347	0	0
																																								806	504	0	0		715	350	0	0
																																								551	505	0	0		777	353	1	0
																																								865	507	0	0		808	353	0	0
																																								35	509	0	0		642	356	0	0
																																								329	510	0	0		896	359	1	0
																																								378	516	0	0		518	363	0	0
																																								591	516	1	0		593	365	0	0
																																								970	518	0	0		864	364	1	0
																																								1020	518	1	0		1123	363	0	0
																																								434	523	1	0		942	366	1	0
																																								247	528	0	0		177	368	0	0
																																								845	529	0	0		952	368	1	0
																																								686	532	0	0		552	370	0	0
																																								1031	531	1	0		1082	370	0	0
																																								1097	535	0	0		454	376	0	0
																																								221	539	0	0		745	373	0	0
																																								429	542	1	0		858	376	1	0
																																								342	542	0	0		262	375	0	0
																																								1162	544	0	0		912	374	1	0
																																								642	545	0	0		1160	376	0	0
																																								727	545	1	0		879	387	0	0
																																								898	546	0	0		349	388	0	0
																																								989	550	0	0		808	389	0	0
																																								96	550	0	0		169	391	0	0
																																								172	554	1	0		718	392	0	0
																																								918	559	0	0		644	395	1	0
																																								715	560	1	0		1006	394	0	0
																																								161	564	1	0		1148	396	1	0
																																								960	565	0	0		101	397	0	0
																																								359	566	0	0		697	399	1	0
																																								6	575	0	0		624	399	2	1
																																								96	585	0	0		410	401	0	0
																																								1118	586	0	0		1044	400	0	0
																																								828	588	1	0		1088	401	1	0
																																								648	592	0	0		605	405	2	1
																																								784	590	0	0		590	408	1	0
																																								264	593	0	0		1106	407	1	0
																																								442	595	0	0		678	409	1	0
																																								713	593	0	0		517	413	0	0
																																								203	594	0	0		774	413	0	0
																																								38	597	1	0		950	412	1	0
																																								160	601	1	0		1160	413	1	0
																																								687	600	0	0		49	416	0	0
																																								845	600	1	0		835	417	0	0
																																								469	604	0	0		449	420	0	0
																																								1046	603	1	0		982	421	0	0
																																								350	606	1	0		194	423	0	0
																																								880	609	0	0		317	425	0	0
																																								276	612	0	0		858	428	1	0
																																								572	612	0	0		398	428	0	0
																																								58	614	0	0		949	430	1	0
																																								598	614	0	0		233	432	0	0
																																								30	615	1	0		1003	433	0	0
																																								164	616	1	0		548	434	0	0
																																								342	616	1	0		786	442	0	0
																																								793	617	0	0		852	440	1	0
																																								394	619	0	0		1039	442	0	0
																																								1057	618	1	0		827	445	0	0
																																								124	623	0	0		365	448	0	0
																																								203	622	0	0		62	453	0	0
																																								422	622	0	0		507	453	0	0
																																								636	622	0	0		1152	454	0	0
																																								737	624	0	0		179	459	1	0
																																								494	628	0	0		719	459	1	0
																																								543	634	0	0		447	460	0	0
																																								666	633	0	0		1063	461	0	0
																																								948	634	1	0		34	465	0	0
																																								588	640	0	0		954	465	1	0
																																								1201	640	0	0		679	467	0	0
																																								61	644	0	0		135	468	0	0
																																								616	642	0	0		327	471	0	0
																																								758	644	0	0		718	470	1	0
																																								420	647	0	0		1120	470	0	0
																																								961	646	1	0		404	471	0	0
																																								12	648	0	0		937	477	1	0
																																								245	648	0	0		186	479	1	0
																																								329	648	0	0		563	478	0	0
																																								194	654	0	0		1154	480	0	0
																																								911	665	0	0		632	483	0	0
																																								78	667	0	0		747	487	0	0
																																								634	666	0	0		443	486	0	0
																																								1115	669	0	0		795	487	0	0
																																								1049	673	0	0		478	487	0	0
																																								107	676	0	0		527	489	1	0
																																								154	683	0	0		69	490	0	0
																																								310	684	0	0		1100	492	0	0
																																								821	684	0	0		250	494	0	0
																																								640	694	0	0		587	497	1	0
																																								548	697	0	0		1037	498	0	0
																																								224	701	0	0		996	503	1	0
																																								1080	705	0	0		1137	503	0	0
																																								872	704	0	0		278	507	0	0
																																								1046	704	1	0		660	506	0	0
																																								1129	704	0	0		1170	506	0	0
																																								345	704	1	0		373	508	0	0
																																								313	707	0	0		516	508	1	0
																																								375	711	0	0		598	511	1	0
																																								1057	716	1	0		682	509	0	0
																																								334	715	1	0		816	510	0	0
																																								733	723	0	0		634	514	0	0
																																								884	726	1	0		893	515	0	0
																																								98	727	1	0		941	517	0	0
																																								32	730	0	0		996	517	1	0
																																								900	730	1	0		307	518	0	0
																																								80	732	1	0		750	523	0	0
																																								945	734	0	0		434	523	0	0
																																								838	740	0	0		1030	527	0	0
																																								990	741	0	0		483	529	0	0
																																								1194	742	0	0		40	528	0	0
																																								520	748	0	0		703	531	0	0
																																								600	748	0	0		980	534	0	0
																																								644	746	1	0		575	538	0	0
																																								206	748	1	0		1176	535	1	0
																																								323	749	0	0		881	544	1	0
																																								486	751	0	0		913	545	0	0
																																								675	757	0	0		767	546	1	0
																																								348	755	0	0		108	546	0	0
																																								395	754	0	0		219	547	0	0
																																								575	754	0	0		618	547	1	0
																																								274	756	0	0		1105	546	0	0
																																								443	758	0	0		322	548	0	0
																																								640	762	1	0		944	548	0	0
																																								198	766	1	0		186	550	0	0
																																								1035	764	0	0		808	550	0	0
																																								774	773	0	0		1177	551	1	0
																																								23	778	0	0		504	553	1	0
																																								49	782	0	0		448	556	0	0
																																								440	785	0	0		281	557	0	0
																																								534	786	0	0		663	556	0	0
																																								680	788	0	0		891	557	1	0
																																								158	789	0	0		631	559	1	0
																																								396	791	0	0		1201	560	0	0
																																								996	792	0	0		249	564	0	0
																																								1153	794	0	0		761	567	1	0
																																								817	796	0	0		56	568	0	0
																																								1056	798	0	0		1070	570	0	0
																																								34	801	0	0		496	572	1	0
																																								367	806	1	0		381	575	0	0
																																								1128	806	0	0		836	574	0	0
																																								324	811	0	0		1016	574	0	0
																																								916	811	0	0		585	578	2	1
																																								1029	812	0	0		332	579	0	0
																																								194	813	0	0		456	580	0	0
																																								275	813	0	0		670	583	1	0
																																								948	814	0	0		1108	582	0	0
																																								1159	825	0	0		358	584	0	0
																																								374	822	1	0		6	585	0	0
																																								600	824	0	0		655	584	1	0
																																								55	828	0	0		908	585	0	0
																																								803	831	0	0		575	588	2	1
																																								858	833	0	0		134	590	0	0
																																								109	839	0	0		213	590	0	0
																																								747	836	0	0		258	591	0	0
																																								463	838	0	0		420	592	0	0
																																								80	846	0	0		596	593	2	1
																																								552	846	0	0		818	595	0	0
																																								1054	845	0	0		856	595	0	0
																																								894	849	1	0		291	604	0	0
																																								319	857	1	0		714	605	0	0
																																								172	852	0	0		937	605	0	0
																																								384	860	0	0		458	607	0	0
																																								913	860	1	0		1165	608	0	0
																																								410	860	0	0		1123	609	0	0
																																								687	870	1	0		889	611	1	0
																																								123	874	0	0		238	611	0	0
																																								308	876	1	0		1020	615	0	0
																																								880	874	0	0		48	613	0	0
																																								935	883	0	0		678	613	0	0
																																								671	883	1	0		402	616	0	0
																																								254	884	0	0		1063	614	1	0
																																								1020	888	0	0		644	618	0	0
																																								489	889	0	0		975	618	0	0
																																								750	890	0	0		768	620	0	0
																																								452	898	0	0		123	623	0	0
																																								324	907	0	0		798	624	0	0
																																								518	903	0	0		462	629	0	0
																																								104	905	0	0		537	628	0	0
																																								383	908	0	0		348	630	0	0
																																								725	911	0	0		887	630	1	0
																																								132	911	0	0		1074	632	1	0
																																								548	913	0	0		937	633	0	0
																																								207	917	0	0		592	633	1	0
																																								1076	916	0	0		174	636	0	0
																																								85	918	1	0		1185	637	0	0
																																								277	922	0	0		507	641	0	0
																																								1121	922	1	0		602	640	1	0
																																								627	923	0	0		908	641	0	0
																																								98	928	2	1		12	645	0	0
																																								469	931	0	0		223	643	0	0
																																								750	933	0	0		142	647	0	0
																																								388	932	0	0		1029	648	0	0
																																								1110	937	1	0		1113	649	0	0
																																								996	940	0	0		191	653	0	0
																																								108	940	1	0		424	651	1	0
																																								804	939	0	0		1155	653	0	0
																																								207	942	0	0		680	655	0	0
																																								411	944	0	0		55	658	0	0
																																								596	946	0	0		937	658	0	0
																																								974	951	0	0		101	664	0	0
																																								687	953	0	0		167	664	0	0
																																								830	956	0	0		261	664	0	0
																																								866	958	0	0		753	663	0	0
																																								124	968	0	0		857	665	0	0
																																								207	969	0	0		409	666	1	0
																																								469	970	0	0		980	667	0	0
																																								655	978	0	0		320	669	0	0
																																								405	981	1	0		515	671	0	0
																																								506	984	0	0		560	674	0	0
																																								710	987	0	0		632	674	0	0
																																								909	989	0	0		692	675	0	0
																																								681	996	0	0		792	675	0	0
																																								418	997	1	0		220	676	0	0
																																								620	998	0	0		1005	676	0	0
																																								194	1003	0	0		907	679	0	0
																																								281	1003	0	0		1179	679	0	0
																																								342	1008	0	0		846	688	0	0
																																								814	1010	0	0		188	688	0	0
																																								871	1012	0	0		746	689	0	0
																																								1016	1012	0	0		1139	688	0	0
																																								486	1019	0	0		129	692	1	0
																																								936	1016	0	0		1048	694	0	0
																																								765	1018	0	0		491	696	0	0
																																								394	1018	0	0		981	700	0	0
																																								658	1018	0	0		1094	701	1	0
																																								219	1022	0	0		432	702	1	0
																																								266	1033	0	0		666	703	1	0
																																								690	1034	0	0		614	704	0	0
																																								173	1035	0	0		113	706	1	0
																																								801	1039	0	0		357	706	0	0
																																								374	1041	0	0		823	708	0	0
																																								407	1040	0	0		946	717	0	0
																																								910	1041	0	0		1141	714	1	0
																																								602	1044	1	0		750	717	1	0
																																								500	1046	0	0		849	717	0	0
																																								446	1046	0	0		1079	716	1	0
																																								1012	1053	0	0		662	718	2	1
																																								618	1054	1	0		442	721	1	0
																																								942	1056	0	0		38	725	0	0
																																								850	1069	0	0		300	725	0	0
																																								910	1070	0	0		156	728	0	0
																																								402	1072	1	0		587	727	0	0
																																								476	1073	0	0		744	730	1	0
																																								422	1077	1	0		254	733	0	0
																																								273	1077	0	0		529	733	0	0
																																								297	1079	0	0		985	733	0	0
																																								630	1083	0	0		656	734	1	0
																																								250	1084	0	0		1142	734	1	0
																																								551	1086	0	0		817	735	0	0
																																								897	1093	0	0		488	736	0	0
																																								697	1095	0	0		369	740	0	0
																																								315	1097	0	0		711	739	0	0
																																								358	1100	0	0		77	739	0	0
																																								452	1120	0	0		113	741	0	0
																																								620	1121	0	0		840	739	0	0
																																								772	1123	0	0		553	742	0	0
																																								820	1125	0	0		12	744	0	0
																																								706	1130	0	0		1052	744	0	0
																																								558	1130	0	0		217	752	0	0
																																								362	1134	0	0		417	758	1	0
																																								658	1138	0	0		431	759	1	0
																																								874	1144	0	0		96	760	1	0
																																								493	1146	0	0		772	762	0	0
																																								454	1148	0	0		881	760	1	0
																																								686	1152	0	0		147	765	0	0
																																								784	1152	0	0		977	766	0	0
																																								552	1156	0	0		1068	766	0	0
																																								432	1163	0	0		618	768	0	0
																																								596	1164	0	0		1180	767	0	0
																																								650	1166	0	0		916	771	0	0
																																								369	1165	0	0		596	772	0	0
																																								401	1179	0	0		111	772	1	0
																																								740	1191	0	0		544	776	1	0
																																								554	1190	0	0		1011	776	0	0
																																								578	1206	0	0		323	778	0	0
																																													198	781	1	0
																																													358	782	1	0
																																													877	781	2	1
																																													239	782	0	0
																																													404	783	0	0
																																													351	788	1	0
																																													934	790	0	0
																																													1102	792	0	0
																																													537	793	1	0
																																													697	797	0	0
																																													878	798	1	0
																																													564	799	0	0
																																													636	798	0	0
																																													613	802	0	0
																																													196	801	1	0
																																													1075	802	0	0
																																													958	801	0	0
																																													170	805	0	0
																																													437	809	0	0
																																													763	807	0	0
																																													310	808	0	0
																																													793	808	0	0
																																													815	809	0	0
																																													130	810	0	0
																																													993	817	0	0
																																													404	818	0	0
																																													1058	826	0	0
																																													633	824	0	0
																																													888	823	0	0
																																													194	828	0	0
																																													665	830	0	0
																																													702	833	0	0
																																													39	834	0	0
																																													269	842	0	0
																																													540	836	0	0
																																													593	836	0	0
																																													508	838	1	0
																																													1086	843	0	0
																																													231	846	0	0
																																													410	848	1	0
																																													1009	848	0	0
																																													727	851	0	0
																																													928	849	0	0
																																													1129	850	0	0
																																													118	852	0	0
																																													1106	854	0	0
																																													149	855	0	0
																																													398	855	1	0
																																													511	859	1	0
																																													791	860	0	0
																																													620	861	0	0
																																													83	863	0	0
																																													650	864	0	0
																																													554	865	0	0
																																													673	864	0	0
																																													958	864	0	0
																																													264	870	0	0
																																													370	867	0	0
																																													903	866	0	0
																																													182	872	0	0
																																													755	872	0	0
																																													1051	875	0	0
																																													446	881	0	0
																																													822	877	0	0
																																													1012	877	0	0
																																													926	879	0	0
																																													222	882	0	0
																																													348	882	0	0
																																													594	881	0	0
																																													1117	886	1	0
																																													1135	890	1	0
																																													547	894	0	0
																																													677	897	0	0
																																													890	897	0	0
																																													282	902	0	0
																																													708	902	0	0
																																													991	901	0	0
																																													129	902	0	0
																																													571	903	0	0
																																													1100	910	1	0
																																													223	907	1	0
																																													463	907	1	0
																																													809	907	0	0
																																													74	908	0	0
																																													391	910	0	0
																																													520	910	0	0
																																													857	913	0	0
																																													591	913	0	0
																																													648	913	0	0
																																													328	917	0	0
																																													542	916	0	0
																																													1065	917	0	0
																																													734	920	1	0
																																													835	919	0	0
																																													298	922	0	0
																																													979	921	0	0
																																													236	924	1	0
																																													430	927	0	0
																																													474	926	1	0
																																													275	928	0	0
																																													777	928	0	0
																																													889	928	0	0
																																													1111	928	1	0
																																													724	937	1	0
																																													102	938	0	0
																																													864	941	0	0
																																													187	949	0	0
																																													508	944	0	0
																																													532	947	0	0
																																													959	947	0	0
																																													652	950	0	0
																																													768	953	0	0
																																													443	954	0	0
																																													156	957	0	0
																																													232	960	0	0
																																													700	960	1	0
																																													287	961	0	0
																																													383	961	0	0
																																													609	961	1	0
																																													1031	961	0	0
																																													833	962	0	0
																																													123	966	0	0
																																													1079	966	0	0
																																													315	969	0	0
																																													905	970	0	0
																																													793	973	0	0
																																													878	976	0	0
																																													208	978	0	0
																																													711	978	1	0
																																													1041	981	0	0
																																													615	982	2	1
																																													543	983	0	0
																																													418	984	0	0
																																													976	986	1	0
																																													315	993	1	0
																																													631	994	1	0
																																													887	999	0	0
																																													988	999	1	0
																																													156	1002	0	0
																																													517	1003	0	0
																																													1040	1006	0	0
																																													451	1006	0	0
																																													366	1009	0	0
																																													939	1011	0	0
																																													306	1012	1	0
																																													389	1011	0	0
																																													666	1013	0	0
																																													745	1014	1	0
																																													811	1015	0	0
																																													264	1016	0	0
																																													722	1023	0	0
																																													912	1026	0	0
																																													196	1029	0	0
																																													620	1031	0	0
																																													849	1032	0	0
																																													750	1031	1	0
																																													945	1035	0	0
																																													651	1039	0	0
																																													399	1045	0	0
																																													680	1042	1	0
																																													700	1042	1	0
																																													569	1046	0	0
																																													832	1046	1	0
																																													878	1050	0	0
																																													981	1049	0	0
																																													308	1050	0	0
																																													226	1053	0	0
																																													817	1055	1	0
																																													442	1058	0	0
																																													282	1059	0	0
																																													414	1068	0	0
																																													541	1071	0	0
																																													777	1070	0	0
																																													567	1074	0	0
																																													234	1076	0	0
																																													904	1077	0	0
																																													643	1079	0	0
																																													477	1080	0	0
																																													610	1088	0	0
																																													928	1088	1	0
																																													367	1089	1	0
																																													453	1089	0	0
																																													286	1093	0	0
																																													831	1097	0	0
																																													400	1101	0	0
																																													912	1103	1	0
																																													857	1107	0	0
																																													310	1110	0	0
																																													367	1110	1	0
																																													585	1114	0	0
																																													712	1122	0	0
																																													808	1124	0	0
																																													426	1124	0	0
																																													335	1127	0	0
																																													864	1133	0	0
																																													639	1141	0	0
																																													731	1141	0	0
																																													542	1144	0	0
																																													833	1144	0	0
																																													810	1150	0	0
																																													680	1155	0	0
																																													420	1160	0	0
																																													476	1161	0	0
																																													444	1166	1	0
																																													590	1166	0	0
																																													768	1165	0	0
																																													568	1172	0	0
																																													382	1171	0	0
																																													647	1173	0	0
																																													717	1173	0	0
																																													455	1182	1	0
																																													511	1191	0	0
																																													554	1199	1	0
																																													695	1201	1	0
																																													674	1207	1	0
																																													534	1208	1	0
																																													644	1210	0	0
[truncated: 16 more columns]

## Sheet: Source Fig4C-E
	Nadal-Nicolas et al., eLife 2020
	Source data Figure 4C-E. True S-cone clusters.
	Strain	Pigmented mice (C57BL6)
	Sub-type	True S-cones
	#	1						2						3						4						5						6						7						8
	Area of 1mm Ø	DT			VN			DT			VN			DT			VN			DT			VN			DT			VN			DT			VN			DT			VN			DT			VN
	Total cells/area	87			3469			128			4043			130			3183			180			3967			113			2949			110			3281			64			3067			109			2915
	Cell x,y coordinates	x	y		x	y		x	y		x	y		x	y		x	y		x	y		x	y		x	y		x	y		x	y		x	y		x	y		x	y		x	y		x	y
	1	721	38		586	1		552	23		516	10		636	20		619	2		551	17		613	2		766	23		645	6		463	22		590	1		458	30		640	1		503	29		560	2
	2	539	44		622	3		637	25		665	10		726	120		604	8		504	18		671	5		645	35		712	10		813	47		574	3		826	174		566	6		320	124		663	3
	3	506	96		582	5		472	28		730	15		284	132		612	8		554	24		654	6		708	48		502	12		616	78		666	4		305	182		582	6		667	198		627	6
	4	434	112		586	7		465	36		688	16		802	140		573	10		479	27		678	5		648	48		530	13		297	102		672	6		662	192		532	6		770	212		532	7
	5	677	124		664	8		723	77		504	17		215	146		611	13		397	42		702	11		694	50		692	16		867	131		521	7		620	192		662	6		988	213		660	8
	6	878	143		507	11		912	88		492	18		866	161		627	14		719	58		721	17		685	86		463	18		916	131		562	11		738	201		674	7		634	216		544	15
	7	549	151		598	11		412	92		471	20		338	164		509	14		407	63		681	21		852	97		699	20		703	155		679	11		420	224		591	8		508	223		652	15
	8	820	155		671	10		458	106		708	20		649	174		542	18		438	67		760	20		499	116		476	20		502	160		686	13		293	252		683	10		580	228		735	21
	9	922	156		517	12		616	128		458	24		798	179		480	19		631	68		508	22		430	118		736	22		313	163		585	14		588	320		492	11		127	260		466	20
	10	640	172		628	12		249	143		560	24		669	194		502	19		371	81		688	27		908	118		464	22		539	166		635	15		150	325		692	14		1098	260		543	20
	11	704	172		712	12		225	158		695	24		582	207		537	20		297	89		514	27		852	126		524	23		881	174		591	16		809	326		500	16		493	265		628	22
	12	694	175		531	12		400	192		674	26		255	212		581	21		409	104		464	29		560	139		713	22		473	198		700	16		238	333		566	16		440	275		666	22
	13	479	176		605	12		806	192		776	26		798	218		509	23		483	108		574	28		555	145		612	26		632	202		504	18		533	350		710	16		413	291		450	25
	14	845	191		712	18		583	218		466	28		316	232		672	22		388	113		679	28		696	151		528	28		156	208		672	18		70	367		752	19		268	298		476	25
	15	600	267		613	18		590	218		725	32		1046	236		487	24		267	128		749	30		224	175		642	28		168	213		745	18		110	434		744	20		535	305		672	26
	16	700	288		618	19		232	230		704	32		1084	246		525	24		674	148		564	31		207	259		616	31		552	224		657	20		188	454		724	22		599	315		749	27
	17	156	320		692	19		487	238		620	34		820	254		453	24		688	156		527	33		530	258		476	32		246	246		562	21		66	468		540	25		132	337		594	30
	18	251	346		588	20		788	258		770	36		814	258		455	29		406	161		532	33		789	261		756	32		605	248		519	22		24	490		534	27		644	338		520	31
	19	525	348		628	24		248	261		403	36		132	270		473	28		428	160		554	32		984	265		578	33		924	249		569	24		1092	493		652	28		212	345		710	31
	20	239	352		727	24		285	267		607	37		803	274		552	31		1002	166		580	33		782	286		534	34		591	266		484	25		1001	516		750	28		971	346		625	31
	21	794	361		460	27		310	274		690	36		1098	310		542	30		904	168		608	33		756	290		566	34		219	268		609	25		711	551		438	30		914	363		685	32
	22	972	399		774	28		322	282		562	38		444	330		754	36		427	172		728	33		1100	302		729	35		389	286		723	25		269	584		612	29		595	376		618	34
	23	862	402		504	28		112	298		751	38		360	348		447	36		350	181		469	35		530	334		810	36		1008	289		652	26		762	591		770	31		462	385		423	34
	24	750	408		520	31		540	318		759	39		1133	348		614	36		274	182		514	34		709	346		403	40		558	290		458	27		759	613		790	32		728	387		476	36
	25	854	417		590	31		548	318		392	41		1101	361		789	38		265	190		760	35		800	355		650	40		186	302		696	28		415	648		748	35		1076	402		735	35
	26	446	444		709	30		165	351		436	41		566	363		755	40		594	191		804	35		938	359		454	42		221	302		670	30		883	652		491	37		668	451		501	38
	27	573	466		471	31		712	356		396	42		608	370		812	40		538	195		413	35		1067	360		478	42		557	330		678	31		14	656		540	37		1001	497		774	39
	28	724	467		481	31		1090	356		412	42		541	382		522	41		172	198		398	37		842	365		558	42		396	334		442	33		234	666		762	37		425	505		553	40
	29	84	471		760	32		242	362		428	44		146	385		467	43		577	198		449	37		788	379		683	42		475	347		612	32		822	692		567	39		745	513		568	41
	30	280	472		498	34		530	392		736	44		1077	392		550	43		522	200		660	39		848	398		436	42		226	372		595	34		1196	691		573	41		588	519		628	41
	31	656	476		520	36		292	398		562	46		332	397		798	42		526	207		723	40		946	418		519	42		917	375		477	35		912	694		552	41		568	520		712	42
	32	871	489		691	37		168	404		724	46		501	413		694	44		548	226		474	41		196	421		510	46		531	398		500	36		27	720		722	42		1118	529		593	44
	33	1058	507		780	37		1048	415		377	46		651	414		734	44		578	226		524	40		192	429		537	46		117	412		528	36		705	732		417	45		796	530		769	44
	34	1108	511		793	36		155	419		405	46		294	427		772	44		564	232		792	41		219	438		790	46		533	456		708	36		896	750		810	44		524	534		574	45
	35	430	520		540	38		184	426		670	46		1168	430		536	45		580	234		815	41		704	458		514	48		219	481		539	41		81	797		381	44		1016	545		432	46
	36	1200	522		676	38		1025	433		708	47		1060	442		397	46		881	234		508	42		723	469		730	48		441	483		572	41		906	799		474	46		655	553		747	46
	37	1190	550		510	39		780	479		451	50		941	451		483	45		456	238		500	43		257	469		644	50		818	499		602	40		530	812		763	46		32	576		505	46
	38	642	565		574	39		390	480		595	48		862	454		610	46		426	239		385	44		322	480		526	50		851	529		685	42		627	820		753	47		997	577		588	47
	39	163	574		734	39		340	488		684	49		926	460		633	46		380	240		585	44		347	495		628	51		61	574		500	44		285	823		736	49		462	592		625	47
	40	764	578		550	40		770	494		828	50		315	474		685	46		493	242		646	44		44	502		678	51		1161	592		698	44		496	826		821	50		1002	595		486	48
	41	1206	581		425	42		250	500		365	51		96	478		522	47		963	242		378	45		1153	509		435	52		950	600		491	45		1100	834		548	50		552	600		743	51
	42	564	582		660	43		1166	506		374	52		1066	480		590	47		916	246		477	46		110	512		666	52		118	601		590	45		432	838		455	50		386	607		533	52
	43	555	594		674	43		758	533		538	52		54	484		664	47		590	247		572	46		135	518		698	52		393	616		718	45		703	856		729	52		355	617		702	52
	44	749	602		694	43		211	534		586	52		180	545		377	52		139	248		800	46		1193	524		389	53		594	616		626	46		1038	860		493	52		1119	618		483	54
	45	881	611		386	44		1128	546		800	52		788	549		491	51		485	250		696	47		999	528		399	53		102	634		674	47		114	863		565	53		212	625		758	55
	46	1160	650		381	44		296	548		424	53		1178	550		744	51		865	250		754	47		98	539		826	55		319	648		441	49		702	892		475	54		866	625		477	56
	47	795	653		796	45		465	552		592	54		1190	560		398	53		883	250		565	48		222	542		455	57		905	657		664	51		258	897		599	53		189	638		780	56
	48	1126	683		743	45		222	560		704	54		1097	564		853	54		447	253		816	48		228	543		706	57		108	659		407	52		174	902		488	55		7	648		729	56
	49	42	692		498	47		1110	561		496	57		1034	565		462	55		742	255		441	53		518	564		476	60		1193	660		427	52		610	915		356	56		874	657		501	60
	50	176	699		838	47		49	562		624	57		1078	568		602	54		139	259		478	53		1056	572		747	60		841	668		507	52		292	921		796	56		1092	662		536	62
	51	942	741		730	48		228	568		730	57		1189	572		365	56		1074	260		656	53		1090	576		524	61		262	674		520	52		714	973		837	56		912	694		630	62
	52	901	743		829	49		674	578		678	58		227	576		816	56		504	261		709	52		715	584		376	62		1199	683		724	52		658	980		524	57		660	698		859	62
	53	929	749		445	50		877	580		541	59		802	582		840	55		555	270		370	54		818	585		843	64		318	690		597	53		998	994		535	57		682	703		624	62
	54	342	752		401	51		1176	586		590	60		763	584		595	57		408	273		819	54		579	598		684	65		826	693		578	54		354	1002		742	58		956	727		698	63
	55	908	754		428	52		426	591		772	60		30	608		433	58		441	274		834	56		1031	602		476	66		650	702		854	56		166	1004		684	60		854	738		504	65
	56	756	784		788	53		910	591		443	61		569	619		810	57		504	278		363	58		958	607		459	68		840	710		545	57		1020	1010		388	63		405	738		614	66
	57	917	787		514	54		984	604		370	62		591	619		556	60		415	279		448	58		702	622		698	70		507	712		603	58		798	1024		650	63		722	740		420	68
	58	857	796		642	53		910	622		496	62		320	630		486	62		526	279		610	58		210	624		834	70		848	725		629	57		441	1037		344	64		868	744		445	68
	59	346	797		523	54		848	640		699	62		594	646		602	59		462	280		828	58		796	626		706	72		242	731		786	57		220	1048		698	64		887	745		483	68
	60	433	807		503	55		324	650		434	64		917	645		774	61		216	292		509	60		850	638		324	73		686	742		468	58		267	1073		516	65		1078	756		621	68
	61	1137	819		668	56		308	654		534	64		478	655		858	60		348	292		694	60		289	640		532	74		1092	741		643	58		974	1077		740	66		211	759		370	69
	62	792	826		469	57		33	663		646	64		610	662		508	62		204	296		423	60		617	640		370	75		1144	760		423	59		596	1102		750	66		207	768		629	70
	63	623	829		442	58		280	662		863	65		620	664		680	62		443	300		650	61		406	647		462	75		437	765		561	59		646	1122		337	67		364	769		495	72
	64	752	843		383	59		558	667		404	66		731	666		795	62		365	308		706	60		1112	648		849	74		838	783		593	59		818	1132		767	67		984	769		654	72
	65	1161	846		394	60		138	677		493	67		546	678		360	62		312	310		752	61		355	650		746	76		835	796		349	61					682	68		353	769		615	72
	66	1124	858		713	60		706	694		841	66		202	696		725	62		865	314		853	61		1032	662		384	78		174	804		434	61					842	68		38	771		390	74
	67	183	870		808	60		15	718		645	69		234	704		843	65		490	316		367	62		302	664		420	80		939	804		548	62					372	69		653	784		405	75
	68	388	888		369	61		374	718		330	70		1044	704		356	66		304	316		499	62		74	664		545	79		1025	828		629	62					745	69		966	796		528	75
	69	270	900		862	62		608	727		636	70		712	706		450	66		343	321		774	62		470	665		356	80		994	829		428	63					419	70		1108	810		778	76
	70	1060	906		480	63		502	733		452	70		730	711		865	66		620	324		760	63		1029	670		428	80		998	839		622	64					888	70		503	812		410	77
	71	407	909		417	63		682	733		662	70		89	712		415	68		484	364		595	66		535	692		483	82		97	853		614	66					405	71		726	813		421	77
	72	872	927		817	65		870	732		672	72		752	721		677	68		807	364		610	66		154	704		671	80		495	856		583	67					696	72		166	818		475	77
	73	554	930		493	66		674	736		699	71		1183	722		837	68		799	373		700	66		206	724		841	80		458	861		635	67					803	72		661	827		316	79
	74	432	944		589	67		872	738		403	74		1055	725		858	68		628	398		447	67		116	752		466	81		1117	865		523	68					849	72		177	829		705	79
	75	619	964		370	68		488	766		506	72		38	730		458	71		1023	405		656	66		1186	757		660	80		742	872		548	68					534	72		840	832		658	80
	76	957	978		645	69		42	776		586	72		163	734		508	70		1024	412		330	68		1174	766		820	81		968	879		557	68					387	75		878	842		820	80
	77	243	983		500	70		278	804		856	73		830	742		518	70		716	443		854	69		762	766		878	81		308	887		782	69					447	76		67	878		887	81
	78	712	989		660	69		283	806		355	74		509	745		600	71		580	444		867	69		511	807		686	82		404	900		693	70					453	78		718	883		310	82
	79	654	1004		753	69		895	814		520	74		420	752		726	71		273	455		525	70		1110	818		763	82		182	904		513	70					807	78		135	886		397	82
	80	367	1019		838	70		266	819		688	76		1093	751		702	73		141	460		788	70		520	831		864	82		232	910		620	71					890	78		938	909		454	83
	81	505	1046		807	71		786	822		344	76		252	754		594	74		804	466		601	71		693	860		444	83		82	910		423	72					405	79		741	923		537	84
	82	1003	1055		769	73		94	823		552	76		144	758		776	73		690	470		672	72		94	870		702	83		132	914		662	73					368	80		1076	943		794	84
	83	738	1064		393	75		458	830		652	77		1150	771		320	75		276	471		706	72		368	884		732	83		1010	922		720	73					589	83		960	943		390	86
	84	509	1102		722	75		808	834		726	77		123	775		379	75		666	474		337	74		1115	886		791	83		544	944		476	74					645	80		775	961		848	87
	85	437	1133		715	75		632	837		412	78		723	780		445	75		534	478		439	74		1029	887		490	84		942	953		507	76					430	81		655	973		303	88
	86	437	1171		754	77		64	842		332	79		574	786		548	75		154	481		787	74		559	900		345	85		204	954		871	77					581	81		922	973		542	88
	87	536	1174		774	77		151	850		740	79		559	798		742	75		415	489		446	75		640	911		454	86		221	958		360	77					610	82		386	987		709	91
	88				658	79		344	852		750	78		920	801		867	74		88	507		756	77		810	913		523	89		883	958		377	77					676	82		208	989		407	90
	89				442	80		207	860		834	79		877	804		344	76		453	511		631	76		684	918		494	90		197	968		479	79					850	82		240	992		523	90
	90				747	80		666	863		881	79		455	831		432	77		929	512		428	77		564	923		446	91		1003	974		592	78					322	83		665	1004		693	90
	91				820	80		894	866		684	80		154	842		519	76		28	516		811	77		156	934		346	92		740	977		396	80					389	84		470	1006		872	91
	92				524	81		120	870		368	82		390	846		527	77		840	528		842	77		526	943		548	92		365	978		533	80					878	85		644	1010		621	92
	93				888	81		900	878		660	82		777	847		389	78		89	530		862	77		403	956		436	93		1071	980		747	80					364	87		844	1012		401	92
	94				810	82		685	889		506	82		314	859		494	78		434	551		412	77		684	968		460	94		933	983		800	80					396	87		327	1037		674	93
	95				332	83		878	906		760	84		1015	862		512	79		548	567		489	78		236	988		864	94		580	1021		812	80					607	87		312	1037		376	94
	96				852	83		579	908		403	85		744	870		662	78		444	569		899	79		192	1000		372	95		747	1024		720	81					791	87		964	1045		590	94
	97				405	84		783	908		546	85		532	872		824	78		364	570		516	80		384	1008		744	95		862	1026		783	81					658	88		495	1046		810	94
	98				548	83		280	949		902	84		90	878		897	80		179	571		526	80		341	1010		898	99		572	1028		471	82					448	92		784	1047		338	94
	99				553	84		368	962		302	86		548	882		403	80		252	578		664	80		162	1013		354	100		362	1073		501	82					488	89		521	1066		476	95
	100				520	85		446	984		676	85		823	884		335	81		962	591		686	80		628	1041		434	101		266	1090		844	82					512	89		850	1124		327	96
	101				717	84		706	992		828	87		123	886		421	80		210	595		574	81		597	1047		525	101		420	1094		309	83					722	89		805	1126		779	97
	102				826	85		753	998		466	86		436	894		842	81		945	604		341	82		386	1051		709	101		852	1095		330	83					640	90		918	1126		300	98
	103				418	87		512	1026		484	88		725	898		727	82		930	604		608	82		988	1067		763	100		759	1102		414	83					344	91		483	1152		366	100
	104				731	87		324	1028		332	88		777	904		869	83		167	606		810	82		388	1073		460	102		445	1130		386	84					496	91		763	1154		895	100
	105				426	88		320	1033		668	88		525	905		500	82		663	614		435	83		921	1079		546	102		687	1132		429	84					554	92		455	1160		320	101
	106				613	88		622	1039		881	88		243	907		741	83		1105	616		741	84		896	1092		409	104		665	1139		865	84					718	94		816	1166		375	100
	107				648	88		557	1043		874	88		852	916		450	83		650	624		615	85		529	1110		266	104		443	1144		656	86					300	94		526	1171		774	102
	108				746	88		272	1055		354	90		238	934		707	84		53	631		733	84		585	1118		653	105		454	1146		317	87					306	94		440	1172		446	104
	109				872	88		959	1066		474	91		496	937		880	84		1157	646		520	87		326	1138		920	105		810	1170		550	87					613	94		444	1180		662	105
	110				542	89		602	1066		341	92		389	937		439	84		835	651		903	88		646	1156		684	106		534	1200		460	88					700	93					341	106
	111				310	90		390	1076		693	91		256	945		540	86		169	652		919	88		633	1159		622	108					489	88					499	96					830	106
	112				601	91		722	1077		670	92		632	963		366	86		660	657		536	89		642	1158		807	108					524	88					628	95					900	106
	113				838	90		600	1078		324	94		931	968		375	89		678	657		631	89		593	1194		553	109					592	89					676	96					948	106
	114				885	91		680	1098		602	95		810	990		462	86		7	659		666	91					318	110					802	90					598	96					300	107
	115				320	92		945	1104		755	93		865	996		785	87		31	660		701	89					334	111					894	90					318	97					794	108
	116				433	92		497	1120		372	96		293	997		423	89		15	661		499	90					344	112					690	92					491	97					630	109
	117				527	92		398	1121		298	97		374	998		735	89		32	667		490	90					660	112					907	92					555	98					764	109
	118				638	92		784	1126		316	96		939	1004		652	90		619	670		352	93					291	113					401	94					900	97					927	108
	119				829	91		415	1127		378	96		1008	1008		884	90		978	672		408	94					463	113					573	93					538	98					940	108
	120				344	93		508	1130		352	98		885	1034		616	91		224	674		566	94					922	114					780	93					782	98					485	110
	121				350	93		504	1145		824	98		501	1045		314	94		320	678		694	94					928	114					434	94					284	99					591	111
	122				588	93		721	1148		388	100		730	1080		471	94		630	680		903	96					286	114					469	96					638	100					880	110
	123				719	93		616	1149		474	99		786	1085		520	94		1202	692		329	97					501	115					658	96					748	100					366	113
	124				808	95		416	1178		694	99		394	1087		701	95		624	696		433	96					572	115					740	96					806	100					265	114
	125				360	96		450	1181		462	99		949	1092		713	94		617	697		633	98					539	117					681	98					394	102					736	115
	126				462	96		777	1182		656	102		454	1104		784	94		136	709		722	98					551	118					856	99					689	102					936	115
	127				871	96		703	1183		765	102		734	1112		545	95		154	714		740	99					528	118					938	99					927	103					549	116
	128				395	98		728	1189		509	103		405	1139		792	95		894	720		878	99					314	119					562	100					358	104					687	116
	129				584	97					593	105		851	1146		584	96		810	734		428	99					817	119					802	100					569	105					794	116
	130				449	99					912	104		719	1198		828	97		301	758		834	100					832	119					466	103					366	106					862	116
	131				546	98					349	105					675	98		581	766		404	101					893	119					659	103					666	106					278	118
	132				608	99					816	105					723	97		430	768		520	101					512	121					754	102					855	107					590	119
	133				540	100					463	108					569	99		504	774		749	101					599	120					374	104					906	107					951	118
	134				405	100					745	106					659	99		211	784		798	101					466	122					838	104					390	108					461	120
	135				526	101					925	106					862	98		31	785		830	101					882	123					847	104					774	108					604	120
	136				639	101					573	107					316	100		616	788		458	102					294	124					888	107					880	108					830	120
	137				846	102					622	107					582	101		387	791		514	101					325	124					476	108					788	109					452	121
	138				786	102					690	108					520	102		556	806		561	102					270	126					514	108					810	109					546	121
	139				808	103					758	108					612	102		557	823		668	102					772	126					368	109					752	110					343	121
	140				415	104					512	110					932	101		986	823		806	103					506	127					626	111					325	110					695	123
	141				520	104					719	109					648	103		422	838		353	102					539	127					430	112					470	111					937	123
	142				650	104					934	108					556	104		82	846		767	103					668	127					720	112					551	111					567	124
	143				440	104					606	110					884	104		922	876		371	104					532	128					762	112					363	112					856	124
	144				725	106					328	110					270	105		932	877		418	105					710	128					398	113					488	112					865	124
	145				618	106					408	110					470	106		838	894		695	105					243	129					409	113					707	112					891	126
	146				720	107					899	110					621	105		686	898		818	105					767	129					469	113					386	114					537	127
	147				872	106					905	111					729	106		723	899		456	107					859	128					254	114					615	114					407	128
	148				275	108					358	112					338	107		690	902		589	106					331	130					326	115					924	113					725	128
	149				760	108					924	112					356	107		1019	902		688	106					513	130					476	115					439	116					941	128
	150				424	110					273	112					374	106		258	918		930	107					284	131					530	115					580	116					381	129
	151				848	110					351	113					639	108		876	918		938	106					468	131					656	115					256	117					305	130
	152				856	110					818	113					836	106		404	928		426	108					643	130					461	116					418	118					459	130
	153				622	111					393	113					278	108		715	934		746	108					715	132					502	117					512	118					486	130
	154				404	112					568	114					403	108		461	936		801	108					391	134					494	118					550	119					380	134
	155				396	113					620	113					466	108		117	958		751	109					631	134					738	118					934	119					680	134
	156				440	113					487	114					346	109		782	962		764	109					679	134					821	118					454	120					920	134
	157				461	112					448	116					441	109		273	973		860	109					841	135					296	119					469	119					322	137
	158				636	112					524	117					862	108		354	982		895	109					858	135					432	120					576	121					854	137
	159				877	114					752	116					648	109		139	986		306	110					252	137					444	120					906	121					267	138
	160				943	114					561	117					725	110		340	988		559	109					422	137					470	120					930	121					440	139
	161				766	115					824	118					734	110		1051	1003		598	110					491	137					528	120					606	122					646	138
	162				802	115					275	119					505	111		223	1005		416	111					275	138					625	120					646	122					891	140
	163				809	115					838	118					950	111		898	1010		445	111					452	139					552	121					818	122					383	141
	164				481	116					260	119					364	114		484	1011		511	110					827	139					900	121					859	122					726	141
	165				581	117					484	120					406	114		867	1010		656	111					838	139					501	122					718	123					792	140
	166				324	118					656	120					424	114		451	1025		438	112					442	140					784	124					570	125					966	140
	167				592	118					954	120					380	115		631	1026		787	111					460	140					861	124					284	126					972	140
	168				930	118					322	122					742	114		814	1028		794	112					582	141					290	125					298	128					902	142
	169				744	119					408	122					297	116		496	1031		921	112					593	142					575	125					466	129					427	143
	170				458	120					519	122					678	116		401	1034		350	113					746	142					243	126					621	129					684	145
	171				832	120					557	122					864	116		396	1039		365	113					930	142					351	126					713	128					477	147
	172				275	121					700	122					454	116		614	1041		387	112					256	144					597	126					241	129					658	146
	173				732	122					478	123					486	116		340	1046		626	113					626	144					969	126					808	130					676	148
	174				822	122					934	124					646	117		270	1058		726	113					738	144					422	128					406	130					744	148
	175				581	124					342	124					339	118		654	1085		394	114					817	144					464	126					718	133					767	148
	176				769	124					752	125					897	118		300	1105		426	114					416	146					477	128					514	132					773	150
	177				905	124					529	126					787	119		612	1152		911	114					514	146					437	129					767	132					928	150
	178				410	125					648	126					366	121		752	1168		380	115					759	146					566	129					844	132					957	150
	179				418	125					892	126					297	122		689	1204		666	115					849	146					326	130					390	136					736	150
	180				876	124					371	127					325	121		608	1212		676	115					429	147					675	131					428	134					938	151
	181				883	126					544	127					388	122					904	115					506	147					976	130					344	135					994	150
	182				349	128					714	126					686	122					420	116					521	146					696	132					774	135					284	152
	183				401	128					500	128					543	122					556	117					696	148					376	133					626	136					370	152
	184				750	128					688	128					626	122					608	117					396	149					431	134					837	136					214	152
	185				911	128					788	127					408	125					844	117					970	149					549	133					680	138					380	153
	186				949	128					954	128					794	125					507	118					489	150					398	134					786	137					526	154
	187				739	128					288	129					254	126					512	119					587	150					416	134					890	142					550	154
	188				798	129					377	130					302	126					262	120					635	150					538	134					434	139					884	154
	189				835	129					946	130					480	127					285	120					420	151					468	135					448	139					1006	155
	190				689	130					388	131					544	128					469	120					346	153					478	135					520	139					687	156
	191				775	130					568	132					665	128					698	121					530	154					824	137					722	138					739	155
	192				361	132					628	132					250	129					554	122					582	154					850	138					864	138					780	156
	193				644	133					696	131					801	129					937	121					428	156					328	138					803	140					865	156
	194				454	135					517	134					748	130					544	123					537	157					482	139					408	141					696	158
	195				954	135					548	134					790	130					664	123					682	156					441	140					630	141					747	158
	196				460	136					780	134					936	130					794	123					782	157					764	141					524	142					906	158
	197				912	136					927	133					245	132					536	123					377	158					970	142					762	142					286	159
	198				892	138					319	134					339	132					606	124					515	160					415	142					452	143					834	158
	199				631	139					326	134					370	132					940	124					352	160					459	142					578	142					663	160
	200				673	138					457	135					796	132					316	125					1012	161					646	142					612	143					983	159
	201				875	138					420	136					810	131					383	124					586	163					833	141					744	144					441	160
	202				804	140					372	136					818	131					477	125					244	164					788	142					504	145					794	162
	203				455	141					761	136					946	132					514	125					420	167					346	143					658	146					940	162
	204				509	140					873	138					305	133					726	125					745	167					578	144					724	146					398	162
	205				529	141					970	137					326	132					932	125					188	168					608	144					376	147					869	163
	206				344	141					294	138					489	134					803	126					253	168					729	144					487	146					954	163
	207				474	142					574	138					771	134					960	126					474	168					448	145					493	146					212	164
	208				742	141					601	137					864	132					365	127					637	168					410	147					680	147					454	164
	209				762	142					942	138					544	134					869	126					482	169					760	147					704	148					754	164
	210				232	144					951	140					252	135					279	128					724	169					367	148					631	148					841	164
	211				459	144					278	140					313	135					284	128					596	170					935	148					643	148					850	164
	212				269	145					304	141					556	134					715	128					197	171					642	148					380	149					916	164
	213				421	145					890	142					898	136					732	128					891	172					902	149					436	149					286	166
	214				808	145					260	143					828	136					438	129					646	173					474	150					575	149					675	166
	215				536	145					556	143					834	137					924	129					756	173					524	150					618	149					606	167
	216				670	147					804	142					355	138					605	131					221	175					577	150					366	149					646	167
	217				826	146					920	144					398	137					702	131					989	175					588	149					654	150					668	167
	218				607	148					241	145					710	139					770	131					473	176					499	151					688	150					256	168
	219				902	148					406	145					258	139					259	132					488	176					834	151					958	150					828	168
	220				504	148					761	144					555	139					360	132					266	177					980	150					612	152					876	168
	221				530	148					776	145					622	142					764	132					301	177					795	152					793	151					214	169
	222				700	148					386	146					230	142					847	132					345	177					855	151					825	152					292	170
	223				784	150					433	146					842	142					953	132					510	178					893	152					268	153					424	170
	224				363	150					647	146					378	142					977	132					398	180					275	153					397	153					468	170
	225				373	150					310	147					694	143					314	134					864	181					518	152					456	153					1025	170
	226				466	152					379	147					864	144					523	134					228	182					544	152					748	153					378	171
	227				834	152					512	148					902	142					553	134					314	182					618	152					854	153					553	171
	228				572	153					656	151					438	144					426	135					770	182					811	154					970	153					638	170
	229				504	154					860	150					561	144					252	136					194	183					507	154					558	154					679	171
	230				650	154					959	151					587	144					507	136					201	183					776	155					986	154					849	170
	231				876	154					211	151					324	145					851	136					594	183					803	155					382	155					1016	170
	232				400	154					772	152					430	144					681	137					711	182					359	156					594	155					593	171
	233				471	154					865	152					920	145					420	138					853	183					396	156					370	156					322	173
	234				622	157					232	152					929	146					540	138					859	183					613	156					430	156					687	173
	235				670	158					259	153					690	146					740	138					307	184					655	156					934	156					877	172
	236				634	159					596	152					987	146					469	139					428	184					681	157					919	157					380	176
	237				458	160					680	155					222	148					981	139					884	184					387	158					966	157					427	176
	238				832	160					736	152					333	148					247	140					237	184					755	157					306	158					627	176
	239				212	160					241	154					494	148					795	140					263	184					994	159					357	158					1029	176
	240				655	161					979	154					646	148					278	140					444	185					318	159					744	158					446	178
	241				712	161					985	153					953	148					310	141					506	185					366	160					848	158					505	178
	242				570	162					727	155					995	149					428	143					640	185					479	160					698	160					851	178
	243				676	162					758	155					318	150					510	143					846	185					902	160					466	163					957	178
	244				234	163					381	157					362	150					639	142					292	186					998	160					582	160					793	178
	245				477	162					398	158					376	150					292	144					359	186					427	160					602	162					941	180
	246				758	163					413	158					598	150					357	144					370	186					486	161					664	161					176	181
	247				643	164					826	158					700	154					446	144					374	186					529	161					902	162					209	181
	248				800	164					201	158					215	155					679	144					380	187					450	162					224	164					227	181
	249				834	166					652	158					448	154					232	145					819	187					789	162					378	162					470	182
	250				878	166					658	160					735	155					600	145					1018	187					457	163					428	165					323	183
	251				366	168					466	161					751	155					662	145					208	189					355	164					916	165					480	184
	252				528	168					646	161					800	154					239	146					620	189					585	164					934	165					1020	184
	253				714	168					737	161					916	154					349	146					775	189					1021	165					1010	164					208	186
	254				194	169					884	160					943	154					413	146					336	190					896	164					354	165					264	186
	255				211	168					980	160					368	155					479	146					545	190					282	166					698	167					354	186
	256				304	168					356	162					494	156					848	146					596	190					350	166					194	167					768	186
	257				568	169					487	161					788	156					269	147					390	191					411	166					269	166					799	186
	258				606	169					576	161					860	158					283	147					198	192					866	167					306	167					808	186
	259				638	169					600	162					967	156					308	147					323	192					882	168					768	167					863	187
	260				206	170					961	162					725	158					923	147					398	192					965	168					820	167					945	187
	261				285	169					258	163					243	158					220	148					298	193					276	169					284	170					845	188
	262				359	171					664	163					457	160					892	148					366	193					584	169					444	170					1041	188
	263				964	170					888	162					496	160					938	148					429	193					758	168					1013	170					298	191
	264				634	172					296	164					196	162					211	148					344	194					768	169					216	171					569	191
	265				800	172					567	163					973	162					379	148					506	195					248	169					234	171					892	192
	266				463	173					806	164					262	162					364	149					538	195					607	170					340	171					478	193
	267				484	172					894	164					880	162					609	150					696	195					782	170					588	175					606	193
	268				533	172					223	166					927	162					679	150					208	196					288	171					626	171					682	193
	269				806	173					318	166					526	164					971	150					518	196					692	172					498	171					865	192
	270				816	173					484	166					632	164					665	151					977	197					847	172					714	173					440	194
	271				202	174					494	167					510	164					952	151					338	196					940	172					955	173					629	194
	272				837	174					852	166					274	166					470	152					372	197					183	172					651	174					834	194
	273				900	174					210	167					698	166					598	152					656	197					243	173					933	174					176	195
	274				1015	174					426	168					888	166					413	153					400	199					895	173					303	176					516	195
	275				284	176					574	168					251	166					656	153					436	198					535	175					878	175					640	195
	276				726	176					611	168					436	167					701	153					726	199					742	175					415	176					853	194
	277				960	176					928	168					560	167					710	152					835	198					809	175					484	176					361	195
	278				869	176					678	169					576	167					284	154					850	199					928	175					518	177					596	196
	279				984	176					714	168					660	168					409	154					919	198					392	176					757	178					900	196
	280				997	176					776	168					692	168					466	154					191	200					689	176					175	180					907	196
	281				1005	177					363	170					457	168					696	154					864	200					853	175					478	179					379	199
	282				638	178					386	170					705	168					349	154					266	202					429	176					748	180					693	198
	283				704	178					637	169					1012	170					545	155					370	202					603	177					824	180					624	200
	284				906	178					668	170					718	170					640	155					561	202					184	178					920	181					632	200
	285				538	179					816	170					334	170					915	154					687	202					357	178					259	181					725	201
	286				330	180					434	170					650	170					432	156					1000	203					769	178					266	181					938	201
	287				592	180					740	171					726	170					784	156					329	204					847	178					336	182					973	200
	288				634	182					216	172					982	171					815	155					164	205					493	180					178	183					478	202
	289				1027	182					628	172					585	171					920	156					498	205					293	180					406	183					688	202
	290				726	183					952	172					894	172					219	157					620	205					524	181					762	184					739	202
	291				852	183					254	174					278	172					335	157					346	206					200	183					1020	184					751	202
	292				925	182					296	174					746	173					806	157					951	205					896	182					470	184					470	202
	293				968	183					372	174					346	174					878	157					442	207					1006	182					502	185					716	203
	294				416	185					854	173					368	174					518	158					680	207					271	184					532	185					922	203
	295				490	184					614	174					534	174					596	158					959	207					316	184					690	185					448	204
	296				553	185					494	176					546	175					892	158					551	208					982	184					632	186					387	204
	297				286	186					904	177					696	175					661	158					992	208					590	186					773	186					515	205
	298				384	186					1014	178					326	176					1002	159					253	208					654	186					784	186					598	205
	299				840	186					210	178					704	176					634	160					266	210					666	186					931	186					654	204
	300				912	185					332	178					766	176					686	160					337	210					750	185					329	186					695	204
	301				767	186					375	179					235	177					946	160					560	210					1023	186					404	188					340	206
	302				906	187					542	179					868	176					391	161					367	211					194	186					518	187					910	206
	303				344	188					815	179					940	177					404	161					702	210					454	186					828	187					1049	206
	304				353	187					730	180					272	178					656	161					875	211					272	188					353	187					530	207
	305				614	188					738	180					472	178					707	161					384	212					639	188					614	188					544	207
	306				999	188					897	180					481	178					930	161					352	213					423	189					946	189					626	206
	307				429	189					666	181					633	180					994	161					790	212					428	189					916	190					158	208
	308				721	189					922	182					658	178					326	162					854	213					556	188					484	191					890	208
	309				855	188					936	182					1034	178					348	161					378	215					866	190					580	191					320	208
	310				1028	189					254	183					242	179					723	162					640	215					959	190					518	193					639	210
	311				364	190					458	182					358	179					798	162					389	216					376	191					614	193					952	210
	312				606	190					794	183					509	178					822	162					827	216					500	191					690	193					165	210
	313				443	191					216	184					928	178					962	162					278	217					775	190					162	194					449	210
	314				463	190					844	184					261	180					816	162					142	218					797	191					450	194					294	213
	315				969	191					190	185					795	180					834	163					170	218					739	192					590	194					542	213
	316				1042	191					436	184					248	181					334	164					563	218					310	193					684	194					704	213
	317				929	193					744	184					556	182					513	164					1032	218					325	193					234	195					1048	213
	318				243	194					914	184					562	182					620	164					465	219					341	193					530	195					258	214
	319				654	194					496	186					612	182					309	165					790	219					447	192					852	195					743	214
	320				266	194					752	185					212	182					609	164					878	219					984	194					990	195					751	214
	321				759	195					890	185					326	183					728	164					536	220					273	194					200	196					781	214
	322				918	194					172	186					448	184					1012	164					184	221					368	195					341	196					328	214
	323				863	195					374	187					575	182					920	166					292	220					428	195					788	196					529	214
	324				360	196					413	186					664	182					248	166					383	221					749	195					211	197					584	215
	325				614	197					898	186					740	182					640	167					426	221					554	196					830	197					914	215
	326				636	197					1008	186					828	183					788	167					844	221					650	196					847	198					427	216
	327				802	196					402	188					856	183					1022	166					195	222					821	196					985	199					566	216
	328				855	198					178	188					433	184					437	168					392	222					1049	196					334	200					690	217
	329				1001	198					502	189					232	185					442	169					358	223					313	199					418	199					1001	217
	330				1042	198					800	188					300	184					942	169					683	222					396	199					654	200					664	217
	331				194	198					622	190					502	185					310	170					654	224					508	199					740	200					468	218
	332				382	200					771	190					455	186					626	171					600	226					550	199					542	201					685	219
	333				557	200					866	190					270	187					822	171					638	226					867	199					517	201					876	219
	334				769	200					329	190					470	187					206	172					792	226					260	200					302	203					364	220
	335				495	201					726	191					690	188					493	172					949	225					926	199					682	203					659	220
	336				912	201					210	192					774	188					726	172					232	227					755	200					341	203					904	220
	337				248	202					185	192					202	188					336	173					324	227					874	201					202	205					962	220
	338				420	202					616	193					748	188					394	173					563	227					474	202					898	205					774	221
	339				627	202					218	194					792	188					934	173					720	228					256	202					408	206					810	221
	340				348	203					403	194					871	188					578	174					858	227					296	203					534	206					1025	220
	341				394	202					440	194					366	189					699	174					878	228					329	202					379	207					497	222
	342				594	202					515	193					491	188					960	175					413	229					451	204					566	207					756	224
	343				616	203					628	194					286	190					1020	175					481	229					425	204					776	207					693	225
	344				810	203					839	194					561	190					415	176					154	230					527	204					671	207					1029	226
	345				310	205					654	195					394	191					436	176					279	230					784	204					884	208					273	226
	346				724	204					191	197					970	190					584	176					435	230					652	205					317	209					421	226
	347				758	205					262	196					994	190					642	176					956	230					154	206					492	210					512	226
	348				794	206					320	195					614	194					306	176					294	231					171	206					510	209					260	228
	349				870	206					923	196					824	192					224	178					398	230					212	206					198	210					747	228
	350				952	206					500	197					794	194					329	178					625	230					388	206					291	210					801	228
	351				636	206					796	196					1036	194					460	178					946	231					401	206					458	209					526	229
	352				160	208					951	197					809	194					488	177					495	232					507	205					470	210					710	229
	353				415	208					584	198					402	195					249	179					1054	232					672	206					236	210					462	230
	354				738	208					626	198					304	197					453	179					220	233					690	206					240	210					638	231
	355				1004	208					826	198					390	196					614	179					1030	233					706	206					254	210					761	231
	356				564	209					1007	198					758	196					444	180					324	234					714	206					1032	211					294	232
	357				622	209					854	198					199	198					781	180					786	234					270	207					598	212					1074	232
	358				748	209					880	199					227	198					925	180					570	235					534	207					330	212					162	233
	359				1054	209					702	200					628	198					430	181					897	235					964	206					418	213					256	234
	360				457	210					938	200					636	198					989	181					233	236					759	208					617	212					384	234
	361				1040	209					332	201					704	199					518	182					515	236					816	208					876	213					284	234
	362				754	212					475	200					284	200					679	182					794	236					608	209					218	214					625	235
	363				243	213					487	201					468	200					875	182					154	237					418	210					412	213					988	235
	364				737	212					886	201					220	200					571	182					424	237					488	210					754	214					1036	235
	365				796	212					898	201					269	202					305	184					442	237					935	210					242	215					221	236
	366				209	214					956	201					328	201					328	183					585	237					444	210					495	215					661	236
	367				309	215					792	202					408	200					497	183					833	236					564	213					634	216					747	236
	368				340	214					734	203					558	200					505	184					139	238					991	212					989	218					778	236
	369				1051	214					842	203					181	202					513	184					212	238					857	212					759	216					465	236
	370				420	215					349	204					428	202					668	184					270	239					1006	214					894	216					1018	236
	371				574	215					557	205					440	202					1035	184					728	239					187	214					382	217					127	238
	372				640	215					576	204					502	202					274	186					373	240					212	214					669	217					589	240
	373				271	217					980	204					774	202					981	186					878	240					300	214					490	218					1011	240
	374				705	216					497	206					1003	203					251	186					885	240					650	214					862	218					692	241
	375				933	216					1030	206					304	204					416	187					365	240					1048	214					1030	218					980	240
	376				962	216					1040	206					754	204					440	187					548	241					412	214					970	219					654	242
	377				876	218					388	206					1036	205					611	187					138	242					493	215					210	220					326	243
	378				669	218					929	207					414	204					640	187					238	242					591	215					246	220					597	242
	379				882	219					290	208					816	204					555	188					320	242					984	215					650	220					774	243
	380				459	220					701	207					240	206					866	188					329	242					1017	215					869	220					1001	243
	381				702	220					509	208					664	206					228	189					474	242					147	216					254	221					221	244
	382				809	220					792	209					274	208					462	188					578	242					832	216					369	222					535	244
	383				857	221					992	208					570	208					528	189					719	242					381	217					419	222					800	244
	384				389	221					275	209					1012	208					776	189					302	243					440	216					306	223					838	244
	385				609	222					337	210					564	209					900	189					525	243					885	217					678	223					264	245
	386				692	221					825	210					829	208					916	188					743	242					471	218					575	223					530	245
	387				400	223					890	210					842	210					264	190					788	243					480	218					620	224					228	246
	388				506	223					186	210					466	212					369	189					991	243					779	217					644	224					270	246
	389				962	224					494	212					890	210					730	190					464	244					160	219					827	224					496	246
	390				190	224					743	211					1057	210					332	191					1002	243					358	219					266	225					651	246
	391				318	225					478	212					672	212					794	191					750	245					828	219					321	225					148	246
	392				360	224					629	213					219	214					1019	191					249	246					845	218					358	225					162	247
	393				412	224					970	212					230	212					1027	190					553	246					857	218					760	226					234	246
	394				696	225					258	214					779	212					414	192					590	246					391	220					154	225					404	247
	395				1010	225					853	214					1034	213					833	191					736	246					929	220					752	226					509	248
	396				254	226					196	214					526	214					969	192					1012	246					1037	220					822	226					644	248
	397				718	226					826	214					660	215					359	193					403	248					1064	220					135	227					940	248
	398				136	227					455	216					210	215					449	193					1039	246					184	221					182	227					1079	248
	399				642	226					1020	216					460	216					517	194					315	248					267	220					312	227					461	248
	400				450	228					297	218					797	216					768	194					356	248					510	222					796	227					563	248
	401				610	229					652	217					804	216					505	195					449	248					591	221					410	228					684	248
	402				754	229					788	217					596	216					883	195					548	248					647	222					918	228					738	249
	403				906	229					843	218					216	218					172	197					902	248					658	222					1044	228					484	250
	404				201	230					888	218					282	218					753	196					1044	248					401	223					259	229					808	250
	405				374	230					208	218					582	218					992	196					531	249					711	222					667	230					1004	250
	406				776	230					422	218					915	218					379	197					831	248					1026	223					778	230					167	251
	407				732	232					157	219					372	218					463	197					613	250					1057	222					178	230					383	250
	408				1019	232					644	222					791	220					607	196					727	250					200	224					580	229					432	251
	409				825	232					1038	222					254	220					838	197					746	251					268	225					702	230					650	251
	410				831	233					282	223					334	220					888	197					863	251					766	225					909	231					856	251
	411				968	232					328	223					435	220					162	198					1010	251					276	226					677	233					1087	251
	412				1026	232					550	222					638	221					239	198					586	252					283	226					992	232					298	252
	413				146	234					778	222					670	221					632	198					158	254					780	226					223	234					728	252
	414				382	234					1020	223					856	220					659	198					412	254					869	226					790	233					190	253
	415				1048	234					469	224					388	220					688	197					511	254					880	226					1004	232					214	253
	416				408	235					649	224					506	220					1011	198					904	254					304	226					836	234					478	254
	417				872	235					879	223					737	221					645	199					168	255					758	227					269	235					494	254
	418				910	234					138	225					732	222					670	199					214	255					453	228					380	235					742	254
	419				1076	234					174	224					516	223					700	198					255	254					488	228					593	236					702	255
	420				157	236					302	224					696	222					227	200					423	255					1007	228					863	236					206	256
	421				784	236					852	224					821	222					620	200					968	255					1041	228					430	241					640	256
	422				839	237					544	226					937	224					957	200					558	256					277	230					738	238					866	255
	423				1070	236					1046	225					255	226					498	201					396	257					586	230					787	238					582	257
	424				218	237					624	227					288	225					506	202					404	257					1022	230					976	238					901	257
	425				815	236					992	226					524	225					898	202					534	257					828	231					208	239					1100	256
	426				743	237					134	228					988	224					986	202					699	256					261	232					444	239					246	258
	427				574	238					211	228					720	226					207	203					322	258					344	232					460	239					792	258
	428				286	240					588	228					910	226					269	203					432	258					444	232					602	240					406	260
	429				658	240					840	228					182	227					946	202					661	258					955	232					438	241					818	260
	430				324	240					875	228					840	226					279	204					846	259					149	233					450	241					346	261
	431				593	240					398	228					232	228					318	204					181	260					314	233					538	241					895	261
	432				822	241					698	229					420	228					653	204					308	260					572	233					236	241					288	262
	433				580	242					895	229					470	228					730	204					214	262					643	233					292	242					523	262
	434				831	242					918	229					672	230					387	205					502	261					870	233					656	242					826	262
	435				280	243					236	230					766	230					326	206					657	262					246	234					1013	242					917	262
	436				603	243					574	230					930	230					662	206					708	262					1081	234					246	243					110	263
	437				951	243					786	229					958	230					695	205					720	262					276	236					285	242					461	265
	438				692	245					792	230					312	231					940	206					958	261					484	236					581	244					622	264
	439				747	245					331	230					554	230					1010	206					174	263					741	235					794	244					232	266
	440				473	246					614	231					695	230					372	207					651	262					757	235					1018	244					260	266
	441				757	246					820	231					973	232					478	207					840	262					404	236					219	244					147	266
	442				792	246					967	231					647	232					535	207					1056	264					653	236					260	247					710	268
	443				839	246					1003	231					232	234					1004	207					290	264					820	236					670	245					702	269
	444				391	246					1039	232					262	234					439	208					685	264					259	237					777	245					343	270
	445				398	247					372	232					945	234					454	208					728	264					243	238					698	246					353	270
	446				913	247					833	233					438	236					526	208					800	265					598	238					954	246					236	270
	447				1023	246					992	233					472	236					592	208					934	265					543	239					384	248					406	270
	448				644	248					280	234					786	236					401	208					1094	265					592	238					622	248					874	271
	449				710	248					515	235					904	237					493	209					364	266					494	240					748	248					435	272
	450				740	248					544	234					1024	236					580	208					436	266					513	240					132	249					502	272
	451				779	247					894	234					278	237					1044	209					628	267					641	240					347	248					509	274
	452				878	248					151	236					286	237					154	210					742	266					709	240					457	250					378	274
	453				244	248					270	236					426	236					543	209					253	268					893	240					570	249					600	275
	454				376	248					662	236					252	238					630	210					768	268					934	240					597	249					705	275
	455				385	249					178	238					924	238					206	211					861	268					145	241					311	249					956	276
	456				588	249					388	236					177	240					289	210					705	268					627	241					846	250					997	276
	457				765	249					399	237					220	240					726	211					972	270					366	242					534	251					582	277
	458				429	249					714	237					568	240					312	211					332	270					458	242					210	252					621	278
	459				598	250					828	236					1080	240					326	212					569	270					755	242					270	252					639	278
	460				700	250					912	236					404	241					554	212					208	271					796	242					710	252					503	278
	461				927	250					1019	238					453	241					690	212					298	271					871	242					944	252					532	279
	462				450	251					254	238					936	242					835	212					913	271					568	243					1065	252					1107	279
	463				785	251					503	238					822	242					428	213					356	273					503	243					276	253					222	280
	464				574	252					573	237					994	242					682	213					511	273					1048	244					729	253					630	281
	465				773	252					720	238					394	244					750	213					711	274					126	244					806	254					768	281
	466				969	252					730	238					560	244					220	213					871	274					512	245					260	255					949	281
	467				510	252					204	240					185	244					388	214					1082	275					710	245					394	256					1022	281
	468				557	252					368	239					476	244					767	214					542	276					257	246					496	255					1068	281
	469				795	253					610	238					534	244					286	215					842	276					586	246					234	256					1118	280
	470				1004	252					739	238					1074	245					304	215					986	277					787	246					304	256					873	282
	471				140	254					1030	239					289	246					490	215					755	278					954	246					801	256					1086	282
	472				200	254					327	240					341	246					504	215					174	279					158	247					590	257					701	282
	473				732	253					644	240					969	246					884	215					329	278					426	247					823	257					1094	283
	474				746	254					155	241					276	246					274	216					613	278					451	247					874	257					463	284
	475				1066	254					448	241					318	247					458	216					912	279					475	247					958	257					939	284
	476				167	255					880	242					526	246					800	216					977	279					684	247					144	257					856	284
	477				400	255					734	243					885	246					812	216					1006	279					1011	247					984	258					749	286
	478				954	254					542	244					191	247					634	216					97	280					1081	247					317	259					207	287
	479				1079	256					620	244					641	248					1060	217					286	280					359	248					464	259					517	287
	480				283	256					846	244					798	248					412	218					570	281					538	248					710	259					707	287
	481				606	257					163	244					212	249					433	218					858	280					142	249					206	260					526	288
	482				626	256					261	245					230	248					494	218					261	282					284	249					386	259					553	288
	483				879	256					662	244					468	248					572	217					528	282					599	249					740	260					897	288
	484				336	258					456	246					264	250					762	218					874	282					498	250					480	261					259	288
	485				522	258					596	246					1032	250					939	218					207	283					119	251					868	261					302	288
	486				294	258					888	246					449	250					1004	218					348	283					679	251					139	261					825	289
	487				132	260					931	245					945	251					1068	218					376	283					846	251					1082	262					960	289
	488				770	260					1005	245					330	254					152	219					635	282					201	252					230	263					996	289
	489				376	260					182	247					344	254					652	219					728	283					232	252					424	263					414	290
	490				227	262					131	248					1000	254					704	218					904	283					898	252					500	263					506	290
	491				620	262					157	248					410	254					142	220					1001	283					1086	252					820	263					1019	290
	492				778	262					492	248					534	254					170	220					1066	283					280	253					1012	263					178	290
	493				926	262					685	248					582	256					424	220					705	284					707	254					546	263					751	291
	494				113	262					373	248					1034	256					821	220					749	284					348	255					921	264					848	290
	495				909	263					773	249					962	257					830	220					886	286					595	254					935	264					912	291
	496				106	264					798	250					190	258					343	221					821	286					976	254					239	264					1043	291
	497				759	264					894	250					373	258					634	221					1017	287					1038	255					559	266					326	291
	498				1091	263					1062	250					802	258					720	221					465	288					163	256					798	265					512	292
	499				524	265					704	251					136	258					448	222					550	288					1042	256					1045	265					560	292
	500				808	265					683	252					167	258					804	222					797	288					447	257					154	266					107	292
	501				868	264					539	253					282	258					301	222					264	289					985	256					300	266					1092	292
	502				392	266					588	253					378	258					373	222					631	289					228	258					684	266					274	294
	503				178	267					662	252					900	258					558	222					831	289					277	257					134	267					491	294
	504				197	266					832	252					986	259					783	223					906	288					343	258					930	267					900	294
	505				326	267					256	253					262	260					870	223					1100	289					634	260					675	268					282	296
	506				350	267					644	254					474	261					1008	223					368	290					900	260					696	268					430	295
	507				994	268					968	254					662	260					546	224					191	292					471	261					880	268					687	296
	508				1108	268					1025	254					725	260					241	225					767	292					862	261					1022	268					576	297
	509				279	270					416	255					360	261					271	225					448	293					875	261					1030	268					657	297
	510				508	271					165	257					490	260					533	225					582	292					422	262					372	269					850	297
	511				955	272					179	256					874	260					616	224					110	294					680	262					398	269					606	298
	512				964	272					488	256					301	262					665	225					532	294					797	262					403	269					499	298
	513				1064	272					494	256					711	262					606	226					591	294					165	263					914	269					1070	298
	514				1101	272					207	256					1041	262					766	226					1012	294					414	263					168	270					270	300
	515				296	273					454	256					114	262					936	226					1092	294					255	264					232	270					321	300
	516				330	273					150	258					130	262					232	226					205	296					443	264					568	270					474	300
	517				390	272					436	258					268	262					344	227					540	296					765	264					580	270					560	300
	518				816	273					598	257					672	263					627	226					101	297					136	267					772	270					584	300
	519				188	274					1033	258					954	262					647	227					256	297					147	266					922	270					635	300
	520				291	274					1084	258					155	264					787	227					288	296					182	267					138	271					748	300
	521				306	275					112	260					108	265					952	226					762	297					618	266					506	271					278	301
	522				486	274					159	259					139	264					598	228					808	297					219	268					711	270					328	301
	523				534	275					683	259					824	264					1027	228					326	298					364	270					866	271					356	301
	524				146	277					712	258					407	266					191	229					706	298					719	270					957	271					944	301
	525				343	276					304	260					294	266					576	229					841	298					976	271					1012	271					1042	300
	526				494	277					1024	260					650	266					591	229					199	299					356	272					556	272					103	303
	527				960	277					324	261					736	267					442	230					556	299					322	272					200	273					984	302
	528				1110	276					929	260					889	266					224	231					456	300					380	273					236	273					1101	303
	529				514	278					705	262					953	267					809	230					464	300					536	273					664	274					720	303
	530				623	278					879	261					977	266					874	230					517	300					816	273					808	273					1073	304
	531				911	278					962	262					817	268					1040	230					938	300					862	272					686	274					139	305
	532				945	278					990	262					224	270					180	232					598	301					146	275					820	274					253	305
	533				446	280					916	262					400	270					249	232					476	302					286	273					1040	274					622	305
	534				596	280					234	264					766	270					294	232					496	302					570	274					1062	274					696	305
	535				278	281					484	264					550	271					306	232					828	302					782	275					116	275					915	305
	536				716	280					866	264					946	272					681	232					770	302					434	276					278	276					316	306
	537				759	280					908	263					1067	272					994	232					210	304					352	277					506	276					441	305
	538				783	280					1080	263					728	272					618	233					628	304					375	277					555	277					353	307
	539				855	280					128	265					865	273					168	235					106	305					592	277					179	277					535	306
	540				208	282					511	264					972	273					934	234					580	305					716	277					458	277					1090	306
	541				499	282					1029	265					322	275					952	234					860	305					849	276					900	278					801	307
	542				570	282					286	266					560	274					1002	234					900	305					930	278					146	279					902	309
	543				321	282					470	266					662	274					1080	234					979	306					206	278					526	278					1027	309
	544				374	283					930	266					754	274					348	235					266	308					420	278					950	279					131	309
	545				580	283					262	266					405	276					410	235					322	308					490	278					346	280					610	310
	546				629	282					325	267					691	275					466	235					338	308					684	277					539	279					690	310
	547				146	284					622	266					820	278					476	235					480	308					730	278					700	280					225	310
	548				811	284					838	267					905	276					870	235					511	308					811	278					727	280					583	310
	549				1020	284					191	268					1026	276					285	236					531	308					968	278					572	281					340	312
	550				1028	283					368	268					441	276					194	237					537	308					290	279					971	281					531	311
	551				216	286					992	268					514	276					309	236					850	308					706	279					999	281					556	312
	552				939	287					516	268					871	276					460	237					167	308					920	279					821	282					982	312
	553				243	286					607	269					912	277					648	237					318	310					1077	279					1071	282					578	312
	554				639	287					617	269					965	276					513	238					504	310					1110	279					94	284					638	313
	555				710	287					956	268					227	278					788	238					746	311					104	280					992	283					736	313
	556				819	287					178	270					361	277					954	238					752	310					268	279					380	284					268	314
	557				846	287					309	270					506	278					173	239					784	311					724	280					757	285					323	314
	558				911	287					673	269					741	278					835	238					985	310					168	281					114	286					504	314
	559				224	288					679	270					832	278					985	239					576	313					494	282					534	286					427	314
	560				764	288					876	270					280	279					1045	240					818	312					530	281					848	287					918	315
	561				1038	287					944	270					637	278					1060	240					274	316					300	282					1084	287					949	314
	562				1080	288					117	272					748	279					559	241					414	315					351	282					204	288					1126	314
	563				973	289					440	270					388	280					884	241					218	316					848	282					324	288					876	316
	564				390	290					504	270					865	280					1026	241					224	316					414	282					630	288					167	317
	565				757	290					629	270					908	280					1070	241					760	316					782	283					702	289					347	317
	566				361	291					898	271					314	280					244	242					1044	316					976	283					96	291					404	317
	567				561	290					908	270					458	281					595	242					146	318					275	284					194	290					528	317
	568				979	291					359	272					896	280					221	242					161	318					732	285					116	293					696	316
	569				373	292					406	271					972	281					713	243					1133	318					323	286					1094	293					705	316
	570				830	292					594	272					1030	280					1016	242					642	319					266	287					404	294					199	318
	571				928	292					928	271					630	282					300	244					823	318					488	287					1036	294					414	318
	572				101	293					149	272					762	282					323	244					90	320					560	287					480	296					1098	318
	573				350	293					254	273					934	283					480	244					123	320					709	286					582	295					592	319
	574				382	293					830	273					526	284					678	244					319	320					100	288					1080	295					719	318
	575				174	294					1026	273					592	285					686	244					606	320					374	288					336	297					580	320
	576				206	294					1052	272					656	284					832	244					652	323					418	288					426	296					1045	320
	577				278	294					504	277					300	285					998	244					156	325					592	288					465	296					324	321
	578				768	294					127	276					336	284					139	245					216	325					125	290					549	295					466	320
	579				824	294					579	276					908	287					498	245					224	325					802	290					183	296					210	321
	580				472	295					1040	276					836	287					752	246					232	325					274	292					628	297					257	322
	581				964	295					607	277					386	288					808	244					670	324					310	292					641	298					808	323
	582				1044	294					670	276					401	288					1010	245					681	324					481	292					869	299					917	322
	583				198	296					971	277					563	288					168	246					689	324					554	292					938	299					929	322
	584				243	296					470	278					584	288					514	247					833	325					582	292					446	300					987	323
	585				400	296					686	277					745	288					529	246					134	326					1016	292					843	301					500	324
	586				854	296					808	277					863	288					642	247					589	326					246	293					662	301					552	323
	587				1083	296					1071	278					484	289					464	248					491	327					437	293					857	302					720	324
	588				749	297					839	279					492	289					158	249					1063	327					910	293					897	302					841	324
	589				845	296					117	280					554	288					343	248					201	328					506	294					222	303					431	324
	590				1000	297					494	280					722	288					597	248					368	328					637	294					491	303					524	324
	591				1090	296					775	279					651	290					848	249					376	328					838	294					254	304					953	325
	592				887	298					799	280					1018	290					977	248					531	328					152	295					409	304					1139	325
	593				1051	298					123	281					1052	290					338	250					665	328					228	295					837	304					152	326
	594				1128	298					359	280					371	292					386	250					161	328					384	295					958	304					367	326
	595				554	299					661	280					453	291					854	250					184	329					538	295					996	304					900	326
	596				936	299					976	280					588	291					194	251					978	329					394	296					83	305					1094	327
	597				174	300					368	282					656	291					212	251					462	330					562	296					522	305					423	327
	598				540	300					199	282					715	290					226	251					98	331					126	297					94	306					448	328
	599				866	300					768	282					994	290					240	251					406	331					487	296					650	306					966	328
	600				896	300					895	282					1108	291					362	251					720	331					433	297					1033	306					812	329
	601				980	300					321	284					434	292					490	250					380	332					482	298					610	307					1023	329
	602				102	300					678	284					680	292					327	251					94	335					510	299					117	307					1080	328
	603				291	300					121	285					938	293					1008	252					438	334					623	298					741	308					232	330
	604				643	300					213	284					966	293					255	253					620	335					1064	299					215	310					490	330
	605				336	302					502	285					250	294					270	253					215	336					581	300					646	310					781	329
	606				652	302					792	286					346	294					351	253					270	336					1048	300					841	310					180	330
	607				142	304					807	286					796	294					411	253					614	336					280	301					100	311					580	331
	608				218	304					1023	286					848	294					645	253					326	337					385	300					299	312					750	331
	609				249	304					692	286					932	294					474	254					689	336					673	300					900	311					416	332
	610				405	304					704	286					281	294					481	254					1024	338					862	301					1070	311					462	332
	611				485	304					1080	286					312	294					536	254					181	340					153	302					1098	311					909	332
	612				1052	304					353	288					634	295					676	254					188	340					469	302					795	312					928	332
	613				1120	304					398	287					740	294					141	255					220	340					838	301					820	312					644	332
	614				1126	304					417	287					402	296					1082	255					625	340					561	302					1054	312					806	333
	615				1005	305					1019	289					656	296					199	256					862	340					899	303					468	314					1101	332
	616				267	306					235	290					981	296					560	256					1145	339					910	303					528	314					161	334
	617				469	306					744	290					338	296					751	255					894	342					192	304					725	313					241	334
	618				984	306					751	290					376	297					806	256					1001	342					302	304					1023	313					530	334
	619				84	307					359	290					521	298					713	257					276	343					715	304					162	314					566	334
	620				180	307					492	290					543	298					1032	256					326	343					825	304					196	313					575	334
	621				519	306					510	290					892	296					314	258					332	343					174	305					372	314					426	335
	622				298	308					630	290					562	299					447	258					788	343					345	305					650	313					592	336
	623				645	308					998	291					754	299					588	258					581	344					422	305					890	314					714	336
	624				188	309					809	292					908	300					736	258					698	344					455	305					612	315					953	336
	625				235	308					862	292					99	300					968	258					1109	344					488	306					124	316					1112	336
	626				449	309					144	292					114	300					976	258					317	345					508	306					737	316					1055	338
	627				939	309					272	292					843	300					272	258					469	345					616	306					168	317					304	339
	628				1112	309					351	292					487	300					348	259					88	346					724	306					552	317					562	339
	629				493	309					686	293					814	302					367	258					498	346					932	306					720	317					664	339
	630				156	311					818	292					134	302					382	258					411	347					558	307					1061	316					862	339
	631				355	310					1101	292					141	302					431	258					876	347					952	307					246	318					1018	339
	632				607	311					158	294					154	302					579	259					83	348					1007	307					282	318					1031	340
	633				773	310					299	294					166	302					933	260					290	348					1064	306					352	318					1121	340
	634				104	312					390	294					274	302					1002	260					418	348					122	308					473	319					277	340
	635				307	312					402	293					312	302					1073	258					474	348					778	308					210	318					446	341
	636				880	312					524	294					358	304					388	260					970	348					409	308					436	321					792	340
	637				1080	312					719	294					690	302					442	261					1006	348					259	310					726	321					244	341
	638				769	313					785	294					1046	301					467	261					202	348					297	310					514	322					483	342
	639				804	313					838	294					90	303					481	262					379	349					915	309					537	323					1040	342
	640				824	313					1010	294					428	302					987	262					355	350					970	310					1014	323					567	342
	641				853	312					290	295					718	304					1080	262					390	350					276	310					1044	323					132	344
	642				1119	313					502	294					887	304					512	263					487	350					282	311					72	324					590	344
	643				189	314					738	295					227	304					646	263					482	351					554	311					108	324					704	344
	644				467	314					188	295					242	304					673	262					297	352					266	312					526	324					902	345
	645				128	314					232	296					971	305					682	263					628	352					476	312					764	323					678	346
	646				459	315					418	296					263	306					687	263					59	353					1108	312					1101	324					463	346
	647				451	316					635	296					328	306					944	264					494	353					1131	312					1122	324					762	347
	648				747	317					214	299					370	306					1087	264					676	353					436	313					240	325					1138	348
	649				782	316					542	296					756	306					283	264					885	353					88	314					286	326					426	349
	650				901	316					692	296					980	306					406	264					998	352					928	314					420	325					697	348
	651				699	317					829	297					384	307					435	264					1074	352					118	315					483	326					71	349
	652				920	316					1056	296					439	308					622	265					554	354					143	314					96	326					108	350
	653				1080	317					236	298					800	306					334	266					564	354					198	315					198	326					321	350
	654				600	318					1002	298					1005	306					542	266					785	354					250	315					376	326					174	351
	655				422	319					259	298					259	308					733	265					500	355					325	316					747	327					300	350
	656				570	319					623	299					446	308					748	265					669	355					410	315					1090	326					367	350
	657				694	319					714	299					724	308					108	267					754	354					422	315					208	327					936	351
	658				706	318					990	298					729	308					150	267					1037	355					671	315					249	327					978	350
	659				74	320					244	300					1103	309					698	266					1133	355					907	316					546	327					231	352
	660				85	320					1046	300					912	309					561	268					304	357					348	318					882	327					242	352
	661				150	320					1080	300					521	310					753	268					888	357					567	320					322	328					624	352
	662				623	320					193	300					963	310					816	267					1068	357					1093	318					491	328					283	352
	663				684	320					411	300					1135	310					1109	268					386	358					101	319					730	328					535	352
	664				812	319					770	301					298	312					213	269					358	360					156	319					707	329					834	353
	665				833	319					1104	301					376	312					345	269					396	360					608	320					557	330					964	353
	666				964	320					1113	301					558	312					1067	269					803	359					656	320					720	330					972	353
	667				131	321					102	301					690	312					128	270					1013	360					192	321					987	330					1025	353
	668				676	321					153	302					744	312					450	270					211	361					686	321					533	330					1093	353
	669				792	321					391	302					992	312					595	270					966	360					148	322					755	331					292	354
	670				879	321					862	302					326	313					315	271					408	362					772	322					1120	331					496	354
	671				98	322					896	302					706	312					530	271					657	362					905	322					158	332					505	354
	672				137	321					1094	302					803	312					610	271					784	362					1115	322					876	332					84	355
	673				354	322					123	302					216	314					293	272					693	363					212	322					204	333					341	355
	674				937	322					286	302					390	315					432	271					858	363					283	323					290	332					378	355
	675				158	323					374	303					432	314					489	272					582	364					438	324					400	334					631	354
	676				195	322					539	302					792	314					498	272					1025	364					461	324					481	334					745	356
	677				241	323					628	303					924	314					572	272					67	364					470	324					785	333					792	356
	678				830	323					1028	303					946	314					738	271					178	366					825	325					1060	333					858	356
	679				448	324					163	304					1049	314					1002	272					327	366					190	326					306	334					987	356
	680				540	324					343	305					974	314					632	273					416	366					652	326					606	334					106	357
	681				893	324					610	304					1056	315					1031	272					874	366					244	327					699	333					458	357
	682				412	325					710	304					78	315					442	274					389	366					287	327					797	334					768	358
	683				637	324					136	305					414	316					604	274					432	366					380	328					852	334					114	359
	684				738	325					188	304					772	316					746	274					885	368					400	327					996	334					816	359
	685				884	325					490	304					782	316					833	274					160	368					880	327					1022	334					894	358
	686				298	326					586	304					882	316					923	274					476	368					990	327					822	335					345	360
	687				378	326					622	305					930	316					937	274					517	368					90	328					79	335					453	359
	688				614	326					752	305					1097	316					210	275					824	368					407	328					546	336					731	360
	689				905	326					980	305					202	316					757	275					431	371					680	327					596	336					434	361
	690				996	326					114	305					106	318					262	276					860	371					769	328					737	336					314	362
	691				1137	326					641	306					136	318					364	276					1032	371					425	328					790	336					341	362
	692				207	326					851	306					428	318					647	275					503	372					217	330					1066	336					727	362
	693				644	327					652	307					632	318					271	276					206	374					778	330					1073	336					787	362
	694				745	326					331	308					656	318					285	277					481	374					866	330					147	337					1103	362
	695				758	327					418	308					167	318					432	277					789	374					1091	330					286	337					794	363
	696				1029	327					528	308					177	319					776	276					900	374					123	331					407	337					953	363
	697				566	328					695	308					1131	319					825	276					530	374					210	330					1042	337					526	364
	698				767	328					764	308					208	319					850	277					223	376					449	331					1094	337					619	364
	699				802	328					856	307					346	320					192	278					1126	376					516	331					1145	337					918	364
	700				868	329					989	307					380	320					561	277					58	377					586	331					91	337					986	364
	701				900	330					195	308					687	320					637	278					166	377					688	330					300	338					1091	364
	702				918	330					391	308					340	320					880	278					236	378					1018	331					845	338					210	365
	703				1072	330					485	309					394	320					740	279					247	378					322	332					900	338					492	365
	704				780	331					749	310					940	320					857	279					470	378					444	332					334	340					256	366
	705				944	331					804	310					662	322					1030	279					84	379					106	333					361	340					994	366
	706				952	331					1084	310					832	322					311	280					106	379					146	332					560	339					276	367
	707				301	332					177	310					721	323					706	280					157	380					154	333					632	340					288	366
	708				332	332					250	310					786	324					875	280					588	380					306	334					696	340					372	367
	709				412	332					444	310					327	324					150	280					435	381					372	332					640	341					429	366
	710				887	332					797	310					727	324					846	281					527	381					784	333					927	341					443	367
	711				937	332					870	311					524	325					962	281					741	381					792	333					966	341					480	367
	712				570	333					880	311					630	324					553	282					276	382					286	334					606	342					666	367
	713				1140	332					234	312					960	324					1102	282					325	382					576	333					750	342					752	367
	714				138	334					705	311					1006	324					667	283					391	382					608	334					914	342					680	368
	715				382	333					162	312					653	326					769	283					632	381					679	334					92	343					1068	368
	716				350	335					204	312					776	326					831	283					286	383					843	335					226	343					408	369
	717				1005	334					306	313					823	326					1035	282					617	383					1002	336					932	343					606	369
	718				1062	335					502	312					1120	326					96	284					886	383					90	336					1060	343					932	368
	719				703	336					711	313					544	327					374	284					848	384					266	336					697	344					1151	368
	720				772	335					820	313					469	328					1042	284					1163	384					404	336					702	344					365	371
	721				1034	336					858	312					364	330					116	285					202	385					490	336					808	344					686	370
	722				342	337					944	313					475	330					138	286					407	384					768	336					889	344					804	371
	723				678	337					964	313					996	330					230	286					1044	385					995	336					906	345					625	372
	724				692	336					1130	313					1041	330					320	286					501	386					124	336					348	346					864	372
	725				725	337					875	314					458	330					733	286					991	385					387	337					601	346					1106	372
	726				925	336					982	314					524	331					1027	286					166	386					944	338					1014	346					752	373
	727				217	338					75	315					705	332					123	287					439	386					1102	337					1070	346					1084	373
	728				918	338					310	315					73	333					392	287					1098	387					984	338					338	346					191	374
	729				147	339					332	315					298	334					582	287					452	388					523	338					621	347					924	374
	730				893	339					373	314					1004	334					850	286					462	388					687	338					798	347					1050	374
	731				955	339					1033	315					436	335					303	288					468	388					326	339					878	348					1165	374
	732				712	340					141	316					473	334					690	288					60	389					245	340					555	349					278	375
	733				950	340					578	315					1059	335					198	289					728	389					578	341					605	349					832	375
	734				986	340					649	316					696	336					309	289					396	391					626	341					616	350					512	376
	735				1083	340					789	315					871	336					487	289					886	391					897	341					944	348					67	376
	736				469	340					868	316					77	336					765	289					957	390					1141	341					1036	349					778	377
	737				422	342					1000	316					96	336					267	290					1067	390					564	342					102	349					368	378
	738				788	341					1054	315					210	337					424	290					1081	390					1036	342					302	350					973	378
	739				1053	342					85	317					364	336					221	291					209	392					428	344					1004	350					410	379
	740				1069	342					248	316					193	338					285	290					280	392					822	343					1041	350					722	378
	741				248	343					515	316					522	338					519	291					738	392					868	343					578	351					786	378
	742				256	342					574	316					182	338					650	291					788	392					937	343					72	351					806	378
	743				266	343					390	318					581	338					671	291					416	393					308	344					133	353					838	379
	744				868	343					778	318					710	338					706	291					424	393					1074	344					231	352					285	380
	745				1039	342					802	318					864	340					808	291					1091	394					1130	344					454	352					1139	380
	746				1140	343					809	318					86	340					936	291					608	395					1043	345					836	352					261	381
	747				1148	343					838	318					299	340					952	291					947	394					66	346					846	352					450	381
	748				924	343					964	318					478	340					1054	290					992	395					637	346					1093	352					500	381
	749				93	344					876	318					356	341					1103	290					392	396					266	346					508	353					850	382
	750				147	345					351	321					428	340					847	292					587	396					342	348					750	354					488	382
	751				994	345					407	321					647	340					372	293					658	396					995	346					882	354					511	384
	752				1012	345					1096	320					659	340					393	293					130	397					83	348					281	355					540	384
	753				159	345					1139	320					766	340					916	293					542	396					243	347					66	357					825	384
	754				578	346					118	322					794	342					1014	292					738	397					275	348					456	358					985	384
	755				734	346					444	320					90	342					99	294					449	398					708	348					1002	357					309	384
	756				904	346					526	321					855	342					384	294					321	399					792	348					234	358					554	385
	757				584	347					612	321					74	343					491	294					345	399					91	349					338	358					720	384
	758				648	348					699	320					160	343					498	294					719	398					410	348					728	358					799	385
	759				369	348					940	320					264	343					875	294					147	400					525	348					562	361					1027	384
	760				523	349					991	320					530	344					970	294					1038	400					803	349					637	359					336	386
	761				676	348					1035	321					588	342					1001	294					178	401					1003	349					144	360					705	385
	762				694	350					561	322					811	343					437	295					262	401					328	350					58	361					283	387
	763				686	350					578	322					816	343					275	296					604	401					863	349					1058	361					292	387
	764				998	351					762	322					883	344					304	296					170	402					136	350					205	362					438	387
	765				1150	350					958	322					990	342					317	296					424	402					625	350					346	362					693	387
	766				82	351					1028	322					1118	342					527	296					725	402					314	354					162	363					869	386
	767				535	352					226	323					146	344					590	296					774	403					993	353					666	362					166	388
	768				870	352					235	323					253	344					674	296					829	402					150	354					226	364					914	388
	769				970	352					724	323					440	344					732	296					945	403					636	354					1124	365					934	388
	770				1086	352					1052	323					502	344					1110	296					40	404					901	354					602	366					603	388
	771				426	353					86	324					573	344					283	297					130	404					65	355					878	366					346	389
	772				578	352					430	324					836	344					334	298					317	404					279	355					962	366					650	390
	773				291	353					832	325					671	344					426	298					693	404					427	354					784	367					671	390
	774				326	354					450	325					830	345					598	297					1176	404					1045	355					322	367					1121	390
	775				371	353					468	326					1110	344					685	299					257	404					340	356					941	368					322	391
	776				643	353					529	325					1150	344					744	298					334	404					390	356					116	369					991	390
	777				786	354					596	326					424	346					826	298					1032	406					751	356					492	370					238	392
	778				125	355					670	326					719	346					254	299					49	407					241	357					796	369					748	392
	779				169	355					376	326					734	346					565	298					220	406					473	358					1059	369					303	393
	780				250	355					777	327					892	346					779	299					168	408					533	358					1076	369					534	393
	781				382	355					248	328					964	346					220	300					536	408					654	358					1098	370					1095	395
	782				414	355					701	328					1028	346					351	300					1102	408					707	358					186	371					1148	393
	783				660	356					1022	328					176	346					478	300					1167	408					102	359					223	371					543	393
	784				747	356					1043	327					1082	346					586	300					64	409					193	358					302	371					685	394
	785				148	357					1132	327					600	348					1067	300					230	409					283	359					974	371					438	394
	786				368	356					203	329					780	348					1007	301					528	408					590	361					200	372					274	396
	787				705	357					233	330					221	348					1120	301					196	410					346	362					326	372					552	396
	788				1105	357					240	328					1148	349					98	301					396	410					443	362					1087	372					593	396
	789				1113	357					356	329					321	350					580	302					575	410					1114	363					506	373					935	396
	790				158	358					405	329					816	350					636	302					774	410					149	364					542	373					1035	396
	791				1066	358					686	329					984	350					648	303					260	411					160	364					732	372					164	397
	792				108	359					804	329					193	350					835	303					1024	411					182	364					780	374					170	398
	793				717	359					125	330					256	351					1050	303					979	412					364	364					1002	374					916	398
	794				800	359					311	330					334	350					1059	303					711	413					970	364					1046	374					965	398
	795				292	360					517	331					766	351					279	304					726	412					1063	364					490	376					1152	398
	796				423	359					706	330					160	352					385	304					961	412					315	364					646	375					374	400
	797				574	360					926	330					360	352					408	303					112	414					535	365					804	374					904	400
	798				98	361					441	331					515	352					458	304					253	414					578	365					938	375					1068	400
	799				726	361					625	331					710	352					926	304					314	414					821	364					86	376					1140	400
	800				610	362					849	330					861	352					126	305					392	414					845	365					826	376					130	401
	801				788	362					528	332					883	352					1078	305					484	414					1162	368					948	376					320	401
	802				910	363					616	331					73	352					398	305					683	414					87	366					1154	376					756	401
	803				210	364					720	332					299	352					914	306					350	415					206	366					411	377					52	402
	804				326	364					1098	333					448	353					1102	306					1116	415					336	366					770	377					518	402
	805				730	364					87	333					963	353					98	307					267	417					158	368					1060	377					1058	402
	806				822	364					716	333					228	354					207	306					320	417					368	368					1080	377					159	402
	807				1060	364					778	333					90	354					320	307					963	416					484	368					383	378					214	403
	808				1071	364					834	332					136	354					1012	307					1033	416					590	368					762	378					773	402
	809				447	365					1018	332					506	355					1097	306					1042	416					1046	368					782	378					892	403
	810				1110	365					891	336					536	355					178	308					296	418					1060	369					258	380					185	403
	811				796	366					1003	333					903	355					250	308					617	418					1083	368					911	378					274	404
	812				812	366					428	335					690	356					830	308					1050	419					151	370					264	380					538	404
	813				294	367					732	334					1022	356					111	308					88	420					198	370					304	380					552	404
	814				430	367					830	335					58	356					133	308					109	420					286	370					466	380					570	403
	815				164	368					206	336					562	357					243	309					344	420					528	370					702	380					669	405
	816				580	368					376	336					723	357					328	309					123	421					562	370					447	381					968	407
	817				782	368					702	336					108	358					357	309					290	421					793	370					1048	381					167	408
	818				552	369					806	336					120	358					727	309					597	421					1033	370					526	382					767	408
	819				312	370					956	336					242	358					822	309					1027	420					1113	369					565	382					832	408
	820				440	370					73	337					955	358					934	309					412	422					659	371					712	381					864	408
	821				452	370					360	337					100	358					142	309					464	422					805	371					953	382					572	408
	822				1052	370					714	338					424	358					577	310					670	422					1134	371					1159	382					675	409
	823				1091	369					925	338					680	358					1134	310					112	424					103	372					673	383					842	408
	824				184	371					145	338					838	358					316	310					167	424					113	372					693	382					889	409
	825				642	371					287	338					908	358					589	312					528	425					128	372					1070	383					220	410
	826				1080	371					439	340					446	360					604	311					804	425					398	372					124	384					809	410
	827				103	372					472	338					652	360					610	310					1004	425					437	373					229	384					1125	410
	828				248	372					521	338					1080	360					634	311					577	426					485	375					284	384					146	410
	829				1002	372					620	338					1144	360					743	310					1044	427					714	373					224	385					334	411
	830				76	373					1090	339					258	361					1001	311					84	428					733	374					1031	385					639	411
	831				870	372					159	340					299	360					183	312					277	428					1007	374					1080	386					691	410
	832				136	374					192	340					398	360					274	312					1123	428					457	374					1098	386					1147	412
	833				720	375					405	340					450	360					960	312					400	429					576	375					88	386					431	413
	834				983	374					515	340					470	360					1046	312					464	429					674	375					316	387					719	412
	835				348	376					800	340					514	361					499	313					567	430					599	377					676	387					170	414
	836				170	377					1076	340					536	360					625	313					33	431					192	377					78	387					266	415
	837				635	376					326	341					693	361					446	314					974	431					401	377					236	388					571	416
	838				728	377					1015	340					704	360					804	314					694	432					810	377					366	388					601	416
	839				827	377					63	343					283	362					864	313					1117	433					219	378					1041	388					1022	416
	840				516	378					86	342					463	362					912	314					414	433					338	378					53	388					1038	416
	841				585	378					220	342					490	362					1026	314					898	433					516	378					183	389					1108	416
	842				623	378					300	342					525	363					654	315					981	432					928	378					470	389					42	417
	843				1099	379					826	342					579	362					209	316					174	434					158	379					732	389					228	417
	844				1154	379					830	342					644	362					385	316					671	434					424	378					1129	388					584	417
	845				157	380					337	343					896	363					394	316					1002	434					712	378					223	390					1179	416
	846				381	380					364	344					161	364					597	316					60	435					550	380					404	390					519	418
	847				1055	380					376	342					220	364					822	316					444	435					1085	380					878	390					824	418
	848				406	380					386	342					726	364					1006	316					25	436					1113	380					967	390					939	418
	849				374	382					564	342					348	364					1016	316					494	436					301	382					1018	390					973	418
	850				838	382					1021	343					634	366					78	317					617	435					416	382					778	392					258	419
	851				845	381					145	344					202	366					87	317					756	436					732	382					926	393					463	418
	852				84	383					812	344					423	366					373	317					596	437					165	383					713	392					902	418
	853				92	383					880	344					520	366					521	316					134	438					422	382					1152	392					551	420
	854				384	383					990	344					418	367					528	317					205	438					1002	384					65	393					246	421
	855				568	383					1030	344					1080	368					1097	317					471	438					1105	383					148	392					947	421
	856				861	382					1055	344					86	368					242	318					725	438					572	383					282	394					149	422
	857				186	384					540	345					548	368					536	318					864	438					668	384					378	393					174	422
	858				193	384					732	344					652	369					622	318					985	438					711	384					133	393					334	422
	859				450	384					78	346					732	370					796	318					528	439					189	385					351	394					660	422
	860				876	384					200	346					746	370					107	319					690	439					484	385					462	394					672	422
	861				954	384					289	347					799	370					258	319					826	439					502	384					1079	394					510	422
	862				1103	384					425	346					845	370					474	319					34	440					698	385					1089	394					680	422
	863				461	385					489	346					932	370					935	319					141	440					125	386					299	395					716	422
	864				721	385					601	345					1023	370					1038	319					422	440					229	386					325	395					1003	422
	865				516	386					520	346					352	371					224	320					565	440					88	387					1045	394					370	424
	866				714	386					125	348					489	370					1112	320					832	439					133	387					96	396					847	424
	867				1026	386					309	347					402	372					115	321					945	440					450	387					590	396					211	425
	868				1062	386					318	348					1164	372					129	321					1093	441					576	388					850	396					71	426
	869				264	387					472	348					88	373					512	321					278	441					703	389					154	397					550	426
	870				378	387					816	347					302	373					819	320					432	441					731	388					164	397					639	426
	871				560	387					323	348					229	374					982	321					575	441					1030	389					391	397					778	426
	872				247	388					333	349					594	374					425	322					84	443					148	390					538	397					929	427
	873				347	388					652	349					544	374					596	322					98	442					256	390					626	397					426	428
	874				384	388					710	349					626	375					1060	322					109	442					314	390					780	397					663	428
	875				848	388					884	350					660	376					88	323					223	443					938	390					1157	397					920	428
	876				230	388					1152	348					282	376					246	324					492	443					399	391					338	398					254	429
	877				586	388					386	350					606	376					318	324					488	444					791	391					634	398					902	429
	878				120	390					801	350					612	377					325	324					808	444					303	391					302	399					132	430
	879				405	389					1070	350					740	377					417	324					836	444					357	392					1031	399					555	430
	880				856	390					418	350					850	376					483	323					1124	444					490	392					932	401					990	430
	881				1076	390					667	351					929	376					1092	324					350	445					496	392					1132	400					333	431
	882				929	391					737	350					1036	378					436	325					360	445					697	392					648	401					382	431
	883				275	392					841	351					54	378					629	325					579	444					828	392					663	402					707	430
	884				366	392					1018	351					340	378					811	325					1067	445					1154	392					695	401					714	431
	885				521	392					1110	350					470	378					854	325					596	446					109	393					758	401					867	431
	886				619	392					69	351					594	378					950	325					660	447					225	393					1143	400					959	430
	887				81	393					103	352					811	378					172	326					922	447					879	393					364	402					1027	430
	888				130	392					239	352					1094	377					228	325					724	448					1089	393					457	402					574	432
	889				394	393					300	352					198	379					334	326					869	448					580	394					866	402					657	432
	890				440	394					368	352					960	379					674	326					950	448					1112	394					245	404					479	432
	891				92	395					464	352					384	380					785	326					985	448					42	394					348	403					790	433
	892				319	394					754	352					392	380					1140	326					227	448					148	395					779	404					861	434
	893				896	395					924	351					632	380					516	327					672	449					506	395					882	404					373	435
	894				906	395					96	352					802	380					312	328					736	449					1142	396					46	404					991	435
	895				1006	394					165	352					950	380					687	328					153	450					68	396					155	405					1017	435
	896				1167	394					206	353					227	380					920	328					432	450					740	396					464	405					78	436
	897				657	396					312	354					761	380					744	328					791	450					815	396					922	405					499	437
	898				974	396					490	352					435	382					774	329					1116	450					434	398					976	405					775	436
	899				981	396					1010	353					442	382					109	330					55	451					442	396					65	406					343	438
	900				1024	396					1145	353					578	381					548	330					132	451					645	397					334	406					408	438
	901				436	397					362	354					752	382					591	330					300	451					990	397					414	406					484	438
	902				485	396					762	354					740	383					666	330					50	452					59	398					930	406					1042	438
	903				504	397					804	354					862	383					1086	330					634	453					399	398					1081	406					93	438
	904				602	397					293	355					1086	382					171	331					814	452					870	398					1178	406					401	438
	905				784	397					649	354					1133	383					406	331					995	452					117	398					226	407					689	439
	906				217	397					380	355					288	384					556	331					973	453					828	398					850	407					850	438
	907				318	399					596	357					468	384					738	331					613	454					914	398					1129	408					1133	438
	908				333	399					938	356					498	384					1037	331					1035	453					558	400					1160	408					303	440
	909				366	398					321	357					612	384					682	332					1070	454					878	400					115	408					529	440
	910				756	399					660	357					616	384					855	333					23	454					46	401					1169	409					572	440
	911				776	399					736	357					626	384					182	333					233	454					632	401					1035	410					1121	440
	912				944	400					1103	356					1025	384					249	333					263	454					782	401					266	412					322	441
	913				693	400					118	358					865	385					334	333					361	454					935	401					802	411					373	441
	914				286	401					172	358					1148	384					675	332					571	455					84	402					986	411					783	440
	915				613	400					655	358					334	386					868	333					133	456					228	402					44	412					214	442
	916				706	401					155	358					272	388					1132	333					178	456					386	402					466	412					563	442
	917				911	400					639	358					356	388					629	334					784	456					463	402					212	413					186	443
	918				1012	400					793	359					870	388					714	334					736	456					700	402					822	413					248	443
	919				658	402					922	359					1075	387					766	334					773	457					1008	402					230	414					259	443
	920				732	402					930	359					292	389					1082	334					161	458					1146	402					283	414					500	444
	921				747	402					995	359					806	389					1096	334					826	458					687	402					924	414					641	444
	922				952	402					1131	358					396	390					117	336					964	458					101	404					342	415					694	444
	923				78	403					72	360					679	390					171	336					262	459					181	403					376	415					1068	444
	924				918	403					295	361					758	390					464	335					1096	458					416	404					648	415					340	446
	925				376	404					335	359					832	390					510	337					730	460					756	404					1006	415					419	446
	926				703	404					407	360					924	390					556	336					1169	460					62	404					292	416					774	446
	927				754	404					822	360					1082	390					1017	336					237	461					260	405					145	416					430	447
	928				960	404					1092	360					67	390					64	338					644	461					320	405					266	417					600	447
	929				61	405					108	360					409	390					586	338					890	461					373	406					379	418					261	448
	930				520	404					490	360					508	390					602	338					950	461					512	405					397	418					518	448
	931				592	405					832	360					658	390					687	338					1000	461					1083	405					258	419					86	449
	932				686	405					939	361					751	391					754	338					52	462					147	406					386	420					95	448
	933				715	405					359	362					767	390					798	339					95	462					289	406					526	420					504	449
	934				972	406					417	361					860	390					898	338					163	462					625	406					566	419					553	448
	935				1027	406					543	362					132	392					218	341					326	463					930	406					699	421					354	450
	936				787	407					623	361					164	392					267	341					101	464					914	407					888	420					122	451
	937				799	406					843	361					238	392					347	340					1183	465					1174	408					897	420					157	451
	938				1010	406					883	362					320	392					1007	341					354	466					341	408					1071	420					166	451
	939				207	408					397	362					700	392					210	342					489	466					666	408					69	421					511	450
	940				237	408					693	362					782	392					255	342					755	466					332	408					354	421					866	452
	941				618	408					866	363					88	392					318	342					114	467					698	409					850	421					485	452
	942				924	408					382	364					250	392					357	342					209	468					866	408					926	422					798	453
	943				1038	408					477	364					257	392					1061	342					246	468					442	410					998	422					699	454
	944				1051	408					773	364					1010	392					233	343					281	468					532	410					85	423					1015	455
	945				754	409					800	364					337	394					910	343					972	468					143	411					622	424					1034	454
	946				965	408					1066	364					479	394					994	343					270	469					890	410					933	423					139	456
	947				165	410					1042	365					568	394					1085	342					300	469					925	412					1138	422					336	456
	948				590	410					1048	365					722	394					630	344					338	469					964	411					242	424					745	456
	949				1170	409					1131	365					828	394					646	344					510	469					34	412					255	424					257	456
	950				409	411					62	365					1106	394					750	344					126	470					82	412					1183	424					491	456
	951				856	410					125	366					174	394					188	345					262	470					230	412					318	425					1127	457
	952				61	412					79	368					529	394					284	345					364	470					382	412					805	425					680	458
	953				175	412					237	368					864	395					308	345					832	470					412	412					878	425					843	458
	954				455	412					243	367					1125	396					550	345					1172	470					670	412					121	425					1088	458
	955				1095	412					732	367					62	396					607	345					184	471					713	412					285	428					647	459
	956				121	413					873	367					221	396					762	344					494	471					1052	412					394	426					340	460
	957				1102	413					945	366					502	396					1146	344					818	470					63	412					500	426					1031	460
	958				132	414					150	369					732	396					292	347					1004	471					689	413					950	426					752	461
	959				352	414					625	369					857	396					465	347					346	472					298	414					354	427					1070	460
	960				399	414					799	369					713	397					570	347					248	473					625	414					642	427					588	462
	961				659	413					854	369					1002	396					669	346					296	473					795	414					750	427					716	462
	962				840	414					862	369					102	398					364	348					426	473					56	415					839	427					113	462
	963				142	414					359	371					278	398					411	348					744	474					570	415					178	428					240	463
	964				1022	414					558	370					680	398					640	348					476	475					983	416					901	428					245	463
	965				77	416					990	370					706	398					682	348					909	474					1085	415					141	429					330	463
	966				667	416					108	371					1021	398					788	348					222	476					334	416					184	429					364	462
	967				1059	416					143	371					577	398					810	348					24	477					142	418					552	429					52	464
	968				361	416					810	371					812	398					992	348					27	477					528	418					605	429					430	464
	969				456	417					300	372					116	400					82	349					1097	476					1048	418					1071	428					704	464
	970				68	418					398	372					266	400					343	349					670	478					254	420					332	430					1021	465
	971				462	418					685	372					321	400					354	348					989	478					298	420					410	430					1058	465
	972				790	418					736	373					346	400					704	349					320	480					445	420					476	430					131	466
	973				352	419					764	372					440	400					780	349					367	481					892	419					708	430					778	466
	974				855	419					972	372					464	400					1102	349					519	480					760	421					764	430					909	466
	975				254	420					217	375					729	400					178	350					1026	481					796	421					92	431					1187	466
	976				286	420					385	373					745	400					511	350					398	482					1032	421					323	431					518	466
	977				479	420					390	373					1078	399					536	350					474	482					1074	422					1142	431					656	466
	978				891	420					415	372					646	401					112	351					699	482					1094	422					936	432					110	468
	979				397	420					69	374					800	400					576	351					715	482					1114	422					106	433					296	468
	980				921	421					173	374					922	400					1139	350					908	481					379	422					189	433					861	468
	981				941	422					481	374					948	401					370	352					744	483					630	422					684	434					976	468
	982				358	423					620	374					544	402					816	351					901	483					837	423					806	433					350	469
	983				620	423					754	374					692	402					863	352					138	484					277	424					556	434					542	469
	984				693	422					1008	374					778	402					228	353					427	484					1146	425					842	434					949	469
	985				926	423					1085	374					792	402					1132	353					792	484					73	426					42	435					330	470
	986				181	424					1145	374					866	403					83	354					105	484					339	425					206	435					666	470
	987				380	424					554	375					970	403					960	354					582	486					570	424					474	435					718	470
	988				426	424					722	376					432	404					217	355					1088	486					600	424					619	435					305	470
	989				883	424					909	375					244	406					385	355					235	487					645	424					584	436					509	470
	990				367	426					962	374					332	404					620	355					729	487					679	425					614	436					606	471
	991				724	426					1066	374					63	406					925	355					1101	487					776	425					1146	436					114	472
	992				737	426					348	376					708	406					1032	355					332	488					82	425					182	437					389	472
	993				998	426					81	377					726	406					153	356					668	488					510	426					288	437					525	472
	994				1063	426					236	377					738	406					402	356					966	488					516	426					326	437					970	472
	995				404	428					841	376					83	406					410	355					680	489					980	426					402	437					137	473
	996				434	428					856	376					236	408					456	357					839	488					125	426					802	437					424	472
	997				574	428					976	377					341	407					54	358					113	490					141	427					192	438					653	473
	998				799	427					280	378					564	406					560	358					460	490					266	427					446	438					923	473
	999				254	429					246	379					750	406					658	358					1024	490					1104	427					518	438					1047	473
	1000				311	429					306	378					119	408					816	358					804	492					941	428					1110	438					566	474
	1001				389	429					390	378					1164	408					745	359					874	492					98	428					694	440					593	474
	1002				474	429					530	378					59	408					99	360					95	492					1088	430					876	439					824	474
	1003				942	429					591	379					375	408					211	360					696	492					216	431					895	439					434	476
	1004				286	430					602	379					450	409					1051	360					1006	492					480	431					114	440					645	476
	1005				692	430					682	379					1125	408					82	361					1154	494					570	431					862	440					716	476
	1006				731	430					708	379					556	410					182	361					28	495					671	430					1153	440					350	476
	1007				880	429					946	379					746	410					189	360					37	495					83	431					505	441					1064	477
	1008				67	430					1156	379					1143	410					314	361					480	495					322	432					764	441					369	478
	1009				298	431					207	380					476	414					406	361					648	495					642	432					972	441					458	478
	1010				416	431					479	380					990	412					802	361					964	495					691	432					54	442					673	478
	1011				456	430					688	380					1077	413					927	361					143	496					1044	432					618	442					723	478
	1012				488	430					942	381					629	412					1100	360					811	496					1181	432					196	443					321	479
	1013				797	431					66	382					860	412					220	362					347	497					200	434					274	444					547	479
	1014				1127	431					334	381					986	412					436	362					455	496					380	434					439	443					896	478
	1015				58	432					473	382					446	414					493	362					601	497					435	434					546	443					754	480
	1016				372	432					732	382					587	414					1069	362					243	498					621	434					104	444					538	480
	1017				775	432					932	382					682	414					1121	362					1006	498					989	434					967	444					1047	481
	1018				896	432					780	382					756	414					532	362					416	499					1094	434					844	445					78	482
	1019				356	433					899	383					894	414					697	363					472	499					284	435					1076	444					425	482
	1020				956	433					1130	383					438	415					781	363					978	500					318	435					300	446					500	482
	1021				888	434					195	384					1136	414					266	364					110	501					70	436					506	446					1020	482
	1022				148	435					1011	384					88	416					270	364					594	500					412	436					918	446					360	484
	1023				317	434					301	384					1124	416					552	364					1142	501					568	436					1157	446					690	484
	1024				348	435					342	385					302	416					897	364					640	502					131	437					253	447					789	484
	1025				381	436					766	384					554	417					1058	364					519	502					402	437					500	447					344	485
	1026				505	436					806	385					624	418					817	364					747	502					866	438					1180	446					770	485
	1027				54	437					952	385					1111	416					872	365					186	504					1080	438					318	448					1081	485
	1028				249	437					499	387					342	418					126	366					31	505					1122	438					908	448					94	486
	1029				309	437					571	386					850	418					658	366					321	504					268	440					828	449					154	486
	1030				796	437					892	386					32	418					710	366					1156	505					645	438					855	449					353	486
	1031				163	438					1069	386					861	419					135	366					459	506					721	439					1138	449					675	486
	1032				362	438					369	386					888	418					366	367					689	506					164	439					50	450					917	486
	1033				554	438					472	387					124	420					392	367					935	506					1052	441					154	450					22	486
	1034				886	438					794	387					282	421					461	367					1146	506					114	440					873	450					37	486
	1035				140	439					1000	387					708	421					675	367					239	507					218	441					973	450					300	487
	1036				597	439					1090	387					1052	420					740	367					1204	507					320	440					38	452					416	488
	1037				970	439					80	388					1170	420					918	367					590	508					522	443					250	452					741	489
	1038				46	440					534	387					306	422					88	368					912	508					830	443					741	451					754	488
	1039				293	440					812	388					901	422					109	368					364	509					947	443					1002	452					761	488
	1040				622	440					40	389					1084	422					322	369					1076	508					1045	443					1034	452					930	489
	1041				108	441					630	388					1130	422					487	369					1139	509					256	444					500	454					167	490
	1042				129	440					663	388					170	424					644	369					57	510					283	444					978	453					698	490
	1043				318	441					960	389					336	424					994	369					246	511					861	444					610	454					146	491
	1044				534	441					210	390					826	424					406	369					872	510					886	444					732	454					406	490
	1045				604	441					141	391					864	424					174	371					885	509					985	444					746	454					516	491
	1046				719	440					156	391					534	424					226	370					30	511					1180	444					838	454					574	491
	1047				937	441					336	391					978	426					437	371					152	511					27	444					459	456					620	490
	1048				1110	441					712	390					768	426					494	371					763	510					990	446					624	456					822	490
	1049				285	442					970	390					1018	426					522	371					1183	511					1060	446					898	456					938	491
	1050				505	442					50	392					1056	426					531	370					44	512					1001	446					932	456					261	491
	1051				806	442					494	391					93	426					568	371					326	512					58	448					534	457					386	492
	1052				82	444					865	391					652	428					426	372					576	512					92	446					670	457					421	492
	1053				646	444					943	392					696	428					579	372					71	512					162	447					913	457					837	492
	1054				814	444					1131	391					117	430					612	372					306	513					618	447					926	457					238	492
	1055				331	444					90	392					260	429					802	372					377	513					866	447					1164	456					367	493
	1056				493	445					910	394					417	429					306	373					1143	513					68	448					178	458					725	494
	1057				543	444					438	394					110	430					331	373					372	514					411	448					480	458					912	494
	1058				890	445					530	394					272	430					872	373					214	516					656	447					603	458					1029	494
	1059				50	446					572	394					620	430					1052	373					399	516					934	448					148	459					436	494
	1060				90	446					583	393					1170	429					222	374					502	516					402	448					250	459					887	494
	1061				164	446					693	393					241	432					321	374					1064	516					531	449					806	459					1149	494
	1062				664	446					816	394					370	432					670	374					1092	516					589	448					999	458					34	497
	1063				672	446					62	394					1013	433					278	375					369	517					798	448					60	460					628	496
	1064				928	446					473	394					1166	432					561	375					517	516					133	450					272	460					764	497
	1065				1052	446					622	395					29	434					591	374					900	517					255	450					558	460					187	498
	1066				348	447					702	394					39	433					679	375					293	518					1013	450					1031	460					136	498
	1067				826	447					712	395					544	432					729	374					1033	518					1120	450					389	461					283	499
	1068				884	446					719	394					826	433					973	375					81	519					317	452					1021	461					516	498
	1069				942	446					1022	394					903	432					377	376					841	518					1096	450					1178	461					610	498
	1070				950	446					179	396					460	434					507	376					909	519					1166	451					27	462					740	499
	1071				386	448					260	396					160	434					696	376					994	518					43	452					204	461					961	499
	1072				104	448					288	396					536	435					856	376					1009	518					111	452					504	462					405	500
	1073				176	449					596	396					602	435					358	377					243	520					198	452					850	462					706	500
	1074				327	449					956	396					992	434					366	377					426	520					790	452					780	463					999	500
	1075				404	449					1004	396					630	436					383	377					536	520					1034	452					921	463					1048	500
	1076				679	449					1170	395					780	436					995	377					554	520					501	453					293	464					1141	500
	1077				686	449					134	396					972	436					1131	376					850	520					521	453					123	465					156	500
	1078				720	449					192	396					1098	435					91	378					382	521					554	453					1006	465					360	501
	1079				456	450					319	397					690	438					406	377					734	522					888	453					1168	464					591	501
	1080				1092	450					988	396					742	438					722	378					793	522					299	454					150	466					334	502
	1081				59	452					1140	397					751	438					1066	378					950	523					999	454					468	466					439	501
	1082				142	452					566	397					1151	437					1104	378					126	524					282	455					1057	466					485	502
	1083				480	452					856	399					276	439					1151	378					408	524					429	454					254	467					821	502
	1084				918	452					165	400					552	439					80	379					530	524					922	454					670	467					342	503
	1085				1162	451					354	399					619	438					344	379					739	524					982	455					686	467					447	503
	1086				117	452					819	400					889	439					474	379					164	525					1178	456					994	466					528	503
	1087				162	453					196	400					932	439					646	379					324	525					166	456					1001	466					715	503
	1088				1193	453					642	400					1041	440					775	379					644	524					234	456					1185	466					180	504
	1089				127	454					659	401					1057	440					304	380					655	524					364	456					140	468					384	504
	1090				1172	454					809	400					536	440					802	380					692	524					799	456					760	468					401	504
	1091				174	454					1133	401					734	441					1070	380					971	524					134	457					1088	468					583	504
	1092				305	455					70	402					1079	441					488	381					401	526					561	456					914	469					755	504
	1093				494	455					148	402					336	442					639	380					576	527					621	456					258	470					86	505
	1094				891	455					634	403					908	442					1061	381					681	527					774	457					273	470					788	505
	1095				1084	455					278	403					1112	442					135	382					838	526					783	457					602	470					283	506
	1096				70	456					590	403					1142	441					395	382					845	527					42	458					988	470					800	506
	1097				311	456					698	403					124	442					507	382					91	528					82	458					89	472					160	507
	1098				410	456					160	404					317	442					734	382					556	528					198	458					626	472					237	506
	1099				444	456					350	403					836	443					740	382					710	528					988	457					804	471					593	506
	1100				1059	456					389	405					674	444					951	382					764	528					1008	458					954	471					192	508
	1101				715	456					466	404					887	445					331	383					963	528					37	459					1086	471					378	508
	1102				1068	457					653	404					248	446					563	384					1040	528					221	458					1114	471					872	508
	1103				344	458					672	404					453	446					595	384					450	529					303	459					692	472					961	508
	1104				452	458					1166	404					760	446					872	384					894	528					754	458					926	472					1046	508
	1105				628	458					77	405					1040	448					1104	384					826	530					161	459					935	472					260	509
	1106				55	458					172	404					532	448					89	385					1075	530					288	460					593	473					565	508
	1107				724	459					266	405					970	448					160	385					301	531					582	460					1034	473					950	508
	1108				984	459					582	404					37	449					859	385					429	530					628	460					1108	473					1053	510
	1109				1105	458					927	405					146	448					905	385					492	531					829	459					1128	473					115	511
	1110				1194	459					948	405					443	448					402	385					168	533					1033	460					224	475					149	511
	1111				331	460					34	406					708	448					956	388					352	533					1154	460					619	474					440	511
	1112				357	460					706	406					976	449					388	386					663	533					501	460					509	476					508	511
	1113				703	460					1034	406					237	452					99	388					101	534					670	461					560	476					583	511
	1114				1124	460					118	406					396	451					121	388					652	534					470	462					1000	476					903	510
	1115				1184	462					367	407					634	450					474	388					690	534					678	462					412	477					88	512
	1116				85	461					500	408					758	450					542	388					1181	534					868	462					528	477					482	512
	1117				118	461					1069	408					1089	451					674	388					680	535					265	464					970	476					217	512
	1118				830	460					1134	408					982	452					718	388					801	534					328	463					500	478					458	512
	1119				392	462					346	408					500	454					779	388					1001	534					1196	463					698	478					493	513
	1120				578	462					679	408					510	454					175	389					18	536					147	464					785	478					226	514
	1121				713	462					1012	409					48	454					377	389					327	536					353	463					817	478					671	514
	1122				918	462					79	410					66	455					617	389					337	536					716	464					930	478					241	515
	1123				339	464					249	410					381	454					770	389					452	536					788	464					136	479					521	514
	1124				400	463					258	410					593	456					787	388					972	535					516	464					758	479					971	514
	1125				233	464					266	411					633	456					889	388					133	537					776	465					766	479					111	516
	1126				66	465					458	410					544	456					988	389					280	536					895	465					22	479					233	516
	1127				1166	466					1124	410					777	456					1036	389					1061	536					1083	466					888	480					476	516
	1128				244	467					242	410					835	456					1172	389					35	538					527	466					950	480					640	516
	1129				578	467					697	411					880	456					508	390					514	538					131	467					1131	480					683	516
	1130				832	466					1020	411					916	456					530	390					856	538					195	466					362	482					690	516
	1131				1106	466					388	412					209	458					647	390					560	539					308	467					369	482					78	517
	1132				216	468					520	412					939	458					693	390					437	540					149	468					672	481					655	517
	1133				254	468					745	411					1038	458					755	390					870	540					141	469					65	481					160	518
	1134				89	468					829	412					80	459					135	391					108	541					200	469					332	482					89	519
	1135				145	468					344	413					678	458					186	391					168	541					230	469					827	482					402	518
	1136				120	471					400	413					712	458					538	390					1000	541					333	468					1053	482					497	518
	1137				186	471					811	413					136	460					872	391					1116	541					1146	469					1192	482					586	519
	1138				308	471					924	413					185	461					948	391					876	542					1190	469					40	483					1188	518
	1139				947	471					1070	412					443	460					1123	390					279	543					288	469					702	483					483	520
	1140				226	472					803	414					809	460					598	392					376	543					599	469					842	483					614	520
	1141				966	472					910	414					40	460					115	393					462	543					666	470					1024	482					177	520
	1142				974	472					935	413					318	462					439	392					790	543					587	471					1048	483					218	521
	1143				990	472					116	415					478	461					637	393					942	542					803	471					1085	483					438	521
	1144				1136	472					179	414					1019	460					1143	393					236	544					1076	471					1143	483					603	521
	1145				316	473					309	415					408	462					99	394					303	544					407	472					289	484					772	520
	1146				824	472					884	415					83	463					272	394					517	545					628	471					539	484					100	521
	1147				1126	473					164	416					128	463					288	395					338	546					892	471					731	484					425	522
	1148				60	474					522	416					379	462					298	397					437	546					1028	472					226	485					564	522
	1149				358	474					576	416					437	462					682	396					758	546					125	472					530	485					342	523
	1150				796	474					654	416					208	464					712	396					826	546					812	473					189	486					650	525
	1151				600	476					734	416					360	464					889	396					835	546					436	474					280	486					754	524
	1152				701	475					40	418					962	464					447	397					1090	546					771	474					378	486					1132	525
	1153				808	475					110	417					573	464					475	396					252	548					309	475					466	486					454	526
	1154				1045	475					263	417					828	464					540	397					297	548					354	474					508	486					504	526
	1155				1050	475					706	418					1160	465					592	396					589	547					37	476					517	486					783	526
	1156				658	476					763	418					240	466					1155	397					1080	548					1017	476					687	486					111	527
	1157				1062	476					257	419					459	466					404	398					1110	548					147	476					882	486					497	527
	1158				121	477					433	419					508	466					513	398					122	550					316	478					1111	486					697	526
	1159				247	479					670	418					538	466					546	398					423	550					732	476					78	487					773	527
	1160				572	477					910	419					876	466					692	398					760	550					390	478					104	487					154	528
	1161				782	476					982	419					1053	466					132	401					389	551					630	478					442	488					597	528
	1162				814	477					1021	419					1113	465					706	399					1181	551					741	478					454	488					260	528
	1163				838	477					92	420					336	466					766	398					158	552					829	478					1043	489					539	529
	1164				1160	477					288	420					408	466					805	399					381	552					1038	478					1063	488					930	529
	1165				254	478					296	420					919	467					1016	398					298	553					266	479					1167	488					1034	528
	1166				411	478					735	420					1011	467					1088	399					319	552					446	478					70	489					590	530
	1167				1136	478					778	420					1038	466					276	400					334	553					809	479					850	489					613	530
	1168				791	478					790	419					374	468					120	400					558	553					946	478					890	489					903	530
	1169				56	480					888	420					633	468					127	401					978	553					123	479					502	490					228	530
	1170				705	480					246	420					684	468					253	401					82	554					801	480					586	491					332	531
	1171				328	481					505	420					766	468					366	401					474	554					675	480					725	492					354	530
	1172				430	481					684	420					53	469					456	401					490	554					1106	480					1033	492					370	530
	1173				908	480					757	421					112	469					799	400					541	555					699	482					434	493					704	531
	1174				173	482					854	421					641	468					959	401					633	553					100	483					576	493					1039	531
	1175				1144	482					1029	421					821	470					1053	401					126	554					146	482					198	494					234	532
	1176				446	482					1120	421					60	470					1058	401					246	555					120	484					390	494					443	532
	1177				954	483					1138	421					140	470					103	402					618	555					424	484					540	494					471	533
	1178				1090	482					446	422					210	470					78	403					746	555					439	484					104	495					682	533
	1179				720	484					454	422					1032	470					210	403					770	556					342	484					1092	495					1100	533
	1180				862	484					567	422					1121	469					1156	403					923	556					370	485					70	496					735	534
	1181				39	486					691	422					264	472					351	404					1174	556					490	484					597	496					244	535
	1182				370	486					116	422					274	470					448	404					138	556					645	485					936	496					758	535
	1183				171	488					338	423					313	470					785	404					845	556					918	485					630	497					213	536
	1184				716	488					813	423					706	472					1108	404					875	557					974	485					706	497					293	536
	1185				963	488					908	422					932	472					67	405					1023	557					1076	485					174	498					710	536
	1186				1076	488					310	423					686	473					328	405					905	557					231	486					836	498					752	536
	1187				158	489					428	425					1158	472					462	405					939	558					168	486					210	499					832	536
	1188				218	488					728	424					511	474					226	406					265	558					182	487					117	502					861	536
	1189				566	489					932	424					855	475					808	406					597	559					271	487					155	500					932	536
	1190				46	490					67	426					1038	474					836	407					1014	559					448	487					936	501					955	536
	1191				149	490					156	424					1112	474					1033	406					1038	559					472	487					1014	501					452	537
	1192				232	490					176	424					583	474					1088	406					422	560					580	487					1075	501					566	536
	1193				545	490					513	424					74	476					413	407					606	560					792	487					1103	501					915	537
	1194				977	489					706	424					104	476					768	407					675	560					1108	486					164	502					1145	537
	1195				989	490					788	424					360	476					828	407					726	560					1192	486					320	502					146	538
	1196				1104	490					874	425					455	476					1048	407					12	561					195	488					303	503					274	537
	1197				141	490					883	425					642	476					204	408					169	560					412	488					553	503					366	537
	1198				602	491					1084	425					966	476					1005	408					523	561					608	488					710	504					518	538
	1199				862	491					323	425					1005	478					305	408					852	560					201	488					812	504					64	538
	1200				1005	490					484	426					96	476					454	409					866	561					706	489					314	505					72	538
	1201				445	492					669	425					500	476					619	408					25	562					758	489					906	505					377	538
	1202				907	491					408	428					816	477					345	410					36	562					816	489					1020	505					1206	538
	1203				1086	492					848	427					18	478					461	410					330	562					894	488					1095	505					408	540
	1204				1176	492					558	428					26	478					887	410					588	562					935	488					230	506					678	540
	1205				62	493					770	428					152	478					322	411					683	562					255	491					1079	506					1034	540
	1206				283	492					833	428					264	478					533	411					885	561					349	491					680	507					13	541
	1207				168	494					1055	428					493	477					68	411					982	562					438	491					352	508					169	541
	1208				589	493					150	429					553	478					169	412					81	563					623	491					790	508					551	541
	1209				533	495					476	428					708	479					302	412					130	563					841	490					106	509					1178	541
	1210				615	494					694	428					777	478					385	413					178	565					1062	491					397	509					697	542
	1211				732	495					708	429					541	480					500	413					244	565					1109	490					458	509					1096	542
	1212				1121	494					778	428					688	480					1044	413					306	565					1132	491					870	509					424	543
	1213				1134	494					919	429					980	480					152	414					442	566					11	492					1011	509					1115	542
	1214				70	496					940	428					1087	480					394	414					632	565					232	492					241	510					142	544
	1215				390	496					983	428					1160	480					418	414					1056	566					1126	492					820	510					900	544
	1216				606	496					1183	428					232	482					800	413					100	567					324	493					954	510					506	545
	1217				1023	496					163	429					802	482					1016	414					158	567					823	493					374	511					686	546
	1218				1030	495					542	430					86	483					1174	414					741	567					990	493					411	511					1141	546
	1219				1108	496					871	429					270	482					434	415					52	568					618	494					1026	511					60	547
	1220				254	497					907	429					648	484					612	415					756	568					736	494					1123	511					411	546
	1221				304	497					1038	430					424	484					682	415					342	569					1162	494					1172	511					670	547
	1222				1052	496					1132	430					1080	484					922	415					854	569					135	494					764	512					702	547
	1223				342	498					173	431					494	486					1099	414					944	569					804	495					1075	513					1039	546
	1224				462	498					238	430					1111	487					224	416					1010	569					884	495					294	513					223	548
	1225				748	498					829	431					58	487					833	416					1073	571					914	495					570	513					242	548
	1226				457	499					232	431					344	486					871	415					561	572					218	496					797	513					456	548
	1227				486	499					299	432					787	486					945	417					956	572					409	496					808	513					713	548
	1228				524	498					324	432					880	486					346	417					962	572					525	496					1192	516					330	549
	1229				756	498					735	432					990	486					400	417					982	572					1138	496					59	514					876	548
	1230				410	500					1026	432					216	488					326	418					109	573					749	497					76	514					891	549
	1231				739	499					187	435					583	488					458	418					261	573					320	499					654	514					6	550
	1232				773	500					248	432					773	488					719	418					394	573					392	498					735	514					432	550
	1233				1132	500					340	433					942	488					750	418					524	573					670	499					347	515					74	551
	1234				228	501					1061	433					288	489					764	418					699	572					839	499					514	516					277	551
	1235				258	500					372	434					932	488					885	418					744	572					959	499					1160	516					390	550
	1236				402	500					592	434					256	490					35	419					1156	573					1059	498					243	517					1204	550
	1237				780	501					766	434					301	490					47	418					33	574					1114	499					1115	517					514	552
	1238				846	500					927	434					853	491					453	418					96	574					151	500					389	518					848	552
	1239				1073	501					1052	434					513	491					509	419					155	574					274	500					93	519					65	553
	1240				785	502					808	434					706	491					412	420					227	575					376	500					584	519					134	553
	1241				100	503					821	435					130	492					536	420					311	575					860	500					590	519					236	553
	1242				187	503					893	435					139	492					654	420					520	575					896	500					675	519					1139	553
	1243				378	503					540	436					341	492					706	420					912	574					912	500					1136	519					1181	554
	1244				599	503					964	436					1164	492					142	421					993	574					1190	500					234	520					402	555
	1245				668	502					204	437					1177	491					529	421					44	576					497	501					258	520					505	556
	1246				477	504					510	436					82	493					1167	420					191	576					720	500					368	520					557	556
	1247				797	504					534	436					105	492					58	422					1124	576					260	502					403	520					155	557
	1248				1031	504					688	436					114	492					92	422					277	577					329	502					1014	520					253	557
	1249				347	505					802	437					923	493					569	422					710	577					415	501					24	521					661	557
	1250				492	506					38	438					494	494					578	422					756	577					768	502					300	521					891	557
	1251				512	506					155	437					38	494					1114	422					1203	577					1007	502					439	521					1005	557
	1252				940	506					418	438					666	495					322	423					118	578					1097	502					784	521					690	558
	1253				740	507					844	438					693	494					617	423					206	578					30	504					994	521					998	558
	1254				305	508					946	438					485	496					781	423					595	577					115	502					926	522					244	558
	1255				357	508					1019	437					551	496					1086	423					435	578					520	503					1128	522					854	559
	1256				618	508					409	440					714	496					1120	423					473	578					882	502					590	524					1190	558
	1257				678	508					705	438					793	496					221	424					1181	579					984	503					704	524					654	560
	1258				1075	508					854	438					910	496					494	423					14	580					350	504					910	524					45	561
	1259				1144	509					878	440					378	498					930	424					868	580					36	505					699	526					138	561
	1260				253	510					1133	439					400	498					951	424					925	581					160	505					728	526					196	561
	1261				183	511					73	439					583	498					1105	424					1134	581					214	504					1172	526					314	560
	1262				666	510					109	440					868	498					132	425					226	582					780	505					225	527					328	561
	1263				960	511					600	440					1062	498					208	425					248	582					808	505					686	527					612	561
	1264				970	511					678	440					387	498					269	425					746	582					1134	505					858	527					224	562
	1265				354	512					1048	440					660	498					608	424					906	582					92	506					594	528					882	562
	1266				400	511					494	441					278	500					888	425					1117	582					475	505					102	528					536	563
	1267				606	512					665	440					630	500					751	426					310	583					484	506					322	530					747	562
	1268				690	512					887	440					789	500					869	425					824	582					723	505					714	530					808	563
	1269				1006	512					293	442					880	500					304	426					831	585					749	505					850	530					826	562
	1270				1033	512					419	442					33	500					475	427					872	583					956	506					979	530					920	563
	1271				1166	513					833	441					504	501					511	427					657	584					1093	506					1050	530					470	564
	1272				296	514					940	441					820	500					835	427					1156	584					1158	507					1147	530					503	564
	1273				190	514					960	442					844	502					102	428					17	585					700	508					728	531					164	565
	1274				382	514					587	445					100	502					356	428					112	584					758	508					1038	531					703	565
	1275				594	514					595	442					1084	501					391	428					633	585					845	508					1132	531					727	564
	1276				744	515					915	442					24	503					656	428					988	585					154	509					629	532					990	565
	1277				888	515					1060	443					552	502					764	428					239	586					1104	509					708	532					1057	565
	1278				1081	514					209	443					679	502					896	428					290	586					719	510					144	533					346	566
	1279				173	516					354	444					698	504					1152	428					519	586					789	509					32	534					1063	566
	1280				536	515					436	444					762	504					1160	428					42	587					266	511					186	534					1173	566
	1281				920	516					980	443					885	504					60	430					158	587					386	511					1094	534					228	567
	1282				564	517					994	444					1187	503					276	429					554	587					586	511					1159	534					336	567
	1283				642	517					1110	444					434	504					419	428					1057	587					648	511					50	535					429	567
	1284				901	516					862	445					507	505					562	429					346	588					380	513					788	535					418	568
	1285				1061	517					364	446					944	505					1022	429					402	588					890	512					801	535					564	568
	1286				228	518					372	445					313	507					326	430					692	587					1084	512					837	535					1009	568
	1287				927	518					624	446					330	506					716	430					483	589					210	513					844	535					70	569
	1288				1088	518					700	446					716	506					947	430					154	590					546	513					974	535					112	569
	1289				1159	517					796	446					915	506					1170	430					470	590					739	512					714	536					715	569
	1290				1186	518					848	447					1046	506					120	431					588	590					1092	513					201	538					761	568
	1291				547	519					1127	446					1059	506					150	431					924	590					1153	512					280	537					852	569
	1292				1122	518					770	447					388	506					208	431					233	591					351	514					303	536					973	568
	1293				388	520					986	447					632	506					777	431					551	591					371	514					639	537					551	570
	1294				718	520					38	448					1074	506					1186	431					574	590					702	514					884	537					621	570
	1295				1054	520					273	448					583	508					218	432					582	590					956	514					984	537					313	570
	1296				1144	520					294	449					208	508					402	431					948	590					1061	514					1130	537					319	571
	1297				186	521					959	449					438	510					515	432					622	591					50	515					5	538					350	571
	1298				252	521					1018	448					557	508					680	432					870	592					112	514					58	538					477	570
	1299				382	520					1082	449					31	510					899	432					1037	592					666	515					261	538					1211	571
	1300				712	521					754	450					60	510					936	432					1112	592					250	516					292	538					22	572
	1301				744	522					804	450					487	510					619	433					164	593					734	516					631	538					56	572
	1302				116	522					940	450					934	510					694	433					875	593					838	516					695	538					455	572
	1303				465	523					1120	450					280	510					808	433					18	594					868	515					910	538					989	572
	1304				801	523					1134	449					1185	511					918	433					77	594					94	517					330	540					537	572
	1305				850	522					155	450					684	512					1139	433					688	594					645	517					436	539					680	572
	1306				1131	522					239	450					699	514					230	434					324	595					1094	517					677	539					36	574
	1307				1168	523					312	451					736	512					246	434					584	594					1104	518					1111	539					434	574
	1308				1196	523					1147	452					1072	513					550	434					900	595					1142	518					130	540					967	574
	1309				313	524					68	453					790	514					790	434					924	596					170	519					592	540					12	575
	1310				1103	523					216	451					368	515					442	434					365	597					231	520					806	540					71	576
	1311				924	525					579	452					108	516					600	434					949	596					239	519					954	540					229	576
	1312				1056	524					85	452					186	516					662	435					1043	596					497	519					1024	540					242	577
	1313				793	526					355	452					228	516					830	435					738	598					268	520					1034	541					1097	576
	1314				952	526					901	453					623	516					765	436					164	599					423	520					392	542					78	578
	1315				1118	526					909	452					96	518					867	436					255	599					851	520					924	542					98	578
	1316				1149	526					161	453					218	518					1076	436					355	599					988	520					306	543					585	578
	1317				6	526					234	454					388	518					470	436					334	600					1082	522					791	542					770	578
	1318				551	527					364	454					866	518					554	437					347	600					114	521					904	543					387	579
	1319				723	526					653	453					628	520					973	436					282	601					565	520					1097	543					29	579
	1320				742	527					798	454					651	520					986	436					263	602					580	521					1206	543					316	580
	1321				752	527					931	453					924	520					1066	437					537	602					601	521					200	544					374	580
	1322				50	528					969	454					1122	520					606	438					564	602					752	520					982	544					836	580
	1323				127	528					548	455					614	520					658	438					880	602					866	520					265	545					603	581
	1324				475	528					835	454					296	522					1082	438					975	602					67	522					561	545					813	581
	1325				851	528					1011	454					372	522					219	438					78	603					223	521					634	545					399	582
	1326				935	528					583	456					68	523					586	438					556	603					353	522					642	544					576	582
	1327				1203	528					880	456					909	523					596	439					915	603					530	522					728	545					994	582
	1328				489	529					916	456					1149	524					635	439					18	604					542	522					747	545					1090	582
	1329				325	530					1133	456					1157	523					931	439					154	604					616	522					870	546					520	583
	1330				706	530					40	457					365	524					1100	439					720	604					762	522					1159	546					590	582
	1331				1064	530					775	460					715	524					83	440					370	604					1006	522					388	548					962	582
	1332				574	532					893	457					278	524					274	440					387	605					298	523					404	548					1190	582
	1333				790	532					132	458					340	525					300	440					649	605					500	523					948	548					93	584
	1334				1121	532					223	457					492	525					846	440					134	606					591	522					1060	548					913	584
	1335				185	532					241	458					642	524					189	441					144	606					929	522					766	549					1029	584
	1336				505	533					752	458					726	524					370	441					296	606					214	525					918	549					46	585
	1337				542	532					794	458					820	524					944	441					340	606					547	524					1164	548					140	585
	1338				1111	533					56	458					720	526					1168	441					679	606					632	524					133	550					160	585
	1339				1158	533					67	458					396	527					149	442					948	606					714	525					144	549					440	584
	1340				1177	532					690	458					1040	526					318	442					1114	607					1023	525					524	550					474	584
	1341				524	534					167	459					209	528					808	442					304	608					6	526					614	550					806	584
	1342				909	534					648	460					557	528					918	442					718	608					322	526					1207	550					927	585
	1343				374	535					724	460					655	528					1026	442					924	608					658	526					96	551					938	585
	1344				534	534					746	460					761	528					1119	442					1087	608					141	527					59	552					986	584
	1345				866	535					825	459					913	527					64	443					19	609					1016	527					678	552					299	586
	1346				918	535					304	462					134	528					816	443					189	609					1030	527					803	552					700	586
	1347				32	536					364	461					546	528					876	443					313	608					116	528					893	552					526	587
	1348				192	536					696	460					254	530					404	444					380	608					669	527					1098	552					467	588
	1349				95	536					1002	461					264	530					431	444					588	609					994	528					103	553					848	588
	1350				204	537					1084	461					440	530					604	447					688	609					1004	528					207	553					1071	588
	1351				443	536					1093	462					938	530					790	444					151	610					1087	527					622	553					995	589
	1352				636	537					479	462					739	530					92	445					512	610					12	529					782	553					1093	588
	1353				322	538					499	462					880	531					707	445					540	610					38	529					949	553					853	590
	1354				1006	538					542	462					359	532					759	444					646	610					383	529					364	554					289	591
	1355				1119	537					949	462					522	532					934	446					78	611					601	529					960	555					604	590
	1356				598	539					1194	462					625	532					983	444					58	612					68	530					857	556					501	592
	1357				698	539					444	464					872	534					58	446					904	612					419	530					1064	556					548	592
	1358				196	540					837	464					160	534					557	445					1066	611					485	530					1101	557					96	593
	1359				862	540					894	464					475	533					715	446					272	613					552	530					312	557					268	593
	1360				878	540					1118	464					590	534					162	447					524	614					594	530					954	558					834	593
	1361				788	541					85	465					637	534					210	447					129	616					677	530					182	559					860	592
	1362				964	541					269	464					412	534					725	447					220	617					60	531					620	559					42	594
	1363				52	542					390	465					576	534					868	447					614	617					460	531					816	559					138	596
	1364				328	542					606	466					440	536					393	447					672	618					750	530					927	559					283	596
	1365				384	542					919	464					915	536					468	448					687	618					792	531					133	559					1028	596
	1366				405	541					629	466					519	538					900	449					192	619					1021	531					499	560					328	597
	1367				541	542					636	466					717	536					257	449					297	619					1134	531					145	561					627	597
	1368				642	543					1142	466					795	537					539	448					398	618					247	532					444	561					239	598
	1369				990	543					16	467					803	537					593	449					503	619					588	532					507	561					298	597
	1370				210	544					146	466					930	537					945	449					640	619					1052	532					1106	561					406	598
	1371				751	544					506	467					998	538					1082	448					903	618					5	532					1205	561					1084	598
	1372				1055	543					687	467					290	538					674	450					320	620					348	533					883	563					268	599
	1373				1137	544					996	467					396	538					817	450					788	620					404	532					1088	563					97	599
	1374				673	545					1114	466					1154	538					311	451					214	621					522	532					1151	562					946	600
	1375				720	544					1173	467					117	540					456	450					411	621					654	533					273	564					1007	600
	1376				764	545					136	468					474	540					534	451					511	621					700	532					388	566					324	601
	1377				980	544					228	468					959	540					568	451					618	621					608	534					228	566					496	601
	1378				232	546					280	467					1145	539					892	451					778	621					669	534					502	566					525	600
	1379				572	546					740	468					106	540					876	452					232	622					817	534					722	566					789	601
	1380				628	545					624	469					151	540					967	452					1064	622					976	534					1019	566					1038	601
	1381				1038	546					1085	468					554	541					58	453					112	623					182	534					1069	566					418	603
	1382				1045	546					43	469					706	540					1066	453					881	623					597	534					834	567					750	603
	1383				370	547					100	470					509	542					1104	453					166	624					720	535					576	568					338	604
	1384				428	547					450	471					560	542					648	454					580	624					18	536					681	568					371	603
	1385				450	547					834	471					588	542					109	455					1079	624					550	536					920	568					616	604
	1386				839	547					891	471					1114	544					425	455					1150	623					1026	535					929	568					236	605
	1387				849	546					1153	470					1179	542					436	455					1169	624					1190	536					978	568					649	605
	1388				54	548					166	472					464	542					678	454					406	625					202	537					446	569					863	604
	1389				158	549					304	471					646	544					720	455					750	625					211	537					988	569					950	605
	1390				276	548					331	472					766	544					841	455					820	624					907	537					1024	569					316	606
	1391				435	548					534	472					322	544					209	456					1119	625					262	538					380	570					404	606
	1392				457	548					718	472					666	544					274	456					265	626					360	538					841	571					730	606
	1393				512	548					1106	472					999	544					303	456					351	626					1130	538					900	572					758	606
	1394				670	548					458	472					1052	546					541	455					362	626					369	539					1188	572					1017	606
	1395				914	548					68	474					134	546					1152	456					374	626					869	538					8	573					82	606
	1396				989	548					392	474					76	547					319	457					766	626					94	540					155	573					168	607
	1397				552	549					443	474					118	546					774	456					97	626					346	540					198	573					600	607
	1398				1175	549					675	474					148	546					1029	457					526	627					562	540					469	573					54	607
	1399				124	549					864	474					438	546					284	458					188	628					813	540					166	574					455	608
	1400				363	550					879	475					490	547					668	458					210	628					850	540					657	574					787	608
	1401				620	549					968	475					863	546					708	458					453	628					1006	542					682	574					987	608
	1402				1020	550					1009	475					102	548					760	458					568	628					578	542					1153	574					1029	608
	1403				1121	550					1102	475					350	548					160	459					857	628					956	542					320	576					69	609
	1404				1152	550					1169	475					674	549					752	459					31	629					1140	542					848	575					380	609
	1405				102	551					432	476					468	550					1050	459					49	629					286	543					1092	575					494	609
	1406				239	551					283	476					812	550					1115	459					256	630					399	542					794	576					475	610
	1407				730	551					362	478					226	551					307	460					426	630					464	542					382	577					1008	610
	1408				842	551					686	476					518	550					688	460					440	630					700	543					670	577					11	611
	1409				854	551					973	476					718	550					998	460					244	631					786	542					254	578					248	611
	1410				67	552					331	478					804	550					46	461					634	631					912	543					488	578					358	611
	1411				384	553					459	478					1146	550					218	461					1004	631					1074	543					720	578					693	611
	1412				928	552					696	478					958	552					794	461					758	632					721	544					901	578					739	611
	1413				1008	553					1036	478					182	552					105	462					874	632					972	544					455	579					758	610
	1414				1018	554					46	478					290	553					394	462					886	631					1160	544					598	579					851	610
	1415				1048	554					109	479					438	553					471	462					462	633					191	544					765	579					1080	611
	1416				1160	554					150	478					846	552					538	462					512	633					549	545					1207	579					524	612
	1417				1201	554					171	479					134	554					568	462					567	632					1035	545					359	580					869	612
	1418				247	555					918	479					306	556					248	463					615	635					841	546					714	580					1103	612
	1419				355	555					55	479					350	556					340	463					692	632					1106	546					1016	580					364	613
	1420				442	556					371	480					759	556					592	463					744	633					417	547					1144	580					516	613
	1421				789	556					732	479					637	557					846	463					986	633					848	547					394	581					909	612
	1422				798	556					522	481					784	558					1006	463					1085	632					1166	547					790	580					116	613
	1423				1000	556					1010	481					1202	558					68	464					119	634					24	548					575	582					946	614
	1424				1033	556					281	482					1210	558					79	464					266	634					81	548					925	582					954	614
	1425				4	557					300	482					388	559					789	464					712	634					96	548					34	583					316	615
	1426				75	557					741	482					687	559					1019	464					684	635					578	548					366	583					348	615
	1427				117	556					1104	482					159	560					128	465					1167	634					459	549					634	583					448	616
	1428				578	557					398	483					744	560					851	465					725	636					467	549					668	583					890	616
	1429				619	557					768	483					280	560					908	465					772	636					930	548					1173	582					238	617
	1430				963	556					844	483					429	560					1032	464					1143	636					151	550					406	584					594	616
	1431				432	558					1025	483					812	560					1166	464					6	636					759	550					603	585					964	617
	1432				870	558					108	484					442	562					371	467					355	637					134	550					899	586					1054	617
	1433				987	558					653	483					598	562					422	466					1104	637					365	551					137	585					172	618
	1434				82	559					793	483					731	562					437	467					46	638					632	551					261	586					359	618
	1435				570	558					1109	486					906	562					605	466					61	638					643	550					348	586					575	618
	1436				591	558					1170	484					1194	563					316	467					80	638					795	550					1011	587					998	618
	1437				236	560					100	486					134	564					724	467					169	638					831	551					1114	586					1016	618
	1438				1199	560					340	486					372	564					1159	466					570	638					57	552					1162	587					217	618
	1439				127	560					804	486					724	564					62	468					1028	638					188	552					1206	587					559	619
	1440				818	561					870	485					74	564					528	468					787	638					278	552					177	588					698	619
	1441				860	560					875	485					766	564					648	468					1160	639					508	552					208	588					738	618
	1442				1208	561					914	486					788	564					775	467					130	640					801	552					770	589					260	620
	1443				310	562					1064	486					972	565					799	468					139	640					912	551					266	589					500	620
	1444				1068	562					148	486					217	566					827	468					632	640					1121	552					484	589					540	620
	1445				265	563					236	487					476	566					862	468					718	640					113	553					664	589					624	620
	1446				433	563					786	487					533	566					914	468					948	640					354	553					390	590					630	620
	1447				586	563					572	488					696	566					213	469					454	641					426	553					421	590					930	620
	1448				809	562					633	488					900	566					348	469					87	642					862	553					431	590					59	620
	1449				1195	563					709	488					1164	566					688	468					350	642					1011	554					1132	590					446	621
	1450				488	563					838	488					390	566					19	470					688	642					1107	553					169	591					583	621
	1451				495	564					489	489					598	567					84	470					706	642					310	554					344	591					764	621
	1452				956	564					586	488					967	566					102	470					488	643					1144	554					76	592					785	621
	1453				1184	564					686	489					236	568					115	470					912	643					27	554					124	592					878	620
	1454				366	565					67	490					626	568					523	470					923	642					242	556					187	592					1004	620
	1455				463	564					397	490					293	568					708	470					601	644					457	556					1072	593					1036	621
	1456				93	566					508	490					461	568					759	470					724	644					850	556					494	593					130	622
	1457				135	566					780	490					613	568					55	471					906	644					1074	555					628	593					234	621
	1458				158	566					829	490					738	569					148	471					938	644					147	556					766	593					439	622
	1459				272	566					942	490					945	569					360	471					1156	644					630	556					808	593					917	622
	1460				288	566					1198	490					442	570					637	471					332	645					835	556					140	594					1183	622
	1461				869	566					216	491					977	570					1197	471					882	645					959	556					418	594					281	623
	1462				204	567					625	491					132	572					612	472					1189	644					1032	556					427	594					343	622
	1463				318	566					671	491					1166	570					995	472					424	647					78	556					447	594					478	622
	1464				375	566					1100	491					774	572					78	473					824	647					694	557					709	594					138	624
	1465				814	566					154	491					901	572					472	472					986	647					790	556					210	595					685	624
	1466				1031	567					478	492					603	573					501	472					1081	647					222	558					262	595					890	624
	1467				146	568					722	492					272	574					534	473					724	649					1162	558					1096	595					907	624
	1468				1078	568					788	492					594	574					792	473					1019	648					584	559					1153	594					1129	624
	1469				119	570					1168	492					984	574					870	472					608	650					914	558					282	596					8	625
	1470				282	570					19	492					306	574					134	474					682	650					131	560					334	597					197	625
	1471				1118	570					193	493					430	574					323	474					690	650					550	560					1136	597					955	625
	1472				462	570					275	492					852	575					374	474					968	649					592	560					6	598					994	624
	1473				18	572					418	493					878	574					381	474					87	650					725	559					240	599					239	626
	1474				256	572					705	493					897	575					388	474					774	651					1053	560					662	599					512	626
	1475				737	572					1049	493					656	576					575	473					1042	651					1105	559					928	599					883	626
	1476				29	573					234	494					924	576					1132	474					8	652					571	560					986	599					288	627
	1477				134	573					389	494					320	576					158	475					19	652					698	560					1178	599					335	627
	1478				474	573					824	494					606	576					434	475					526	652					753	560					130	600					272	628
	1479				772	573					954	494					74	578					726	475					1181	652					1133	561					330	600					341	628
	1480				704	574					1038	494					296	578					1040	475					123	652					348	562					566	600					713	628
	1481				507	574					85	494					672	578					56	475					396	652					452	562					577	600					765	628
	1482				1131	574					102	494					135	580					182	476					551	653					783	562					688	600					697	628
	1483				208	576					212	495					160	578					669	476					696	653					814	562					950	600					823	628
	1484				380	576					252	495					220	580					733	476					846	653					879	561					1026	600					1185	628
	1485				400	576					284	494					344	580					139	477					913	652					1072	562					34	602					560	630
	1486				559	576					610	494					393	580					1001	477					596	654					392	563					269	602					920	630
	1487				710	576					895	494					912	580					1189	477					792	654					460	562					417	601					959	630
	1488				726	576					962	495					1042	581					638	478					1100	653					737	562					28	602					633	631
	1489				219	577					1024	496					1054	581					1102	478					75	655					969	562					143	602					780	630
	1490				920	577					574	496					859	582					1109	478					257	656					195	564					493	602					62	632
	1491				233	578					674	496					988	583					84	479					980	656					508	564					854	602					156	632
	1492				474	578					1014	496					295	584					460	478					1074	656					74	564					1072	602					646	632
	1493				526	578					257	497					388	584					647	479					100	657					381	565					258	603					430	633
	1494				550	578					338	497					555	584					738	479					168	657					478	565					655	603					990	632
	1495				1047	578					623	497					177	584					1177	479					428	658					863	564					706	603					943	634
	1496				64	579					742	496					189	584					214	480					544	658					224	566					178	604					1026	634
	1497				824	578					798	497					707	585					575	480					925	658					898	566					1174	604					348	635
	1498				416	580					906	496					1209	585					477	480					1119	658					953	566					1185	603					963	635
	1499				740	580					216	498					52	586					584	481					87	659					499	567					544	605					1015	635
	1500				1124	580					330	498					742	586					816	481					452	659					852	567					564	606					118	636
	1501				30	581					940	497					919	586					957	481					1020	658					1136	567					500	606					382	636
	1502				128	581					1095	497					344	586					1057	481					1169	659					720	568					578	606					641	636
	1503				260	580					1191	497					354	586					309	482					601	660					791	568					704	606					711	636
	1504				724	581					154	498					423	588					329	482					788	660					255	569					832	606					372	636
	1505				1032	581					545	498					678	587					501	482					934	660					282	569					881	606					217	638
	1506				8	582					604	498					527	588					828	482					180	661					308	569					900	606					388	639
	1507				164	582					715	499					536	588					190	483					877	661					786	568					1189	606					522	638
	1508				776	582					1172	498					548	588					386	483					693	662					912	569					56	607					1165	639
	1509				786	582					316	500					808	588					438	483					836	663					68	570					264	608					102	639
	1510				94	583					444	500					924	588					763	483					1156	663					300	570					330	607					158	639
	1511				293	583					89	501					130	590					1172	483					251	664					360	570					776	607					432	640
	1512				330	582					490	501					586	591					39	484					258	664					704	570					792	606					624	640
	1513				464	585					777	500					780	590					516	484					1079	664					765	569					814	607					1211	640
	1514				986	585					13	501					1016	590					725	484					192	665					630	570					917	607					40	640
	1515				185	586					167	501					1061	590					846	484					201	665					1051	571					96	608					129	640
	1516				352	586					351	502					3	592					1028	484					446	665					561	572					588	608					276	641
	1517				420	586					396	501					212	591					15	485					489	665					118	572					210	609					347	641
	1518				551	586					890	501					605	590					528	485					500	665					134	574					430	609					737	640
	1519				1082	586					824	503					768	590					174	486					526	665					321	574					444	609					870	641
	1520				675	586					1099	503					1084	590					645	486					660	665					989	574					513	609					693	642
	1521				685	586					97	504					24	592					746	486					100	666					1030	573					920	608					915	642
	1522				953	586					806	504					93	592					752	486					148	666					1062	574					1138	608					210	642
	1523				359	588					83	505					494	592					775	486					374	666					165	575					996	610					1058	642
	1524				1034	588					234	505					504	592					987	486					431	666					228	574					308	611					61	644
	1525				28	589					336	505					572	592					996	486					669	666					241	574					836	611					399	644
	1526				162	589					371	505					46	592					30	487					884	666					275	574					1020	611					476	644
	1527				274	589					183	505					482	593					112	486					181	667					371	575					136	612					1128	644
	1528				301	588					198	506					628	592					248	486					1036	667					1041	575					185	612					681	644
	1529				380	589					356	505					221	595					866	487					118	669					1148	576					548	612					343	646
	1530				522	589					704	505					564	594					922	487					471	668					894	576					766	612					469	646
	1531				693	589					124	506					804	595					1064	487					815	669					63	577					1050	612					512	646
	1532				966	589					388	507					443	597					1108	487					83	670					331	577					742	613					616	646
	1533				998	589					439	507					494	595					62	488					238	670					527	577					1006	613					643	646
	1534				1090	589					570	507					962	595					122	488					611	670					736	577					1185	613					1070	646
	1535				282	590					616	506					342	596					134	487					980	669					761	577					670	614					1096	646
	1536				293	590					714	507					707	596					314	488					1056	670					804	576					1037	614					482	647
	1537				404	590					816	507					1192	596					739	488					280	671					31	578					216	615					907	646
	1538				533	590					974	507					106	598					1091	488					674	671					558	578					224	615					290	648
	1539				181	591					1008	507					482	599					233	488					602	672					1006	578					478	615					621	648
	1540				190	591					158	507					518	598					284	489					550	673					700	579					1153	616					940	648
	1541				564	591					326	508					596	598					799	489					214	675					856	579					258	616					1168	648
	1542				572	590					526	508					726	598					966	488					1138	675					1095	578					622	617					517	650
	1543				587	591					884	508					1150	598					1012	489					447	676					92	580					954	617					657	650
	1544				1182	590					170	508					511	598					1056	491					546	676					750	580					6	618					716	650
	1545				828	592					444	509					682	598					1161	489					618	676					812	580					323	618					839	650
	1546				1008	592					496	509					470	600					422	490					1149	676					886	580					444	618					936	650
	1547				206	593					551	509					748	600					901	490					247	677					40	581					494	618					1207	650
	1548				329	593					695	509					753	600					1100	490					511	677					114	582					594	618					5	650
	1549				555	593					730	509					1112	600					1148	490					666	677					843	581					120	620					150	651
	1550				109	594					1046	508					186	600					104	491					812	676					46	582					370	620					403	650
	1551				315	593					164	510					553	601					190	491					258	678					196	582					40	620					772	650
	1552				344	594					450	510					1169	601					82	492					776	678					628	582					270	620					589	652
	1553				646	594					742	510					1186	601					113	492					977	678					917	582					1057	620					865	652
	1554				720	594					892	510					32	602					766	492					534	679					1036	582					671	621					892	652
	1555				1043	594					912	509					200	602					772	492					757	678					511	582					768	621					1157	652
	1556				1064	594					1126	511					250	602					846	492					118	680					943	583					1028	621					1182	653
	1557				1138	594					350	510					156	602					602	493					148	680					294	584					1133	620					60	654
	1558				36	595					378	510					421	602					1156	493					464	680					312	584					1175	621					282	654
	1559				322	595					402	512					697	602					34	494					704	680					1062	584					302	622					986	654
	1560				423	595					979	510					804	602					154	494					817	680					182	585					352	622					326	655
	1561				517	595					227	512					979	604					430	493					297	680					505	584					1051	622					408	655
	1562				636	595					806	512					55	606					808	494					321	680					89	586					333	623					929	654
	1563				190	596					963	512					293	604					912	494					439	681					222	586					632	623					192	656
	1564				434	596					996	512					368	604					312	495					769	682					419	586					32	623					225	656
	1565				381	597					131	512					554	605					355	495					1134	682					463	585					547	624					355	656
	1566				438	597					294	513					789	605					389	495					18	683					543	586					910	624					555	656
	1567				714	597					504	512					382	606					415	495					50	683					842	587					884	625					812	657
	1568				905	597					705	513					354	606					790	495					282	683					1007	586					1066	625					1210	656
	1569				1051	597					728	513					672	606					849	495					400	683					686	587					1115	624					318	658
	1570				723	598					372	514					436	608					940	495					574	683					1066	588					116	627					935	658
	1571				730	598					567	514					780	608					1202	495					1000	683					1097	588					240	627					278	659
	1572				103	599					201	516					1042	608					285	496					1140	683					1138	587					636	627					844	658
	1573				870	599					340	515					686	608					454	496					656	684					722	588					804	627					125	660
	1574				914	598					526	516					764	609					1021	496					661	684					60	590					1164	629					455	660
	1575				343	600					620	514					811	608					1132	495					670	684					787	590					245	630					770	660
	1576				595	599					784	514					1057	609					394	497					786	684					1127	590					334	630					777	660
	1577				837	600					858	515					279	610					446	497					942	684					1144	590					457	630					789	660
	1578				896	600					124	516					372	610					488	497					1010	684					468	591					478	630					925	660
	1579				135	601					552	516					482	610					682	498					28	685					653	590					1028	630					656	660
	1580				177	602					639	515					204	610					704	496					58	684					858	591					1159	630					989	661
	1581				223	602					716	516					267	611					854	497					92	685					104	592					226	631					1114	660
	1582				538	602					903	517					340	610					1108	498					407	684					701	592					572	631					1126	660
	1583				640	602					19	518					469	611					795	499					651	685					1062	592					599	631					30	662
	1584				799	602					42	517					708	611					980	499					1019	684					1135	592					1128	631					152	662
	1585				809	602					158	518					834	610					990	499					224	686					204	593					202	633					292	662
	1586				827	602					323	518					896	610					1097	499					268	686					540	593					34	633					576	662
	1587				109	602					1096	518					977	611					147	500					618	686					1116	592					900	634					955	662
	1588				953	602					275	518					628	612					1192	500					996	685					1209	593					1048	634					998	662
	1589				961	603					474	519					988	611					599	501					1147	686					22	596					76	634					384	663
	1590				465	604					700	519					1140	612					842	501					1176	686					116	594					690	635					973	662
	1591				196	604					758	518					256	612					916	501					1196	686					762	594					1079	634					311	663
	1592				79	606					1044	518					949	612					1074	500					529	687					1163	594					1139	634					614	664
	1593				492	606					1114	520					984	614					334	502					548	686					318	595					256	636					840	664
	1594				603	606					36	520					30	615					418	502					377	688					719	594					338	636					1042	664
	1595				1034	606					308	520					210	614					867	502					484	688					902	595					345	636					129	665
	1596				135	607					608	520					222	615					929	501					86	689					1099	595					548	636					565	664
	1597				411	607					616	520					361	615					74	503					329	689					708	596					732	636					691	665
	1598				785	607					1141	519					641	614					132	503					117	690					1078	596					437	637					1057	664
	1599				1043	606					233	521					651	614					448	503					259	690					34	596					697	638					1073	665
	1600				64	608					531	521					928	615					560	502					546	690					265	597					939	638					1200	665
	1601				114	608					833	520					81	616					789	502					178	691					292	596					1134	638					206	666
	1602				280	608					999	521					266	616					537	505					191	690					1189	598					120	639					649	666
	1603				332	608					1073	521					132	618					1055	505					402	691					634	599					153	639					1079	666
	1604				542	608					172	521					543	618					1163	504					47	692					1112	599					946	639					107	666
	1605				614	608					296	522					13	618					200	506					185	692					514	600					1048	641					142	667
	1606				688	608					335	522					140	618					348	506					612	692					622	600					594	640					271	666
	1607				813	608					707	522					886	619					391	505					890	692					890	600					700	640					60	668
	1608				914	608					1064	521					463	620					499	506					123	693					60	600					874	640					85	668
	1609				453	609					503	523					530	620					512	506					317	692					837	601					1082	642					678	668
	1610				805	608					656	523					599	622					529	506					389	693					252	602					229	641					697	668
	1611				1080	609					460	524					896	620					798	506					1176	692					390	602					530	645					1064	668
	1612				286	611					675	523					1126	620					860	506					269	694					567	602					576	641					226	670
	1613				703	611					912	524					448	620					934	506					786	694					988	602					792	641					907	670
	1614				711	611					992	524					488	621					1195	506					287	696					1005	602					1138	641					1208	670
	1615				726	611					1025	524					147	622					61	506					466	695					1101	602					1168	640					824	670
	1616				1164	611					1058	524					245	622					266	507					902	695					1161	602					196	642					963	670
	1617				40	612					1096	524					286	622					850	507					1128	695					317	603					284	642					355	672
	1618				144	612					211	524					342	622					1087	506					309	696					92	604					710	642					413	672
	1619				412	612					225	525					1137	622					1109	507					333	696					553	605					834	642					562	672
	1620				466	612					363	525					72	623					1131	507					402	696					881	605					587	643					581	672
	1621				551	611					639	525					480	622					144	508					915	696					208	606					598	643					32	673
	1622				358	612					88	526					766	622					280	508					1018	696					226	606					459	645					245	672
	1623				405	613					294	526					986	622					404	508					1084	695					233	606					722	645					477	672
	1624				858	613					625	526					1159	622					482	508					148	697					518	606					941	645					858	672
	1625				1031	613					731	526					81	624					508	508					354	697					787	606					1014	645					1087	673
	1626				338	614					260	528					156	624					567	508					956	697					858	605					1131	645					656	674
	1627				811	614					667	528					308	624					606	508					1093	697					893	606					1206	644					1020	674
	1628				956	614					834	528					262	624					601	510					802	698					22	608					922	646					308	676
	1629				1117	614					875	528					440	624					901	509					940	698					490	608					927	646					328	676
	1630				5	614					973	527					230	627					927	510					87	698					665	608					814	647					265	678
	1631				332	615					61	528					544	627					206	511					121	700					1083	608					118	648					484	678
	1632				491	614					404	528					556	627					242	511					251	699					986	609					342	648					20	679
	1633				547	614					477	528					988	627					555	510					758	698					1110	609					478	648					208	679
	1634				797	615					567	528					53	628					739	511					480	700					548	610					776	648					580	679
	1635				936	615					576	529					223	628					1138	511					624	700					942	610					1072	648					774	679
	1636				1000	615					690	529					326	628					19	512					826	700					83	612					466	649					983	678
	1637				1054	614					724	529					371	628					113	512					1049	700					106	612					572	648					1172	680
	1638				180	616					940	529					511	628					130	512					160	703					272	612					582	649					109	681
	1639				692	616					516	530					572	628					979	511					203	702					505	611					641	649					296	681
	1640				1042	616					756	530					620	628					628	513					497	702					527	612					729	648					464	680
	1641				318	617					1000	530					706	629					750	512					814	702					572	612					746	649					865	681
	1642				828	617					1140	530					4	629					786	512					1014	701					910	611					988	649					1020	681
	1643				862	617					24	531					123	628					792	512					838	703					563	612					689	650					142	682
	1644				373	618					621	530					283	628					1083	513					362	704					756	613					882	650					554	682
	1645				502	618					700	531					528	628					272	514					413	704					832	612					1132	650					633	682
	1646				596	618					735	531					587	628					291	514					594	704					312	614					608	652					666	682
	1647				1111	617					771	530					768	630					298	514					654	704					341	613					864	651					1204	682
	1648				1132	618					893	531					1010	629					389	514					938	704					1123	614					1188	651					48	683
	1649				712	619					172	531					18	630					494	514					28	705					966	614					230	652					974	683
	1650				729	619					926	532					344	630					936	514					687	706					90	616					318	652					306	684
	1651				913	618					1025	532					408	630					192	514					819	706					1032	616					494	652					328	684
	1652				1103	619					4	532					488	630					437	515					908	705					24	618					724	652					335	684
	1653				1120	619					246	532					1080	630					522	515					920	706					67	617					455	653					729	684
	1654				264	620					350	533					1112	630					944	515					962	706					691	617					945	653					1000	684
	1655				356	620					714	533					28	630					1001	515					1064	705					944	617					1004	653					1164	684
	1656				892	620					825	533					498	630					340	516					1085	706					171	618					1170	653					603	686
	1657				1032	619					941	533					1211	631					411	516					116	706					993	618					108	654					235	687
	1658				1196	620					628	534					109	632					442	516					625	706					1184	618					1084	654					349	687
	1659				866	621					992	533					309	632					477	516					1021	706					140	619					1120	654					548	686
	1660				1138	620					1080	534					585	632					861	516					1029	706					242	619					884	655					784	687
	1661				1161	620					422	534					862	632					142	517					188	708					382	618					566	656					360	688
	1662				424	622					1125	534					900	632					186	516					305	708					542	619					1095	656					682	688
	1663				576	622					291	536					1030	633					585	517					322	708					787	618					311	657					825	688
	1664				874	622					875	536					990	634					44	518					340	708					102	620					423	657					923	688
	1665				231	623					85	537					1018	634					116	518					373	708					406	621					485	657					418	689
	1666				588	623					276	536					1184	634					208	518					517	709					204	620					558	657					752	689
	1667				615	622					674	536					62	634					307	518					572	709					572	621					1210	657					905	688
	1668				681	622					705	537					70	634					551	518					604	709					1149	621					269	658					710	690
	1669				814	623					1016	536					447	635					242	518					749	709					1168	621					442	658					1005	690
	1670				821	622					102	538					789	635					794	518					412	710					214	622					780	658					1020	690
	1671				886	623					219	538					868	635					72	520					432	710					306	622					926	658					354	691
	1672				269	624					750	538					1046	635					166	520					647	710					751	622					1194	658					623	691
	1673				292	624					959	538					393	636					213	520					869	710					1124	622					47	659					88	692
	1674				391	624					376	539					827	636					504	520					402	710					165	622					168	658					410	692
	1675				940	624					514	538					1144	636					226	520					500	711					608	623					370	659					600	692
	1676				1168	624					866	538					22	637					334	521					938	711					766	623					765	658					744	692
	1677				626	625					920	538					247	636					700	521					445	712					855	622					860	659					887	692
	1678				744	625					929	538					281	638					45	522					667	712					666	624					284	660					1105	692
	1679				758	625					1168	539					634	637					59	522					356	713					1180	624					354	660					110	693
	1680				9	626					452	540					1097	637					374	522					572	714					17	624					660	660					655	693
	1681				565	626					460	540					46	638					896	522					1028	714					334	624					1026	660					820	693
	1682				768	626					624	540					156	638					1115	522					111	716					623	624					612	662					953	693
	1683				856	626					772	540					642	638					152	523					181	715					490	626					772	662					998	692
	1684				19	627					816	540					730	638					406	523					368	715					496	626					836	662					1011	692
	1685				154	627					945	540					799	637					441	522					522	715					658	626					488	663					1140	692
	1686				356	627					435	541					1121	638					632	523					1035	715					683	626					735	663					156	694
	1687				643	627					467	541					270	639					817	523					1100	715					1116	626					754	663					534	694
	1688				1049	626					1090	540					1104	639					842	523					536	716					374	627					788	662					939	694
	1689				200	628					634	542					258	640					1202	523					553	715					466	627					988	663					119	694
	1690				270	628					672	542					651	640					494	524					609	716					568	626					1062	662					1033	694
	1691				485	628					807	542					170	641					623	525					662	716					998	628					560	664					596	696
	1692				944	627					234	543					533	640					254	526					942	716					1031	628					666	664					699	696
	1693				956	628					400	543					809	640					264	526					380	717					940	628					448	665					803	696
	1694				996	628					490	543					202	642					340	526					838	716					1144	629					504	665					575	696
	1695				287	629					500	543					320	642					426	526					970	717					1158	629					639	665					663	698
	1696				343	629					615	543					862	642					452	526					154	718					626	630					1048	665					684	697
	1697				978	629					875	542					958	642					479	526					550	718					971	630					314	666					1081	698
	1698				576	630					1016	543					1203	642					534	526					844	718					24	630					396	666					379	699
	1699				583	631					1066	543					216	642					930	526					478	719					59	631					620	667					415	698
	1700				186	632					1124	543					248	643					1046	526					1062	718					306	631					1008	666					517	698
	1701				382	632					8	545					394	644					1059	526					346	720					736	631					454	668					107	700
	1702				964	632					241	544					596	642					705	527					354	720					495	631					480	668					286	700
	1703				1161	632					838	544					900	642					794	526					462	721					835	632					847	668					1136	700
	1704				116	632					1111	544					4	644					939	526					494	721					194	633					350	669					535	700
	1705				227	632					1156	543					240	644					1028	527					40	722					800	633					432	669					978	700
	1706				318	633					31	545					468	644					23	528					52	722					212	634					378	670					639	702
	1707				434	633					60	544					522	644					156	528					404	723					557	634					465	670					677	702
	1708				901	633					64	545					764	644					230	528					534	723					579	634					722	670					1044	702
	1709				45	634					218	545					51	644					411	528					624	722					604	634					912	670					952	702
	1710				198	634					519	544					270	645					467	528					746	723					1098	634					963	670					211	704
	1711				640	634					920	545					311	645					569	528					960	723					449	635					134	671					609	704
	1712				844	634					1047	544					502	646					781	528					138	725					1034	635					210	671					753	704
	1713				913	633					1085	545					514	645					85	529					264	725					340	635					313	672					1019	704
	1714				407	635					1132	544					948	644					360	530					881	724					481	636					740	672					1033	704
	1715				1189	635					87	545					354	646					384	530					994	725					492	636					828	672					1056	704
	1716				238	636					102	545					90	646					92	530					1070	725					762	636					992	672					570	705
	1717				884	636					143	545					94	647					605	531					1158	725					920	635					374	673					1089	704
	1718				1156	636					688	546					203	647					814	531					86	726					487	637					789	673					1099	705
	1719				1197	636					830	545					337	646					852	531					860	726					222	638					128	674					1176	704
	1720				130	637					363	547					376	646					1022	531					907	726					347	638					158	674					265	706
	1721				148	636					664	547					403	646					97	532					947	726					900	637					204	675					416	706
	1722				742	637					711	547					1034	646					353	532					98	727					1184	637					400	675					654	706
	1723				25	637					753	546					1136	646					546	532					222	727					140	638					485	675					836	705
	1724				35	638					799	547					66	648					1036	532					375	727					404	639					1062	675					944	706
	1725				360	638					887	546					1150	648					123	532					579	728					431	638					1175	674					1187	706
	1726				1018	638					26	548					605	648					564	533					1060	728					993	639					1194	674					160	707
	1727				52	639					276	549					659	648					978	533					256	729					2	640					233	676					372	707
	1728				343	640					294	548					724	650					1104	534					409	728					389	639					258	676					849	708
	1729				482	638					496	548					873	649					614	534					1010	729					793	640					524	676					207	708
	1730				1102	639					527	548					1026	648					960	534					120	730					34	641					682	676					226	709
	1731				1177	639					641	548					14	650					1007	533					586	730					1066	641					782	676					601	708
	1732				2	640					772	548					316	650					1158	534					1154	730					1010	642					141	677					189	709
	1733				155	640					196	549					471	650					294	534					1168	730					1024	642					212	678					389	710
	1734				454	640					233	548					546	650					415	534					105	730					1112	642					604	678					478	711
	1735				640	641					811	549					898	650					1047	535					286	732					130	643					836	678					976	711
	1736				898	641					966	549					1064	650					608	537					454	732					804	643					1006	679					550	712
	1737				988	641					1162	549					50	650					678	536					508	732					482	644					1155	678					570	712
	1738				1078	641					491	550					490	650					781	536					699	732					754	644					151	679					595	712
	1739				412	642					535	550					744	650					969	536					864	731					27	645					175	678					766	712
	1740				432	642					680	550					216	652					1029	536					912	732					79	644					330	679					868	712
	1741				1069	642					779	550					524	652					23	537					1087	732					900	645					406	680					173	713
	1742				1187	642					1071	550					622	652					461	537					628	733					141	646					1013	679					949	713
	1743				68	643					356	551					310	652					718	536					892	733					346	645					1026	679					1060	712
	1744				732	642					428	551					320	654					48	538					956	733					496	646					1094	679					1048	714
	1745				866	643					481	551					684	655					84	538					1121	733					695	646					432	680					188	716
	1746				236	644					624	550					708	654					120	538					92	734					1082	646					682	680					245	716
	1747				253	644					141	552					337	654					436	538					416	734					1126	646					707	680					303	716
	1748				388	644					262	551					60	656					706	538					844	734					929	646					795	680					640	716
	1749				1064	644					939	552					146	656					808	538					104	735					678	650					954	680					1091	716
	1750				1144	644					1133	552					538	656					1122	538					857	735					1051	650					1114	680					385	717
	1751				354	644					30	552					554	656					145	539					162	736					1008	651					42	682					406	717
	1752				620	645					61	552					976	656					157	539					192	736					1058	650					262	681					450	718
	1753				720	645					240	553					34	657					724	538					70	737					1144	651					764	680					522	718
	1754				1137	644					500	553					185	656					768	539					534	737					227	652					785	680					535	718
	1755				4	646					634	553					326	657					858	539					700	737					1118	652					550	682					681	718
	1756				274	646					805	553					364	656					138	540					813	737					1169	652					584	682					370	719
	1757				450	647					584	554					700	656					633	540					831	737					184	653					712	682					552	718
	1758				488	647					738	554					872	656					347	541					1041	736					421	653					89	683					46	720
	1759				610	647					873	554					1063	657					641	540					1159	736					636	653					205	684					180	720
	1760				640	647					904	554					300	658					672	540					321	738					993	653					393	683					211	720
	1761				286	648					964	554					476	658					98	542					292	739					102	653					504	683					544	720
	1762				1087	648					974	553					1086	658					106	542					458	739					508	654					1061	682					773	720
	1763				1126	648					1020	554					244	658					186	542					762	739					834	654					520	684					975	720
	1764				243	649					1111	553					480	658					210	542					1027	738					145	654					1198	684					1180	720
	1765				1079	649					1156	555					564	658					222	542					718	740					428	655					801	685					22	721
	1766				84	650					196	555					575	658					419	542					976	740					1193	655					238	686					706	720
	1767				392	650					324	555					749	662					545	542					1012	740					275	656					288	686					1039	720
	1768				649	650					329	555					950	660					820	542					751	741					896	656					462	686					244	723
	1769				198	651					620	554					1068	660					824	542					952	741					1082	655					614	686					299	722
	1770				493	651					882	555					210	662					924	542					742	742					120	657					1084	686					307	723
	1771				1054	651					231	555					352	662					932	542					52	743					162	657					1127	686					579	723
	1772				378	652					350	556					465	662					959	542					496	742					1051	657					1185	686					1060	723
	1773				534	652					494	556					718	662					973	541					513	742					1185	658					337	687					364	724
	1774				658	652					568	555					771	662					996	542					588	743					304	658					788	686					167	725
	1775				884	652					600	556					556	664					1107	541					635	743					414	658					940	687					342	724
	1776				1071	651					656	556					532	664					1136	542					1089	743					142	658					642	688					790	724
	1777				1093	652					696	556					1173	664					113	543					189	744					235	658					1068	688					947	724
	1778				309	652					548	557					60	666					302	543					256	744					323	658					1193	688					1129	724
	1779				524	653					1016	556					779	666					578	543					240	744					344	659					541	689					1149	725
	1780				332	654					130	558					969	666					605	544					400	745					990	659					1116	688					16	726
	1781				504	654					173	558					68	667					1152	542					850	744					1044	659					262	691					833	726
	1782				518	654					473	558					650	667					1158	543					154	746					316	660					654	690					869	726
	1783				580	654					538	558					182	668					618	544					325	746					423	660					1029	690					30	727
	1784				687	654					370	560					312	668					636	544					445	746					667	660					435	691					428	726
	1785				811	654					743	559					822	668					717	543					901	746					716	660					444	691					926	727
	1786				843	654					771	559					948	668					835	544					982	746					1159	660					468	692					1012	726
	1787				401	655					905	559					1104	668					886	544					26	747					490	661					1168	691					96	728
	1788				626	655					261	560					467	669					28	545					1158	747					806	661					750	692					156	728
	1789				957	655					594	559					475	669					690	545					94	748					831	661					890	692					415	728
	1790				978	655					604	560					110	670					802	545					108	748					598	662					981	692					466	728
	1791				854	656					612	560					393	670					11	546					492	748					1178	662					1068	692					714	728
	1792				236	657					894	560					493	669					146	546					660	748					582	663					1100	692					781	728
	1793				494	657					97	560					876	670					439	546					738	748					789	663					561	693					855	728
	1794				572	657					570	560					932	670					782	546					82	749					6	664					914	693					972	728
	1795				631	656					124	562					448	670					897	546					130	749					255	664					197	694					1103	728
	1796				647	657					276	561					673	670					946	546					164	749					288	664					777	694					272	730
	1797				1016	657					352	562					964	670					984	546					207	749					848	664					1022	694					585	730
	1798				455	658					446	562					1015	671					1044	546					518	749					1018	664					148	695					549	731
	1799				542	658					926	562					1060	670					52	547					1140	748					1039	664					182	695					678	730
	1800				1059	658					966	562					1178	670					446	547					412	750					863	664					289	695					873	730
	1801				393	659					9	563					1184	670					707	546					629	750					950	664					361	696					1137	731
	1802				508	659					316	563					234	671					974	546					154	752					1024	665					792	695					250	732
	1803				39	660					707	562					716	672					231	548					499	752					438	666					828	694					1098	733
	1804				72	659					712	562					844	672					529	548					578	752					1098	666					894	695					266	734
	1805				117	660					759	562					994	673					939	548					944	752					1171	666					907	695					299	734
	1806				677	660					1134	562					1100	672					16	549					190	752					271	666					111	696					338	734
	1807				694	660					177	564					264	672					137	549					325	753					80	668					372	697					1006	734
	1808				821	660					307	564					756	673					368	549					430	753					323	668					381	697					1116	734
	1809				911	660					635	564					80	674					470	549					35	753					376	668					99	698					44	735
	1810				1007	660					989	563					309	674					978	548					256	754					394	668					271	699					146	735
	1811				1038	660					1048	564					408	674					1091	549					252	755					980	668					388	698					423	735
	1812				1177	660					1156	564					427	674					1155	548					288	755					1114	669					68	700					741	735
	1813				12	661					627	565					494	674					85	550					390	755					780	669					1164	699					1015	734
	1814				34	660					901	564					525	673					121	550					809	755					790	669					392	700					1034	734
	1815				520	661					1013	566					1154	674					354	550					901	754					812	668					452	700					363	736
	1816				529	661					298	566					104	674					670	550					924	755					1190	670					1016	700					399	736
	1817				611	660					376	566					316	674					846	549					1127	754					166	670					292	701					542	736
	1818				654	661					420	568					6	676					1206	550					512	756					485	670					420	702					653	736
	1819				790	661					436	567					87	676					764	551					955	756					1092	671					650	701					876	736
	1820				802	661					442	567					823	676					1126	550					22	757					58	672					208	702					972	736
	1821				69	662					657	566					141	677					172	551					32	757					100	672					667	703					161	736
	1822				257	661					835	567					814	676					398	552					665	757					799	671					8	703					463	736
	1823				470	662					844	566					1104	676					564	552					204	758					1014	672					745	703					673	737
	1824				752	662					1023	566					57	677					757	552					1084	758					1034	672					893	703					685	736
	1825				968	661					1036	566					240	677					1060	552					49	758					258	673					1043	703					1051	736
	1826				142	663					52	568					320	678					1070	552					422	759					422	672					265	705					1103	737
	1827				379	663					141	568					415	678					74	553					505	759					956	673					880	704					115	737
	1828				957	662					211	568					586	678					127	553					537	759					1173	674					70	706					241	738
	1829				328	664					770	568					711	678					152	553					598	758					23	674					154	706					803	738
	1830				402	664					976	568					25	678					641	553					794	759					512	674					754	705					917	738
	1831				418	664					991	567					312	679					808	552					1138	759					930	674					114	706					928	738
	1832				605	664					309	569					45	681					22	554					280	760					17	674					285	706					1128	738
	1833				624	664					338	568					77	680					295	554					557	760					464	675					830	706					433	738
	1834				898	664					479	569					928	681					1049	554					660	761					587	674					889	706					605	739
	1835				1151	664					782	568					171	681					116	555					680	763					669	675					1065	706					982	740
	1836				282	666					1044	569					526	681					462	556					884	764					336	676					478	707					1003	740
	1837				354	664					326	570					591	680					860	556					936	764					950	676					1155	707					215	741
	1838				547	665					364	570					812	680					1092	555					306	766					376	677					1164	707					591	740
	1839				595	665					502	570					1067	680					176	557					551	766					394	677					259	708					598	740
	1840				675	665					631	570					147	681					189	556					641	766					1154	678					342	708					648	741
	1841				917	665					408	571					292	682					426	557					1079	766					177	678					294	709					175	742
	1842				1090	665					862	571					623	681					816	557					326	767					101	679					554	709					293	742
	1843				20	666					1091	570					862	682					959	556					397	768					305	679					645	709					990	742
	1844				505	666					150	572					1138	682					30	558					599	768					443	678					190	710					1044	743
	1845				559	666					870	572					205	682					1002	557					196	769					534	679					959	710					1077	743
	1846				1100	666					1038	572					393	682					1202	560					466	769					699	678					976	710					1134	742
	1847				1114	666					1080	572					439	683					268	559					667	768					1015	678					995	710					64	744
	1848				320	666					73	573					1042	684					431	559					675	769					510	680					1082	710					1025	744
	1849				936	666					133	572					297	683					482	558					954	769					1092	680					11	711					39	745
	1850				1168	667					203	572					490	683					1099	558					1148	769					1114	680					137	712					162	745
	1851				309	668					258	573					975	684					400	559					824	770					238	681					602	711					504	745
	1852				411	668					786	572					409	684					168	561					477	771					474	681					986	711					557	746
	1853				1156	668					964	573					95	685					253	561					799	770					725	680					1160	711					979	747
	1854				489	669					1016	572					1000	686					296	561					570	772					1028	681					164	711					56	748
	1855				977	668					38	574					28	688					369	560					641	772					1130	680					539	712					139	748
	1856				37	670					163	573					159	687					445	561					592	773					36	682					574	712					601	748
	1857				138	670					438	574					264	688					507	561					940	774					568	682					116	713					832	748
	1858				144	670					769	574					628	688					608	561					1154	774					95	682					130	713					852	748
	1859				538	670					1024	574					44	690					650	561					29	774					554	683					418	713					912	748
	1860				625	670					1108	574					117	689					361	562					111	774					778	683					1172	712					1100	748
	1861				818	670					244	575					649	691					665	562					124	775					905	683					232	714					79	748
	1862				866	670					389	574					830	688					722	562					338	775					928	684					477	714					595	748
	1863				1056	670					514	575					211	689					853	562					1034	776					1104	683					519	714					799	749
	1864				24	671					594	574					1059	690					909	562					722	776					451	684					823	714					808	748
	1865				190	671					749	575					1134	690					806	563					879	776					828	684					1054	714					50	750
	1866				243	670					888	575					169	692					847	563					563	777					230	685					316	716					884	750
	1867				266	670					897	575					583	690					1062	563					600	777					380	685					612	715					37	750
	1868				314	671					958	574					589	691					1151	562					680	777					334	686					754	715					242	751
	1869				461	671					1100	574					846	691					19	563					704	777					1000	686					867	715					921	750
	1870				594	671					599	577					923	690					32	564					802	777					392	687					886	715					732	753
	1871				1143	670					776	576					15	691					790	564					827	776					730	687					1068	715					962	753
	1872				1124	672					1184	575					995	692					923	564					838	776					871	686					340	716					550	754
	1873				71	673					142	577					564	692					995	563					868	777					1013	687					730	717					805	754
	1874				226	673					375	577					727	692					1105	566					191	778					344	688					740	717					812	754
	1875				300	673					484	577					855	692					47	565					988	778					586	688					941	717					827	754
	1876				477	672					615	576					1120	693					144	565					324	779					597	688					214	718					976	754
	1877				648	672					276	578					1196	693					308	565					640	779					81	688					710	718					175	755
	1878				774	673					573	578					266	694					59	566					885	778					132	689					132	719					396	754
	1879				887	673					724	578					439	694					881	565					395	780					220	689					466	719					544	754
	1880				938	673					936	578					483	693					959	566					656	780					500	689					921	718					640	755
	1881				6	674					32	578					686	694					1096	566					710	780					1091	690					988	719					927	754
	1882				497	674					90	578					32	694					1190	566					435	781					1126	689					649	720					237	756
	1883				971	674					201	579					229	694					89	567					454	781					908	690					828	720					454	756
	1884				1020	674					252	580					285	694					1115	567					488	780					654	691					926	720					609	756
	1885				200	675					341	580					864	694					73	568					591	780					825	691					966	720					900	756
	1886				274	675					740	579					1170	694					166	568					950	780					880	690					248	721					1161	756
	1887				347	675					784	579					1183	694					268	568					34	781					353	692					774	721					360	757
	1888				445	675					1084	578					527	696					497	568					219	782					438	693					872	721					648	757
	1889				684	675					1164	578					454	698					986	568					282	782					758	693					364	722					660	757
	1890				473	676					299	580					892	696					992	568					244	783					1084	693					125	723					682	758
	1891				559	676					700	579					1013	696					1027	568					600	783					150	694					562	723					874	758
	1892				641	676					795	579					1192	696					220	569					114	784					844	694					734	723					1047	758
	1893				1052	677					208	581					28	697					567	568					336	784					969	694					290	724					1096	758
	1894				188	678					213	581					716	698					614	569					411	784					1106	694					1167	724					1171	758
	1895				309	678					363	581					302	698					520	570					663	784					74	696					634	725					722	759
	1896				58	679					714	581					422	699					602	570					766	784					371	695					1054	725					750	758
	1897				283	679					172	582					621	699					777	570					1021	784					747	695					1175	724					1183	758
	1898				940	679					194	582					723	698					1151	570					291	787					766	694					236	726					228	760
	1899				228	680					581	582					835	698					42	571					396	787					858	695					1014	726					384	760
	1900				271	680					656	582					52	699					108	571					119	788					138	696					814	726					448	760
	1901				300	680					665	582					680	700					726	571					472	788					555	695					50	728					993	761
	1902				902	681					1189	581					478	700					1036	571					823	788					713	696					422	728					393	762
	1903				1040	681					61	583					576	700					1053	570					1095	788					1061	696					600	728					427	762
	1904				736	682					333	584					436	701					1196	571					178	789					1174	696					76	729					557	762
	1905				774	682					920	582					396	703					92	572					198	789					284	696					126	729					1156	762
	1906				955	681					176	584					112	704					764	572					339	789					974	697					169	729					166	762
	1907				203	682					282	584					283	704					873	571					695	789					233	698					264	729					585	763
	1908				265	682					690	584					159	705					376	573					1044	788					82	699					274	729					1037	764
	1909				872	683					1024	584					567	704					1060	573					147	790					213	699					648	729					1068	764
	1910				1068	683					1128	584					1008	704					176	574					229	790					366	699					1019	729					44	765
	1911				17	684					1170	584					1063	705					938	574					440	791					692	699					1179	728					240	765
	1912				321	684					359	585					1081	704					1184	574					498	791					950	701					182	730					345	764
	1913				333	684					589	584					234	707					118	575					732	790					1102	700					206	730					950	764
	1914				546	684					627	585					296	705					160	575					805	791					654	701					328	730					958	764
	1915				636	684					1054	585					748	706					188	574					258	792					1074	701					428	730					1104	765
	1916				240	685					181	585					812	706					773	574					81	792					436	702					436	731					660	766
	1917				390	685					446	586					838	706					994	575					301	793					469	703					777	731					676	766
	1918				568	685					847	586					252	707					1098	575					347	793					707	703					476	732					404	766
	1919				962	685					978	586					818	708					144	576					492	793					812	703					392	734					548	767
	1920				126	686					1181	586					366	711					210	576					1020	793					768	704					619	733					651	767
	1921				468	686					138	587					388	710					296	576					251	794					791	704					710	734					1061	767
	1922				668	686					144	587					457	710					846	576					419	794					1016	704					1054	734					161	768
	1923				820	686					371	587					664	709					884	576					534	795					332	705					663	734					186	768
	1924				890	686					435	586					106	711					488	577					553	795					486	705					766	734					422	768
	1925				907	686					464	587					794	711					721	577					742	795					719	704					1066	734					719	768
	1926				1049	686					563	587					1034	712					983	576					758	795					872	705					1159	734					608	769
	1927				264	687					700	587					53	712					1211	577					192	796					934	705					20	735					693	768
	1928				280	687					829	587					316	713					494	578					728	796					85	705					734	735					800	769
	1929				736	687					907	586					470	713					522	578					936	795					174	706					744	735					1142	768
	1930				1195	687					171	588					504	714					1203	578					1166	796					559	705					969	735					1148	768
	1931				211	688					882	588					839	714					29	579					408	797					922	706					264	737					1157	769
	1932				728	688					1026	588					98	714					131	579					1080	797					122	706					144	738					196	770
	1933				203	688					390	589					177	715					325	579					184	798					166	708					406	740					326	770
	1934				615	688					500	588					435	715					412	579					781	798					304	707					324	739					621	770
	1935				1028	689					592	588					978	716					702	578					821	798					606	706					332	740					1187	770
	1936				352	690					1169	588					60	716					58	580					950	798					672	707					441	739					352	771
	1937				361	690					1192	588					384	716					152	580					1175	798					226	708					480	739					534	770
	1938				47	691					250	590					443	717					275	579					258	799					281	708					618	740					581	771
	1939				532	691					554	591					898	716					336	579					336	799					513	708					639	739					859	770
	1940				567	691					746	591					1104	717					770	580					1043	800					1025	708					699	740					1112	770
	1941				1142	691					965	591					416	718					964	580					62	800					1204	709					109	740					217	772
	1942				36	692					1104	591					576	718					452	581					137	800					597	710					216	740					342	772
	1943				287	691					270	592					1166	718					802	580					216	800					208	711					288	740					503	772
	1944				545	692					296	592					161	719					38	582					304	800					390	711					654	740					567	772
	1945				750	692					410	592					367	718					696	582					429	800					653	710					677	740					776	772
	1946				944	692					690	591					510	718					1184	581					524	801					376	712					739	740					905	772
	1947				1063	692					810	591					966	718					174	582					696	801					646	712					912	740					1052	772
	1948				295	692					972	592					877	720					307	582					900	801					688	712					966	740					296	773
	1949				386	693					74	592					1179	720					315	582					173	802					18	714					56	740					180	774
	1950				594	692					111	593					215	721					593	583					646	802					60	714					160	740					898	774
	1951				680	692					239	593					678	721					663	582					969	801					121	714					558	742					40	775
	1952				902	693					302	593					897	722					672	583					250	804					204	714					568	742					367	774
	1953				1195	693					387	593					914	720					918	583					206	807					263	714					1186	742					483	775
	1954				263	694					577	593					1079	721					1040	582					362	805					331	713					342	743					730	775
	1955				702	694					286	594					1110	722					1171	582					292	806					421	714					961	743					749	774
	1956				814	694					898	594					147	723					73	583					400	806					1105	714					991	743					865	774
	1957				63	696					1025	594					572	721					301	583					766	806					326	715					142	744					990	774
	1958				327	695					1113	594					663	721					389	584					388	806					1016	714					243	744					26	776
	1959				982	694					245	595					220	723					721	584					620	807					284	716					713	744					405	776
	1960				1114	695					320	595					775	722					825	584					608	808					450	716					1074	744					1164	776
	1961				1162	694					462	595					862	723					838	584					783	808					765	716					396	745					1143	777
	1962				104	695					734	595					1131	723					1096	584					696	809					800	716					695	745					302	778
	1963				363	696					910	594					92	724					871	585					930	809					311	717					1121	745					723	778
	1964				621	695					592	596					183	724					932	585					728	810					375	717					1156	745					767	778
	1965				733	696					721	596					792	724					1075	584					807	810					546	717					1176	745					819	778
	1966				926	696					1047	597					932	724					1088	585					1092	810					682	718					614	746					1119	778
	1967				1084	696					1062	596					1163	724					31	586					60	810					752	718					768	746					1154	778
	1968				1202	696					1139	596					866	725					224	585					220	810					1185	718					122	747					206	780
	1969				129	697					1202	596					1034	724					260	586					403	811					32	719					474	747					775	780
	1970				802	697					512	598					208	725					397	586					519	811					425	719					632	747					851	780
	1971				917	697					885	598					1054	726					491	585					738	811					895	719					932	747					948	780
	1972				1028	697					893	598					1103	726					786	586					857	811					435	720					1118	747					383	780
	1973				24	698					1115	599					165	727					809	586					872	810					644	720					30	748					461	780
	1974				602	698					1206	598					173	726					1154	586					189	812					648	720					460	748					503	781
	1975				1089	698					240	600					178	726					184	587					428	813					857	720					304	749					579	781
	1976				346	698					962	600					709	726					326	587					210	814					1006	721					464	750					589	781
	1977				450	699					1123	600					1074	727					528	586					570	814					1171	720					677	750					907	780
	1978				393	700					1129	600					1174	726					731	587					708	814					1190	721					950	750					166	782
	1979				955	700					368	602					221	728					965	586					766	814					108	722					276	751					498	781
	1980				1120	700					669	601					275	727					447	587					808	814					143	721					659	752					699	782
	1981				76	701					1072	601					921	728					613	588					465	815					484	722					772	751					986	782
	1982				139	700					1134	601					83	729					754	587					473	814					717	722					902	751					71	782
	1983				227	700					1196	600					214	728					882	589					500	815					1140	722					1132	751					830	783
	1984				262	701					298	602					337	729					226	590					692	815					280	722					371	752					893	782
	1985				818	701					524	602					367	729					338	590					852	815					563	722					566	752					284	784
	1986				970	701					754	602					597	728					704	590					310	816					824	723					451	753					376	784
	1987				1127	700					1000	602					1106	729					696	592					901	816					927	722					516	754					814	784
	1988				299	702					145	602					1123	728					798	591					414	817					160	724					893	752					921	784
	1989				340	701					569	602					456	730					916	591					801	817					776	724					256	754					965	784
	1990				658	702					658	603					769	730					74	592					820	817					60	726					362	754					96	784
	1991				1110	701					677	603					13	730					189	592					870	816					547	726					710	754					154	784
	1992				96	703					1079	602					409	732					682	591					1029	817					917	726					1029	754					228	785
[truncated: 10,349 more rows]

## Sheet: Source Fig4-fig suppl1
	Nadal-Nicolas et al., eLife 2020
	Source data Figure 4-figure supplement 1. Visual field of S-opsin expression vs. True S-cones.
	Strain	Pigmented mice (C57BL6)							Package for retina and Visual space retistruct
	Sub-type	S-opsin			True S-Cones				can be found in
	#	1 (column A)			1 (column C)
	Total cells/retina	106702			20951				Sterratt DC et al., PLoS Comput Biol 9(2):e1002921
	Cell x,y coordinates	x	y		x	y			PMID: 23468609
	1	4878.79	338.5		4870	446
	2	4903	360.5		5048	478
	3	5053.5	418.214		4824	633
	4	4870.94	447.611		5247	642
	5	5080	452		4888	646
	6	5047.38	476.238		5212	655
	7	4721.58	551.115		4760	677
	8	5180.21	562.929		4968	683
	9	4882	584.5		4916	729
	10	5000.5	590		4640	740
	11	5162.5	610.5		5068	747
	12	5092.71	621.692		5025	757
	13	4829.5	629		1678	764
	14	4823.62	632.5		4712	801
	15	4678.17	639.167		1790	822
	16	5247	641		4704	829
	17	4689.7	643.9		4705	842
	18	4885.01	647.679		1992	848
	19	4681.5	652.5		1998	857
	20	5215	656.5		4822	871
	21	4667	658.5		5512	882
	22	4958.33	664.222		4808	883
	23	4760.95	678.409		5142	901
	24	4973.27	685.542		1796	906
	25	4732.42	695.417		1817	906
	26	4806.83	706.833		4661	914
	27	5289.33	708.833		5022	948
	28	4660.93	718.662		4760	959
	29	4917.6	728.976		4770	970
	30	4926.06	729.778		4536	983
	31	4641.5	739.433		4784	983
	32	5067.73	748.324		4602	987
	33	5338.5	747		4889	994
	34	1819.5	748		5454	996
	35	5240.5	751		4608	1000
	36	5023.86	756.189		4532	1009
	37	1678.5	760.5		1958	1012
	38	1708	775		5152	1014
	39	1871.85	788.912		2062	1022
	40	4601.55	793.136		2068	1028
	41	4859.5	791		4769	1031
	42	1863.7	791.9		4976	1032
	43	4708.19	801.722		5402	1045
	44	1861	800.5		4638	1051
	45	4607.43	802.643		1901	1052
	46	1908.33	817.667		4666	1056
	47	4704	829.667		2026	1060
	48	1776	828		4591	1064
	49	1926	828		2025	1068
	50	4755.1	838.5		4440	1074
	51	4966.5	839.053		4576	1080
	52	4703.85	840.2		5130	1086
	53	4619	843		4559	1104
	54	1986.64	849.071		4541	1107
	55	1991.5	848.5		5380	1110
	56	1996.29	854.714		4659	1114
	57	2002.17	856.389		5725	1121
	58	4820.89	868.891		1878	1125
	59	5416.5	868		2078	1136
	60	4826.4	876.887		4780	1137
	61	4808.92	882.538		5513	1137
	62	5511.8	880.3		5412	1139
	63	2092.72	895.611		4782	1142
	64	5140.94	901.922		4470	1145
	65	1794.22	905.111		5352	1145
	66	1816	905		4714	1148
	67	2050.5	904.214		2256	1151
	68	5017.81	909.269		4529	1158
	69	4662.3	911.6		4822	1159
	70	2108	912.5		2264	1164
	71	4681	913.5		4816	1167
	72	4568.1	916.3		4554	1196
	73	4656.07	917.5		2148	1197
	74	4856.5	918.5		1996	1201
	75	4664.5	920		4644	1202
	76	4683	918.5		5592	1203
	77	4682	922		4574	1208
	78	1697	926		2322	1209
	79	5569.3	938.5		1762	1218
	80	4981.41	942.5		1940	1219
	81	5024.99	949.013		4580	1220
	82	2135.83	945.389		2398	1224
	83	1664	945.5		4460	1225
	84	4755.67	946.667		4476	1235
	85	2141	947		4754	1237
	86	2051.59	951.548		1591	1240
	87	2067.76	951.984		5381	1244
	88	5178	949		2252	1249
	89	1603.67	950.5		4372	1253
	90	4759.47	958.864		4506	1263
	91	4468.33	961.667		4373	1270
	92	5009.57	969.534		5202	1273
	93	4764.5	969.5		4673	1274
	94	1571.5	971		4940	1275
	95	4775.1	976.167		2286	1277
	96	4766	975.5		4514	1280
	97	4533.12	981.086		4408	1283
	98	4780.14	983.409		1864	1289
	99	4785.45	985.395		5420	1292
	100	5001.21	985.265		2376	1295
	101	4507.05	990.474		2246	1296
	102	4599.79	986.262		4523	1298
	103	1767.93	989.929		5347	1309
	104	4886.86	993.909		4406	1312
	105	4603.19	997.125		5592	1314
	106	5450.82	1000.05		5078	1315
	107	4753.57	999.714		1912	1318
	108	1958.5	1008		2247	1318
	109	4531.77	1008.3		5608	1319
	110	4457	1008		4889	1325
	111	5150.91	1011.98		4339	1326
	112	4708.17	1020.42		5592	1328
	113	4503	1021		5788	1331
	114	2061.89	1023.61		4724	1334
	115	4538	1024.5		4381	1334
	116	2067	1029		4405	1336
	117	4975.79	1033		4713	1340
	118	5201.5	1030.5		4740	1349
	119	4771.11	1032.5		5393	1350
	120	4980	1036		2097	1354
	121	4774.36	1042.14		4479	1354
	122	4762.81	1044.62		1502	1356
	123	5403.79	1045.1		5500	1356
	124	4637.5	1051.12		4948	1374
	125	5104.9	1052.3		1480	1375
	126	4667.04	1055.25		2310	1379
	127	2165.6	1055.55		2224	1382
	128	1899	1055		2186	1384
	129	2026.5	1058.5		4953	1387
	130	4512.5	1057		4874	1393
	131	5049.14	1064.11		4468	1395
	132	4645.42	1060.58		2286	1396
	133	4687.03	1065.97		4864	1400
	134	2024.91	1065.62		4310	1403
	135	1948.59	1066.14		4443	1403
	136	4590.83	1066.83		2513	1405
	137	2223.68	1069.95		1502	1406
	138	4673.1	1072.03		4856	1406
	139	5046.5	1072		2278	1407
	140	5050.1	1073.7		5822	1410
	141	4572.75	1076.12		1526	1411
	142	5123	1075.5		4407	1413
	143	4444.86	1080.07		2628	1415
	144	4597	1078.5		5186	1416
	145	4727	1083		5076	1423
	146	5134.59	1086.89		4711	1426
	147	1795.34	1088.62		4664	1428
	148	4577.67	1086.5		2644	1430
	149	1939.67	1090.33		4714	1433
	150	4732.93	1091.79		2160	1434
	151	4448	1095		4639	1436
	152	5728.5	1097.79		1948	1438
	153	4556.57	1099.3		1304	1440
	154	4538.98	1103.83		4428	1440
	155	4560.5	1106		4437	1440
	156	1841.7	1109.85		4417	1448
	157	5383.5	1110.79		4540	1450
	158	4546.67	1112.67		5467	1449
	159	4661	1115.61		4557	1451
	160	4542.17	1114.5		2527	1466
	161	4442.89	1117.04		4879	1467
	162	2331.77	1124.77		4484	1471
	163	4754	1120.5		4567	1472
	164	5231.7	1120.5		2533	1472
	165	5722.5	1120.5		5417	1472
	166	1880.5	1124.5		4447	1474
	167	2231	1122		4598	1476
	168	4576.35	1124.88		1374	1477
	169	4737	1122.5		4791	1476
	170	5044.73	1124.85		4304	1479
	171	5092.38	1125.73		1366	1480
	172	4757.83	1129.17		4395	1480
	173	2078.79	1133.73		4475	1481
	174	5412.93	1137.75		2526	1488
	175	4780.25	1135.67		4531	1490
	176	2261.17	1135.83		1740	1490
	177	5511.46	1136.87		4457	1498
	178	5352.34	1138.24		1756	1512
	179	4468.56	1143.39		2357	1512
	180	5068.1	1141.7		4569	1512
	181	4783.63	1144.2		4643	1516
	182	4714.75	1146.6		1757	1518
	183	5351.33	1144.67		2326	1518
	184	5278.96	1147.38		4384	1522
	185	2360	1149.5		4548	1522
	186	4660.67	1149.67		4374	1523
	187	4615.65	1152.19		2698	1525
	188	2257	1152.5		5486	1528
	189	4527.39	1153.72		2792	1535
	190	4823.63	1160.24		4427	1537
	191	4620.5	1158.93		2155	1539
	192	4722.35	1160.57		4283	1544
	193	2350.5	1159.5		5326	1545
	194	2261.38	1162.62		2620	1546
	195	4816.18	1165.95		2802	1548
	196	5781.78	1168.11		2095	1552
	197	4838.29	1174.47		2542	1552
	198	5006.89	1174.27		1722	1553
	199	4468	1174		2443	1554
	200	4536.94	1180.28		4834	1556
	201	5001.5	1180		2142	1558
	202	4566.83	1182.83		2806	1560
	203	2148.74	1194.42		2545	1561
	204	1880.38	1192.75		4284	1562
	205	4557.85	1194.91		2444	1565
	206	1998	1199		4848	1565
	207	4614.73	1200.04		4566	1570
	208	5026.34	1199.34		4588	1570
	209	5667.75	1198.5		4286	1572
	210	5591.11	1203.71		5162	1576
	211	4745.36	1200.93		5064	1577
	212	5039	1201.75		4587	1580
	213	5083.42	1205.98		2230	1590
	214	4564	1205.5		4510	1590
	215	2320.73	1208.85		4434	1591
	216	4576.34	1208.7		2150	1592
	217	4300.17	1206.83		4254	1592
	218	4337.83	1206.83		2527	1594
	219	4620	1207.5		2575	1595
	220	4746	1207.5		2078	1598
	221	1759.94	1218.44		4425	1598
	222	1936.01	1219.68		4754	1600
	223	1443.18	1218.66		4252	1603
	224	2399.98	1225.2		4698	1604
	225	4583.07	1221.36		5512	1605
	226	4873	1223		2088	1606
	227	4466.8	1224.4		2079	1607
	228	4756.79	1226.36		4332	1608
	229	4848.5	1229		4737	1608
	230	2226.21	1229.93		4682	1609
	231	4866	1231.5		2264	1612
	232	4477.4	1234.5		2820	1615
	233	4876.5	1233.5		4686	1616
	234	4754	1236		2788	1620
	235	5382.38	1236.56		2854	1621
	236	4845	1236.5		2848	1624
	237	1596.93	1242.16		1887	1625
	238	5379.5	1242.14		4283	1625
	239	4413.27	1248		2791	1628
	240	5445.22	1248.6		4708	1635
	241	2254.45	1249.82		4738	1635
	242	4371.04	1252.04		4724	1642
	243	4530.29	1252.14		4740	1643
	244	4874.9	1253.3		5041	1643
	245	1727.5	1252		1464	1644
	246	4910.17	1252.17		1949	1643
	247	2503.71	1255.86		4616	1646
	248	4485.61	1255.83		4586	1648
	249	4700.57	1256.9		2442	1650
	250	4259.5	1257.5		4540	1650
	251	5156.57	1259.5		4653	1651
	252	4355.33	1263.02		5123	1652
	253	4472.5	1259.7		5076	1655
	254	4507.39	1262.12		2348	1656
	255	4535.83	1261.83		4275	1656
	256	4792.86	1266.5		4750	1656
	257	4703	1265.5		2295	1657
	258	4372.61	1267.28		2686	1658
	259	4503.68	1271.23		4299	1658
	260	4839.3	1271.3		4645	1658
	261	5199.07	1273.29		5025	1659
	262	4515.3	1275.25		5043	1660
	263	4672.25	1274		4607	1662
	264	2286.5	1276		2040	1663
	265	4941.98	1277.12		4902	1664
	266	4952.12	1277.5		2690	1666
	267	4835	1278.5		2768	1666
	268	4407.14	1281.07		4299	1668
	269	4805.14	1281.07		5234	1669
	270	4896.5	1280		4664	1670
	271	4529.44	1282.67		2626	1674
	272	4869.31	1285.27		2777	1674
	273	1861.73	1288.07		2904	1680
	274	4378.5	1282.7		4715	1680
	275	4674	1281.5		2914	1680
	276	4886.91	1284.86		4568	1682
	277	4510	1286.5		1380	1683
	278	4805.33	1287.67		4601	1682
	279	4923.7	1287.3		2634	1686
	280	4533.79	1292.33		2924	1685
	281	5274.97	1290.43		4664	1687
	282	5423.05	1291.19		2720	1688
	283	2377.01	1295.7		4575	1688
	284	4438	1290.5		4686	1688
	285	2247.19	1294.85		4622	1688
	286	5935.5	1294		2311	1690
	287	4362.57	1298.14		2687	1694
	288	4408.5	1298.5		2340	1696
	289	4527.5	1300.5		2710	1698
	290	1688.5	1301		4376	1701
	291	4902.97	1302.63		4508	1701
	292	4391.29	1307.5		2295	1703
	293	4407.17	1309		1174	1704
	294	4531.83	1306.17		4364	1704
	295	4892.97	1308.1		4603	1709
	296	5349.16	1310.03		4175	1714
	297	4609.81	1311.12		2792	1717
	298	1384.17	1309.17		4525	1716
	299	2200	1309		2237	1718
	300	2248.11	1314.45		4472	1719
	301	4773.23	1314.9		2550	1722
	302	5078.08	1314.03		5025	1723
	303	5593.67	1314.42		4176	1724
	304	1911.71	1320.79		4650	1725
	305	4451.89	1317.04		4464	1726
	306	4443	1315.5		2729	1728
	307	5610.05	1321.07		4503	1730
	308	5344.83	1317.17		2553	1732
	309	5595.67	1318.67		4780	1733
	310	1908	1319.5		1649	1734
	311	5740.87	1322.97		2454	1734
	312	4340	1324		2907	1734
	313	4667.5	1326.5		5839	1737
	314	5593.21	1326.85		5989	1742
	315	4888.35	1327.6		1069	1744
	316	4726.53	1332.65		1846	1745
	317	5614	1326.5		2386	1758
	318	4364.1	1328.3		2600	1759
	319	5064.25	1328.75		2181	1760
	320	4881.1	1330.3		2119	1769
	321	5786.23	1333.55		1549	1771
	322	4405	1333.5		5386	1771
	323	4873	1333.5		1122	1773
	324	1959.92	1336.97		4644	1774
	325	4380.1	1335.3		4967	1774
	326	4667.39	1336.17		5384	1775
	327	4606.75	1339.12		2288	1779
	328	4715	1340.79		1818	1780
	329	4490.17	1343.33		5402	1780
	330	1951.85	1344.83		4959	1782
	331	4371	1344.5		2326	1784
	332	2343.5	1346		1953	1785
	333	4609	1347		1169	1788
	334	5394.76	1347.34		6208	1788
	335	2363.73	1349.27		5782	1792
	336	4746.5	1350.79		5441	1796
	337	2098.38	1355.02		2490	1800
	338	5656.83	1351.83		1406	1805
	339	5906.76	1354.37		2685	1804
	340	4456	1354.5		4788	1807
	341	5501.04	1356.8		1824	1808
	342	1503.61	1355.83		5183	1814
	343	5047	1355		2304	1820
	344	4563.1	1357.3		5184	1821
	345	4983.93	1358.86		2482	1822
	346	5008.31	1360.56		2475	1830
	347	4441.94	1362.17		3014	1830
	348	4983.89	1363.58		1867	1832
	349	4903.89	1364.27		5548	1832
	350	2027.38	1368.54		6127	1836
	351	5405.11	1368.12		1872	1844
	352	5067	1367.5		2964	1844
	353	2233.58	1371.19		6089	1849
	354	4807.56	1370.56		1397	1850
	355	4837.09	1372.77		1955	1850
	356	4356.5	1373.3		4876	1852
	357	1478.58	1374.33		5570	1852
	358	4301.81	1377.78		4740	1853
	359	5397.12	1374.4		1963	1857
	360	4708.61	1374.61		3012	1857
	361	4392.91	1380.19		1943	1862
	362	2227.12	1380.12		4433	1864
	363	4424.11	1380.12		6231	1864
	364	4952.24	1379.18		3020	1865
	365	2571.85	1380.68		6021	1867
	366	4747.5	1382		4301	1868
	367	2188.7	1382.9		2502	1875
	368	2308.19	1384		4964	1875
	369	2417.5	1383.21		1663	1879
	370	4605.68	1384.41		4850	1879
	371	4309	1383.5		4436	1880
	372	2433.76	1387.76		5464	1881
	373	4953.06	1387.11		4826	1883
	374	4650.5	1390		6022	1884
	375	4817.77	1389.14		1910	1887
	376	2575.33	1389.33		4694	1886
	377	4876.05	1389.9		1356	1888
	378	4540.53	1398.12		2651	1890
	379	5200.83	1391.83		3074	1890
	380	4729.14	1394.95		4314	1890
	381	4468.5	1395		5712	1894
	382	4605.1	1394.7		1636	1896
	383	4865.5	1395.38		4092	1896
	384	2219.06	1396.28		2729	1897
	385	4638.07	1396.21		4575	1898
	386	2281.71	1396.79		3024	1903
	387	4578	1397		5364	1904
	388	2297.75	1400.38		3020	1911
	389	4309.04	1403.35		3033	1912
	390	4725.33	1402.67		2653	1913
	391	4737	1403.12		2406	1914
	392	4856.54	1404.06		4248	1916
	393	2276.39	1404.17		4613	1920
	394	4431	1404		5089	1920
	395	4439.83	1403.67		4092	1924
	396	5071.64	1405.36		2252	1925
	397	2511.06	1407.68		2409	1925
	398	4450.86	1407.86		4188	1924
	399	4774.42	1408.67		5514	1927
	400	2149.89	1409.35		2244	1929
	401	4577.83	1406.83		1423	1931
	402	1502	1408		5000	1937
	403	4733.83	1409.17		1524	1939
	404	2438.25	1410.88		4249	1940
	405	5824.71	1411.14		5424	1940
	406	4405.89	1412.65		2118	1943
	407	1524	1414		3030	1943
	408	2628.83	1414.39		2400	1944
	409	4319.83	1414.17		1427	1947
	410	5185.54	1416.17		3065	1953
	411	4353	1415		2666	1958
	412	4455.38	1415.38		2252	1960
	413	4523.12	1417.88		4594	1960
	414	4707.83	1414.83		1982	1969
	415	4942.5	1417		2616	1969
	416	5076.02	1421.03		5479	1970
	417	4404.8	1421.4		2252	1973
	418	4426.67	1419.5		2776	1973
	419	4710.97	1424.33		4708	1976
	420	4736	1421		5393	1976
	421	4417.79	1422.79		4604	1978
	422	2641.19	1425.35		6228	1978
	423	4514.5	1424.5		1980	1979
	424	5098.71	1426.93		4524	1979
	425	4663.5	1426.25		2355	1980
	426	4714.82	1430.45		4339	1980
	427	5076.1	1427.7		4412	1987
	428	4643.97	1434.06		5473	1990
	429	2160.82	1433.12		2710	1993
	430	4295	1431.5		2099	1994
	431	1948.59	1437.67		2659	1996
	432	4524.64	1431.21		2990	1996
	433	4313	1434		2957	1997
	434	4409.5	1434.1		5122	2000
	435	1303	1438.5		4370	2004
	436	1844.45	1441.07		2098	2004
	437	4851.56	1438.38		2662	2005
	438	4428.69	1443.23		5879	2006
	439	4440.44	1442.56		5665	2008
	440	4841.17	1441.17		1904	2009
	441	4289.2	1444		6234	2009
	442	4415.58	1443.42		2962	2013
	443	4536.83	1446.5		5105	2013
	444	4465	1443		5090	2014
	445	4323	1445		4327	2015
	446	4752	1444		1662	2018
	447	2241.5	1445.96		6321	2018
	448	4381	1447		3174	2019
	449	2233.5	1447		1371	2022
	450	5016.5	1446.83		2824	2023
	451	4559.08	1452.24		4823	2022
	452	5466.84	1454.36		3991	2023
	453	5121	1450.5		5265	2024
	454	2582.33	1453.33		5430	2024
	455	4391.59	1458.28		1184	2027
	456	4753.79	1453.5		2335	2029
	457	2445.39	1455.83		4810	2033
	458	5188.86	1455.95		4213	2040
	459	4239.33	1456.33		5946	2040
	460	4810	1455.5		2329	2042
	461	2495.9	1457.7		4042	2046
	462	4605.25	1458.67		6067	2049
	463	4553.83	1460.83		5317	2055
	464	2042.2	1462.13		6055	2054
	465	4318.29	1465.94		2064	2058
	466	4435.5	1461		4995	2060
	467	4598.67	1462.76		4329	2061
	468	4717.5	1461.32		4820	2066
	469	2443.5	1460		4838	2066
	470	4805.33	1463.39		4167	2068
	471	4444.5	1463.5		4191	2068
	472	2159.3	1462.9		4175	2070
	473	2527.95	1465.5		4192	2076
	474	4379	1462.5		2814	2077
	475	2587.5	1464.5		1364	2079
	476	4431.75	1465.5		4779	2079
	477	4233	1466		2598	2081
	478	4798.5	1467.81		5138	2081
	479	4880.31	1468.77		5492	2083
	480	5417.09	1472.2		4384	2084
	481	5397.75	1468.5		1371	2085
	482	4424.67	1469.33		2580	2087
	483	2531.5	1471.5		4480	2087
	484	4447	1472.5		1562	2088
	485	4568.44	1472.44		4790	2089
	486	4856.68	1470.97		2916	2092
	487	1351	1470.5		1697	2094
	488	4438.5	1471.5		1267	2097
	489	4598.5	1474.54		2248	2098
	490	2428.14	1476.71		5498	2099
	491	5960.89	1477.15		1415	2100
	492	4794.5	1477		1522	2100
	493	4304.62	1481.7		1593	2101
	494	4368.58	1480.19		5362	2101
	495	1376.5	1479		1285	2102
	496	2736.5	1480.5		4784	2104
	497	4788.5	1479		2798	2106
	498	1365.25	1480.5		4777	2106
	499	4562.67	1481.33		2751	2107
	500	2728.74	1488.12		6082	2108
	501	4393.5	1484.5		2518	2110
	502	4449	1483		1990	2115
	503	4833.11	1482.73		2378	2115
	504	1976.22	1486.22		4296	2118
	505	4646	1486		2697	2124
	506	4786	1483.5		4314	2124
	507	2527.61	1486.06		2755	2125
	508	4529.31	1488.19		2290	2129
	509	1738.19	1488.01		2596	2129
	510	4700.5	1487		5054	2129
	511	4525	1489		2767	2129
	512	4695	1491.5		3220	2130
	513	4304.5	1492.75		3021	2133
	514	4526.26	1496.02		1194	2134
	515	4597	1495.5		2723	2134
	516	2628.5	1495.5		943	2136
	517	2769.56	1503.56		2789	2138
	518	4371	1499.5		2704	2140
	519	4644.5	1499		2152	2141
	520	2633.5	1500.5		1403	2142
	521	2715.67	1500.5		2952	2143
	522	1908.5	1504		3043	2143
	523	1840.57	1504.79		4970	2143
	524	2361.56	1505.22		1432	2144
	525	4395	1502.5		2336	2150
	526	4640.83	1502.83		5540	2150
	527	1512.33	1505.67		3967	2154
	528	2776	1505		1169	2155
	529	1521.5	1506		1706	2155
	530	1508.83	1508.83		3166	2162
	531	2508	1509		1532	2166
	532	4641.94	1516.06		1904	2167
	533	4681.62	1512.31		2407	2167
	534	1746	1510.5		2796	2168
	535	1753.66	1513.66		4461	2167
	536	1928.5	1513		5806	2168
	537	2357.42	1512.67		4741	2175
	538	4566.58	1513.96		793	2176
	539	4581	1513.12		4050	2177
	540	4590.5	1512.75		4590	2177
	541	2728.7	1512.9		2793	2178
	542	1986	1515		5863	2181
	543	4537.2	1523.47		3224	2182
	544	6100	1514.5		2379	2183
	545	4675.5	1516.17		4664	2184
	546	2323.15	1518.54		2016	2185
	547	1430	1518		5424	2188
	548	1763.5	1519.5		2556	2192
	549	1967	1519		2462	2193
	550	4372	1521.5		4371	2192
	551	1769.5	1520		2848	2194
	552	4382.81	1522.75		3074	2194
	553	4550.65	1524.32		4191	2194
	554	4815.35	1521.88		1729	2196
	555	2703.57	1527.28		2816	2196
	556	5488.27	1527.45		4776	2196
	557	2159.26	1523.54		4547	2200
	558	4574.75	1524		2959	2202
	559	2148.78	1524.42		3948	2202
	560	4288.24	1526.71		4113	2202
	561	4312	1524		2626	2204
	562	2451.93	1526.29		2432	2205
	563	4593.86	1528.59		1687	2208
	564	4646.6	1528.12		927	2212
	565	4298.83	1527.17		2977	2212
	566	5732	1526.5		3225	2214
	567	1984.4	1532.1		4716	2215
	568	2099.67	1530.63		1208	2216
	569	4230.42	1532.5		1700	2216
	570	4523.17	1533		1374	2217
	571	4816.91	1531.44		2791	2216
	572	4315	1532		2252	2217
	573	4551.28	1533.61		2982	2218
	574	4763.7	1532.1		986	2220
	575	5110.5	1532.5		1214	2220
	576	2790.41	1535.31		1510	2220
	577	5505.5	1533		2238	2223
	578	2017.5	1535.33		2996	2223
	579	2494.5	1535		1463	2224
	580	4809.42	1536.83		1844	2226
	581	1841.27	1539.12		1515	2227
	582	4291.25	1538.12		2806	2228
	583	1781.17	1539.46		3245	2228
	584	4232.9	1538.7		2925	2229
	585	4425.43	1542.57		3970	2229
	586	2624.63	1544.34		1471	2232
	587	4783.37	1540.7		4717	2232
	588	1884	1540.5		5146	2232
	589	2141	1541		6018	2233
	590	5234.42	1542.42		2388	2234
	591	4520.1	1542.7		1456	2235
	592	5278.15	1546.33		2930	2236
	593	2799.5	1545.5		2258	2236
	594	4282	1543		4045	2237
	595	5106	1542.5		1471	2239
	596	5325.2	1547.93		2294	2242
	597	2295.5	1544		930	2243
	598	2770.7	1545.3		1354	2247
	599	1845.83	1545.83		4582	2247
	600	1884.83	1545.83		2461	2251
	601	4517	1547		2929	2253
	602	1873.15	1549.05		4242	2255
	603	2810	1551		3066	2256
	604	2541.95	1551.23		1370	2256
	605	2774.25	1549.5		1236	2258
	606	4653.5	1549.83		3003	2258
	607	2778.75	1552.5		1265	2260
	608	4299.6	1553.5		2953	2261
	609	4536.61	1553.72		1139	2263
	610	4649.5	1552.17		4114	2266
	611	2088.33	1553.67		1276	2268
	612	5535.86	1557.86		3073	2269
	613	1717.8	1557.82		3304	2269
	614	2095.08	1555.24		3218	2271
	615	2443.14	1556.29		2424	2276
	616	4382.94	1556.28		2736	2279
	617	4834.15	1557.65		2447	2280
	618	4371	1557		2654	2279
	619	2544.66	1558.76		5082	2285
	620	2139.75	1559.25		5092	2286
	621	2549	1558.5		2646	2287
	622	2803.05	1560.41		4168	2287
	623	2815	1558.5		2055	2291
	624	4319	1559		3183	2296
	625	4617.4	1562		4218	2297
	626	4281.69	1562.5		2361	2298
	627	2442.63	1563.85		2606	2298
	628	2523	1561.5		2053	2298
	629	4847.05	1563.9		2749	2300
	630	1144.5	1562		4998	2303
	631	4566.33	1566.83		1100	2304
	632	1438	1566		4846	2307
	633	2394.42	1567.67		4883	2308
	634	4419.77	1571.4		1104	2309
	635	4502.5	1567		2061	2310
	636	4654.5	1567		4850	2310
	637	4945.32	1568.41		5179	2311
	638	5511.32	1571.18		3964	2312
	639	2809.33	1568.33		1582	2313
	640	4302	1567.5		3325	2312
	641	4557.62	1569.25		6150	2313
	642	4621	1568		1852	2314
	643	4589.55	1571.29		3292	2318
	644	2525.17	1569.83		2210	2319
	645	2841.1	1570.3		2646	2320
	646	4563.38	1572.9		4185	2322
	647	4659.21	1573.31		2768	2324
	648	4984.42	1571.67		2841	2326
	649	4615.5	1571.6		4418	2327
	650	4648.96	1572.04		5036	2326
	651	4961.92	1576.74		5765	2329
	652	5063.06	1575.5		3973	2334
	653	2796	1572.88		1562	2335
	654	4766.5	1574.24		5556	2336
	655	4499.5	1573.5		2771	2336
	656	4550.72	1578.38		4564	2337
	657	5161	1573.5		1598	2338
	658	4285	1575		2916	2338
	659	4346.42	1578.58		1571	2338
	660	4559.68	1578.05		3056	2339
	661	2800.93	1578.79		5593	2340
	662	4587.27	1581.04		2628	2341
	663	5210.33	1581.33		2995	2340
	664	5051.9	1581.83		4875	2342
	665	4257.67	1581.5		3018	2344
	666	4972.83	1581.83		2908	2346
	667	2704.5	1582.5		4621	2346
	668	4512	1589.09		3344	2349
	669	4619.43	1586.91		3982	2351
	670	1193	1587.7		1871	2354
	671	4430.83	1589.6		2805	2355
	672	2238.62	1587.92		2814	2356
	673	2288.83	1588.6		2266	2357
	674	2712	1587		2836	2358
	675	2228.9	1589.5		4117	2358
	676	4346	1589		1979	2360
	677	2572.78	1594.25		1792	2363
	678	2527.02	1595.05		1801	2364
	679	6092.5	1590		3295	2364
	680	2152.67	1591.93		1846	2366
	681	2697.92	1592.25		2464	2366
	682	4250.23	1592.83		4277	2367
	683	4839.5	1592.96		3108	2370
	684	5463.72	1597.81		3234	2370
	685	2279.17	1593.17		4942	2371
	686	4309.27	1597.41		5316	2372
	687	1162	1595.5		1900	2373
	688	2720.38	1595.62		2659	2376
	689	2703.21	1595.93		1044	2379
	690	4748.5	1596		2932	2381
	691	4426.91	1599.5		4433	2382
	692	5513.3	1597.5		2557	2385
	693	2727.39	1598.61		1531	2386
	694	4759.71	1598.93		1499	2390
	695	2080.68	1599.62		4514	2391
	696	4248.4	1601.65		661	2392
	697	2070.02	1602.57		3322	2392
	698	4753.3	1601.77		4273	2392
	699	5510.75	1604.39		6286	2394
	700	1179.5	1602.5		1036	2395
	701	4330.26	1605.37		2368	2394
	702	4697.67	1603.75		4299	2394
	703	4619.69	1606.5		4500	2397
	704	4912	1604.5		3370	2396
	705	1175.83	1606.17		874	2398
	706	2084.14	1607.9		1934	2400
	707	4311	1607		2536	2400
	708	4691.67	1606.33		2467	2401
	709	2527.21	1608.71		2723	2404
	710	4680.5	1608.81		6237	2404
	711	4748.17	1607.17		1232	2405
	712	5030.69	1608.12		3364	2406
	713	1187.39	1608.83		1051	2406
	714	1977.5	1608		3265	2406
	715	4845	1610.29		2468	2409
	716	2253.25	1611.5		2632	2410
	717	2264.33	1611.56		2934	2411
	718	4197	1610.5		2426	2412
	719	2819.43	1613.83		2662	2412
	720	2841.94	1618.9		5211	2412
	721	4732.28	1612.39		5407	2413
	722	5025.67	1612.33		4383	2414
	723	2636	1613.5		3195	2416
	724	5562.17	1617.81		2754	2417
	725	2194.5	1614.6		2922	2419
	726	2503.5	1615		5058	2419
	727	4320	1614.5		4644	2420
	728	4686.66	1616.66		5027	2420
	729	2782.64	1618.12		2795	2420
	730	2853.84	1619.91		1466	2423
	731	2860.61	1616.94		5297	2423
	732	2415.83	1616.83		6144	2424
	733	5015.44	1618.97		1606	2425
	734	1237.5	1618		4086	2424
	735	2408.61	1618.83		1628	2430
	736	2825.64	1619.71		1372	2431
	737	4612.77	1620.83		3343	2434
	738	4664.62	1622.99		4611	2434
	739	4917.5	1621.37		4791	2434
	740	4180.89	1626.86		5471	2435
	741	4988.7	1620.1		4974	2437
	742	5994.75	1620.5		4082	2438
	743	1883.44	1623.33		2826	2438
	744	1995.32	1624.94		655	2440
	745	2865	1624		4656	2440
	746	4283.56	1625.39		6225	2441
	747	2504.5	1625		908	2441
	748	4983.5	1624.5		2578	2443
	749	1538.5	1625.77		3124	2443
	750	2791.03	1626.9		4561	2443
	751	2192.9	1626.43		2982	2446
	752	2845.96	1628.27		5308	2447
	753	2182.5	1628.83		5840	2447
	754	4909.93	1627.21		5967	2447
	755	1988	1628.62		2682	2448
	756	5229.5	1629		5464	2448
	757	4834.4	1631.87		4556	2448
	758	4709.2	1635.12		4774	2450
	759	2409	1635.5		2906	2453
	760	4737.75	1634.25		1232	2454
	761	2763.5	1634.5		574	2455
	762	4272	1635.5		2818	2455
	763	4285.68	1636.41		4500	2454
	764	5005.67	1638.42		1395	2456
	765	4510.21	1637.93		5367	2456
	766	4263.71	1642.71		2467	2458
	767	4745.3	1644.05		2827	2460
	768	4727.94	1640.94		648	2461
	769	1951.72	1643.24		2394	2463
	770	2467.83	1641.06		4187	2464
	771	2753	1640.5		5854	2464
	772	4547.6	1644.5		1182	2466
	773	4650.42	1642.81		2148	2466
	774	2404.83	1641.83		4005	2466
	775	1464.7	1645.26		580	2467
	776	4483.91	1647.25		4430	2468
	777	5037.25	1653.64		2687	2469
	778	2535.5	1645		2878	2468
	779	4554	1647.5		5525	2472
	780	4614.92	1647.67		2308	2473
	781	4258	1649.5		606	2473
	782	1822.83	1649.61		1404	2475
	783	4586	1649		2400	2475
	784	4642.5	1648.5		2992	2477
	785	2442.7	1649.8		3390	2479
	786	4460.58	1654.23		3252	2480
	787	4287	1651.5		3202	2482
	788	5048.25	1651.9		2860	2485
	789	5124.74	1652.33		4031	2484
	790	4540.26	1653.62		1594	2488
	791	4655.35	1652.6		2804	2488
	792	4764.64	1652.5		2531	2490
	793	2683.68	1656		3152	2490
	794	4297.5	1655.5		3089	2492
	795	4358	1654		5855	2492
	796	4388.78	1658.81		6109	2493
	797	5073.34	1657.27		4814	2494
	798	2346.5	1658.13		1032	2495
	799	4279	1655.5		4130	2496
	800	4213	1657.5		6119	2496
	801	4494.9	1656.3		5410	2497
	802	4545.5	1657		3400	2498
	803	4647.15	1657.38		1795	2500
	804	4754.78	1658.14		3097	2501
	805	4891.15	1660.78		1244	2504
	806	2296	1658.64		2229	2504
	807	5043.09	1659.21		5918	2504
	808	1119.68	1660.03		2536	2504
	809	4259	1657.5		3086	2505
	810	5022.92	1662.69		1704	2507
	811	5131	1658		2827	2507
	812	1224.9	1660.7		980	2508
	813	4605.5	1662.32		4024	2508
	814	4297.5	1666.32		2262	2510
	815	4356	1661.5		1607	2510
	816	4445.6	1663.5		1539	2512
	817	5232.42	1667.73		2114	2513
	818	1113.24	1664.79		2435	2512
	819	2037.5	1663.65		3105	2513
	820	2376.7	1663.1		4460	2514
	821	4527.72	1666.33		593	2515
	822	4721.77	1665.35		3142	2516
	823	4904.34	1665.08		691	2518
	824	2773.17	1665.43		4137	2521
	825	4285.83	1664.61		5484	2521
	826	1120.93	1665.93		4322	2522
	827	2574	1665		3004	2524
	828	2690.37	1666.83		1694	2525
	829	4272	1668.5		1778	2524
	830	5408.57	1671.97		2099	2524
	831	1116.5	1669		5998	2525
	832	4563.77	1670.43		3260	2528
	833	4895.1	1672.23		830	2528
	834	4536.78	1675.06		4146	2529
	835	5239.33	1669.83		1080	2530
	836	2628.74	1674.02		5351	2530
	837	2776.9	1672.17		5520	2531
	838	2786.4	1675		5994	2532
	839	1345.83	1672.61		2218	2533
	840	2914.69	1678.31		710	2533
	841	4664.59	1673.05		1463	2534
	842	4722.54	1677.13		3945	2534
	843	2904.45	1677.81		4140	2535
	844	4788.96	1675.33		1345	2536
	845	5014	1674.2		4122	2537
	846	2322	1674.5		2842	2539
	847	5145.1	1674.3		3973	2538
	848	1389.5	1676.17		2124	2539
	849	1854.25	1677.15		3940	2539
	850	4288	1674.5		2102	2540
	851	4401.5	1679.5		2918	2540
	852	2715.5	1678		6540	2540
	853	5702.19	1680.94		590	2540
	854	4177	1676.5		717	2542
	855	4211.18	1684.39		1436	2543
	856	5479.94	1680.22		3834	2543
	857	4656	1678.25		1268	2545
	858	1082.17	1679.17		5590	2545
	859	1383.22	1680.38		3415	2547
	860	2320	1679.5		2261	2546
	861	4272	1679		674	2548
	862	4566.58	1681.09		1324	2548
	863	2632.78	1683.44		5120	2548
	864	2786.81	1683.38		6412	2548
	865	5008	1683		3315	2550
	866	2913.88	1685.75		4023	2551
	867	2922.68	1686.14		2498	2552
	868	2724.26	1687.38		1305	2555
	869	4552.38	1686.75		1324	2555
	870	4560.5	1686		3338	2555
	871	4576.58	1687.17		2982	2556
	872	4667.56	1688.47		3838	2557
	873	4731.41	1687.95		3864	2558
	874	2687.3	1692.12		1775	2559
	875	4687.04	1691.88		3265	2559
	876	4771	1686.5		6180	2560
	877	1393	1688		3944	2561
	878	4582	1691		4772	2561
	879	2308.34	1690.66		5049	2562
	880	2709.01	1694.99		5478	2563
	881	5517.44	1694.06		1631	2563
	882	4570.83	1691.61		1927	2564
	883	2000	1691.5		2859	2566
	884	4716.82	1697.62		2696	2567
	885	5105.45	1696.24		2925	2567
	886	2345.38	1696.75		500	2568
	887	2532.5	1696		1628	2568
	888	4380.21	1700.32		5335	2570
	889	4509.38	1696.75		2919	2571
	890	4728	1695.5		1529	2572
	891	4166.82	1700.76		4480	2572
	892	4369.5	1703.1		1587	2573
	893	4939.15	1698.73		1730	2573
	894	2267.83	1697.83		6163	2572
	895	4308.42	1703.12		1874	2576
	896	4176.98	1707.3		2985	2576
	897	4209	1699		3410	2576
	898	4327.72	1701.94		652	2576
	899	2888.99	1704.99		4210	2577
	900	4505	1702.5		4912	2577
	901	2296.5	1703		3114	2579
	902	4198	1703.5		3160	2580
	903	4522.23	1705.23		1511	2580
	904	4542.3	1701.9		2514	2582
	905	4711.25	1704.25		2368	2583
	906	1175.36	1704.5		3157	2583
	907	2340.25	1704.5		5232	2583
	908	4564.5	1706		2992	2584
	909	4319.86	1707.68		3061	2584
	910	4331.88	1707.75		5027	2584
	911	4601.82	1710.32		2380	2584
	912	4419.36	1713.66		1010	2586
	913	4377	1710.88		1914	2585
	914	1833.05	1713.95		2858	2586
	915	4130.5	1712.5		4482	2586
	916	4190	1710.5		4085	2588
	917	4557.67	1711.75		4127	2589
	918	4618.6	1713.69		3206	2591
	919	2258.12	1714		2068	2592
	920	4395.38	1713.38		4300	2593
	921	4523.33	1714.33		470	2594
	922	2229.5	1714		1430	2596
	923	5434.93	1717.68		6315	2595
	924	2701.5	1715.5		3254	2598
	925	2840.65	1716.5		6242	2598
	926	4553.1	1715.7		4066	2599
	927	4474	1717		3975	2600
	928	2238.94	1720.23		1900	2601
	929	2548.79	1720.21		1957	2601
	930	4169.46	1719.82		2010	2602
	931	2727.69	1721.16		1881	2604
	932	2788.72	1720.8		2901	2604
	933	2865.5	1718		598	2605
	934	4380.5	1718		2742	2605
	935	4917.89	1723.7		5367	2604
	936	4937.12	1720.69		774	2606
	937	2256	1719		4950	2606
	938	2797.03	1720.63		480	2609
	939	4350.71	1720.64		2010	2609
	940	2955.17	1719.83		3214	2608
	941	4177.5	1722.31		3343	2610
	942	4519	1719.5		3891	2610
	943	5027.36	1721.79		6484	2610
	944	4633.79	1724		1920	2611
	945	2846.5	1722		4982	2611
	946	4186.77	1727.7		601	2613
	947	4467.5	1722.5		3268	2613
	948	4717.36	1724.73		4849	2613
	949	4777.73	1723.12		5420	2613
	950	4344.02	1729.07		1342	2615
	951	4453.23	1727.37		1718	2618
	952	2805.98	1729.43		1808	2619
	953	2904.73	1728.99		2265	2618
	954	4397	1725.5		3272	2618
	955	4547.9	1730.22		2115	2620
	956	4880	1727.25		5850	2620
	957	2735	1726.5		4768	2621
	958	2793.5	1727		3071	2622
	959	4174.5	1728		4723	2622
	960	2223.7	1728.3		5185	2623
	961	2729.9	1728.5		2860	2626
	962	5030.17	1727.83		621	2627
	963	4504.7	1730.4		2363	2626
	964	4801.08	1730.25		4286	2627
	965	2553.25	1731.67		2777	2628
	966	2841.21	1733.69		6320	2628
	967	2857.5	1731.5		3337	2628
	968	4618.33	1732.08		1119	2631
	969	2455.77	1735.13		1209	2631
	970	2958.21	1732.07		2094	2632
	971	4778.94	1732.78		5607	2631
	972	5840.86	1733.59		1192	2632
	973	4318	1732		3021	2633
	974	4346.5	1733.5		4046	2633
	975	2912.84	1735.5		4287	2633
	976	1651.12	1735.27		5881	2635
	977	4123.73	1739.23		4790	2636
	978	4272.5	1738.32		1190	2638
	979	4790.3	1735.9		1762	2638
	980	2865	1739		2169	2638
	981	4434.24	1740.39		1847	2640
	982	4688.61	1740.87		1531	2640
	983	2926.5	1738.5		2178	2641
	984	4770	1738.79		6518	2640
	985	5986.79	1740.76		1018	2642
	986	1660.7	1740.7		1248	2642
	987	2062.5	1740		2438	2642
	988	4552.43	1741.7		3825	2642
	989	2521.43	1742.83		2062	2643
	990	4295.39	1742.28		4580	2643
	991	4411.09	1744.45		5570	2643
	992	2976.41	1749.36		6103	2644
	993	1846.96	1745.65		2388	2645
	994	4594.5	1744		4053	2647
	995	1068.13	1747.2		4127	2649
	996	1668.79	1745.07		1024	2650
	997	4413.97	1747.73		3069	2650
	998	4433.77	1749.62		1444	2651
	999	4642.29	1747.64		3134	2651
	1000	1076.2	1748.2		2632	2652
	1001	4149.17	1746.83		3891	2652
	1002	4269.76	1749.82		4709	2652
	1003	4986	1748		917	2654
	1004	2753.14	1752.09		3459	2654
	1005	5146	1748		2998	2656
	1006	2635.96	1751.12		3878	2656
	1007	2871.83	1752.02		1887	2656
	1008	4588	1749		2404	2657
	1009	4783.7	1749.1		2654	2656
	1010	4636.12	1752		2978	2656
	1011	5238.14	1755.9		2986	2657
	1012	2838.17	1753.17		6632	2656
	1013	2510.96	1753.27		1596	2658
	1014	4291.5	1754		1605	2658
	1015	4557.67	1755.39		2098	2659
	1016	6166.39	1754.17		2318	2658
	1017	2387.9	1755.97		611	2660
	1018	4374	1754		1853	2660
	1019	4687.93	1757.21		3106	2662
	1020	4774.17	1755.17		3841	2662
	1021	4843.5	1758.92		4016	2663
	1022	2249.8	1756.7		5409	2663
	1023	2600.29	1759.43		6651	2663
	1024	4739.81	1760.25		2194	2665
	1025	4634	1756.5		1620	2666
	1026	2179.39	1759.24		3439	2666
	1027	2797	1762.61		3462	2666
	1028	4330.41	1760.05		5802	2666
	1029	5641.1	1760.56		6608	2666
	1030	2170.23	1763.81		3322	2667
	1031	2544	1759		1860	2669
	1032	2653.86	1761.23		4470	2669
	1033	4162.2	1762.93		916	2670
	1034	4569.81	1763.31		2794	2670
	1035	1142	1760.5		3902	2670
	1036	2846.33	1761.17		3150	2672
	1037	5271.81	1767.99		5464	2672
	1038	2606	1763.5		643	2672
	1039	5384.54	1768.87		1486	2674
	1040	5116.9	1765.3		1912	2674
	1041	2298	1767		3318	2675
	1042	2380.79	1767.15		3305	2676
	1043	4146.02	1769.88		1376	2677
	1044	2118.85	1770.19		2276	2676
	1045	1546.94	1770.78		2331	2678
	1046	2675.02	1774.33		2935	2678
	1047	2778.11	1773.93		649	2679
	1048	4701.5	1769.83		2978	2680
	1049	2105	1771		559	2682
	1050	4488.96	1773.19		4264	2682
	1051	4730.17	1771.17		3032	2683
	1052	1121.94	1775.13		3152	2682
	1053	2897.5	1774		2694	2684
	1054	4642.11	1777.61		2318	2685
	1055	5115	1772		3802	2684
	1056	2289.64	1774.88		1425	2687
	1057	2997.64	1774.86		2046	2686
	1058	4967.38	1775.15		2624	2687
	1059	5402	1775.33		5142	2687
	1060	5453.5	1774		4308	2688
	1061	2559.93	1777.21		618	2689
	1062	3008.26	1780.69		3196	2690
	1063	1816	1780.92		934	2692
	1064	2977.5	1777.75		3104	2692
	1065	2112.79	1778.92		5749	2692
	1066	2650.93	1781.2		1569	2693
	1067	5896.83	1778.17		2246	2693
	1068	4995.62	1786.27		2824	2693
	1069	2322.85	1786.38		5742	2693
	1070	4375	1783.77		2056	2694
	1071	4430.31	1782.62		5112	2694
	1072	4960.33	1782		2812	2695
	1073	2509.75	1782		3355	2695
	1074	4199.25	1782		3931	2695
	1075	4505.7	1783.5		3082	2696
	1076	5401	1782.5		3451	2696
	1077	2800.94	1787.16		1724	2697
	1078	4384.5	1782		2256	2697
	1079	5052.67	1784		938	2697
	1080	1569.19	1785.04		1069	2698
	1081	1953.07	1787.18		1745	2698
	1082	2999.5	1783		5116	2698
	1083	4536.99	1786.65		2156	2698
	1084	1169.35	1788.46		4514	2698
	1085	2905.83	1784.17		2746	2700
	1086	6212.53	1786.7		1020	2702
	1087	4291.08	1792.8		2888	2702
	1088	4560	1792.5		6514	2703
	1089	2488.54	1791.67		3092	2704
	1090	2510.1	1789.3		3400	2704
	1091	4801.36	1791.32		4840	2704
	1092	4258.05	1793.4		463	2705
	1093	5776.98	1792.55		4868	2706
	1094	5218.61	1792.17		2165	2709
	1095	5435.24	1793.79		3074	2709
	1096	2394.5	1792		1538	2710
	1097	4390.61	1795.35		2187	2710
	1098	2332	1792.5		5141	2710
	1099	4375	1794.6		6544	2710
	1100	4623.56	1796.67		1058	2712
	1101	5139.31	1799.12		1749	2712
	1102	5032	1795.5		3825	2711
	1103	3003	1796.5		1698	2713
	1104	4109.38	1800.69		1302	2714
	1105	4557.79	1801		3070	2714
	1106	4737.08	1801.38		4438	2715
	1107	5512.02	1801.98		1684	2716
	1108	2689.07	1805.36		2696	2716
	1109	5532	1798.5		4812	2717
	1110	2491.62	1802.56		678	2718
	1111	2619.5	1801.5		713	2718
	1112	4132.23	1803.14		2570	2719
	1113	4255.61	1802.06		3166	2719
	1114	4264.17	1801.17		1814	2720
	1115	4283.36	1802.43		2047	2720
	1116	1405.66	1805.22		2944	2720
	1117	2878.21	1806.74		1067	2721
	1118	4786.83	1808.06		3878	2721
	1119	4602.79	1805.79		4800	2721
	1120	5505.67	1805.67		1916	2722
	1121	2986.04	1810.04		3388	2722
	1122	1829.08	1808.34		4968	2722
	1123	2621.5	1807		5531	2722
	1124	4321.83	1810.5		491	2723
	1125	2683.45	1812.45		1556	2723
	1126	2297.67	1810.33		2920	2724
	1127	4131	1809.5		2836	2725
	1128	4430.5	1809.86		6162	2725
	1129	2791.71	1817.24		2406	2726
	1130	4665.34	1813.8		1653	2727
	1131	4715.34	1813.98		5134	2727
	1132	5183.44	1812.67		6144	2726
	1133	2217.05	1811.41		1454	2728
	1134	4543.6	1812.5		2058	2729
	1135	2305.3	1817.37		2624	2729
	1136	4425.8	1814.8		2642	2729
	1137	4574.5	1814.5		3915	2730
	1138	2747.06	1820.97		4924	2730
	1139	5011.21	1819.35		4988	2730
	1140	2547.94	1819.12		5061	2730
	1141	5369.74	1820.81		1162	2731
	1142	5184.31	1820.77		1294	2731
	1143	2296.33	1820.5		1646	2731
	1144	4392.98	1823.82		1815	2730
	1145	5548.95	1825.39		3996	2731
	1146	4482.33	1825.62		4075	2731
	1147	4899.61	1824.33		5566	2731
	1148	2711.43	1826.03		2536	2732
	1149	4650.33	1823.67		3399	2732
	1150	2479.12	1830.47		3890	2732
	1151	4663.59	1828.24		1558	2733
	1152	2550.5	1826.75		3105	2733
	1153	3011.59	1830.56		1868	2734
	1154	2570	1827		1433	2735
	1155	4646.38	1827.38		2691	2734
	1156	2804.5	1829.12		2944	2735
	1157	5642.69	1831.25		502	2736
	1158	1869.29	1831.71		516	2737
	1159	2292	1831		2171	2736
	1160	4539.73	1834.62		3069	2736
	1161	6128.52	1836.83		6443	2738
	1162	2618.79	1835.79		4678	2740
	1163	4566	1835.5		2331	2740
	1164	5069.83	1836.37		2640	2740
	1165	2880	1835.5		4012	2740
	1166	4083	1835		865	2742
	1167	4259	1835		1396	2743
	1168	2428.86	1840.82		2974	2744
	1169	2810.88	1841.28		1238	2745
	1170	3016.33	1837.67		1647	2746
	1171	925	1838		2171	2746
	1172	5909.5	1838		5873	2746
	1173	4081.5	1840.5		1816	2747
	1174	4485.19	1841.38		1852	2747
	1175	4508.71	1841.75		2980	2748
	1176	4668.04	1841.81		4206	2748
	1177	2969.43	1847.94		5880	2748
	1178	4091.61	1848.08		3877	2750
	1179	2576	1844		4034	2750
	1180	2887	1844		1640	2750
	1181	1874.33	1845.67		816	2752
	1182	1187.8	1848.8		1524	2752
	1183	1405.64	1846.57		4926	2753
	1184	1953.98	1850.53		5107	2754
	1185	2671.45	1850.03		1219	2754
	1186	6083.85	1849.02		4875	2755
	1187	4873.39	1849.61		636	2756
	1188	2402.93	1852.17		642	2756
	1189	4175.36	1850.07		1768	2756
	1190	4184.96	1854.14		3995	2756
	1191	1399.5	1851		1391	2758
	1192	4854.07	1853.57		1841	2759
	1193	6078.5	1850		2910	2758
	1194	3062.92	1857.08		3867	2759
	1195	4229.07	1857.24		674	2760
	1196	4681.3	1851.3		754	2760
	1197	5573.95	1853.08		1522	2760
	1198	1451.5	1852		2677	2760
	1199	3013.38	1859.26		2828	2760
	1200	4152.2	1855.43		1225	2760
	1201	4741.32	1855.59		1852	2761
	1202	4468.67	1855.25		3008	2761
	1203	4868.18	1855.08		3391	2760
	1204	1956.18	1857.94		3906	2762
	1205	2832.88	1860.29		1438	2763
	1206	4536.83	1853.83		2098	2763
	1207	4910.72	1855.83		2395	2762
	1208	6073.94	1857.77		2901	2762
	1209	4602.67	1858		5231	2763
	1210	2758.88	1862.95		4802	2764
	1211	2862.32	1860.91		3972	2765
	1212	4435.07	1863.19		6704	2764
	1213	4842.5	1858		1178	2766
	1214	1873.5	1860		1785	2766
	1215	4293.17	1866.52		4366	2766
	1216	4612.97	1862.83		1845	2767
	1217	6230.15	1862.65		530	2768
	1218	4302.1	1867.88		2780	2768
	1219	6250.5	1861		3044	2768
	1220	2797.12	1865.69		3831	2768
	1221	4838.32	1863.41		4056	2768
	1222	1942.5	1863.5		4313	2768
	1223	2501.48	1872.88		1115	2770
	1224	4144.38	1866.5		1607	2770
	1225	5289.62	1865.38		642	2770
	1226	4323.6	1872.08		1752	2770
	1227	4328.5	1868.28		3199	2771
	1228	6021.98	1869.78		3250	2771
	1229	1876.44	1869.56		3818	2771
	1230	4385.6	1869.7		3906	2771
	1231	5300.63	1874.48		5564	2770
	1232	4963.75	1874.4		1839	2772
	1233	4559.09	1876.28		2282	2772
	1234	4577.68	1875.09		1774	2773
	1235	4398	1875.83		3160	2773
	1236	2861.6	1878.33		4084	2772
	1237	4441.28	1878.39		2980	2774
	1238	4381.5	1875.75		3006	2774
	1239	1333.5	1876		2518	2774
	1240	1885.5	1876		2990	2775
	1241	2622.25	1877.62		593	2776
	1242	4175.42	1878.04		2576	2776
	1243	4415.37	1878.67		3052	2776
	1244	5463.31	1879.27		1337	2777
	1245	3050	1877.5		2582	2777
	1246	4130.5	1877		3251	2776
	1247	4487.5	1877		2287	2778
	1248	1667.46	1880.54		3366	2778
	1249	4207.14	1881.07		1804	2779
	1250	4847.85	1880.91		2278	2779
	1251	4160	1881.33		2373	2779
	1252	4690.33	1880.67		2904	2778
	1253	4761	1880		3162	2779
	1254	4825.81	1881.75		3890	2779
	1255	1802.03	1882.23		4784	2779
	1256	4489.32	1882.05		602	2780
	1257	2563.5	1882.5		2212	2780
	1258	4521.85	1886.19		3813	2780
	1259	4375.83	1884.33		406	2781
	1260	1912	1887		1451	2780
	1261	1976.83	1885.17		1731	2782
	1262	2650.02	1889.79		2997	2782
	1263	2879.5	1885		4601	2782
	1264	3070.29	1888.86		1324	2783
	1265	4088.5	1885		1774	2783
	1266	4096.01	1890.78		2202	2782
	1267	4269.8	1887.25		3848	2783
	1268	4517	1885.8		1892	2784
	1269	4533.43	1885.64		3445	2784
	1270	4692.9	1887.55		3470	2784
	1271	4888.5	1885		4074	2784
	1272	5183.64	1887.27		1741	2784
	1273	6024.43	1885.77		3130	2785
	1274	2568.17	1885.83		5353	2784
	1275	2729.8	1896.38		661	2786
	1276	4150.21	1887.79		3819	2786
	1277	4196.76	1890.76		2066	2788
	1278	4475.29	1891.65		428	2789
	1279	1355.35	1889.95		912	2789
	1280	4631.79	1893.11		1809	2788
	1281	5216.17	1888.83		1964	2788
	1282	4312.84	1893.68		768	2790
	1283	4247.25	1893		835	2791
	1284	4576.86	1899.1		2912	2791
	1285	1637.52	1898.8		3238	2791
	1286	4982.18	1898.65		3985	2791
	1287	5709.74	1896.1		4012	2791
	1288	4373.15	1896.91		4069	2791
	1289	3022.64	1898.59		4314	2790
	1290	2774.1	1898.3		438	2792
	1291	3080.43	1903.87		1040	2792
	1292	4347.81	1902.81		3952	2794
	1293	2787.17	1903.61		6207	2794
	1294	3029.44	1903.38		2838	2795
	1295	4390.72	1906.94		3006	2794
	1296	5364.32	1905.68		3185	2794
	1297	2492	1903		4146	2796
	1298	2662.5	1903.75		890	2797
	1299	3019.04	1907.12		1389	2797
	1300	4442.73	1906.73		1687	2796
	1301	4326.3	1905.1		2239	2797
	1302	2297.25	1906		4944	2798
	1303	2799.3	1910.35		5005	2798
	1304	4316.03	1911.67		1344	2799
	1305	5334.08	1910.23		2850	2799
	1306	2408.09	1914.37		5943	2798
	1307	3032.27	1908.73		1572	2800
	1308	4065.86	1913.57		3214	2801
	1309	2788	1909.5		2274	2802
	1310	4734.39	1914.39		1050	2804
	1311	2650.77	1914.66		1349	2804
	1312	4338.5	1911		3390	2804
	1313	4225.27	1916.59		3932	2804
	1314	4419.31	1915.83		1152	2808
	1315	4612.86	1913.14		1600	2808
	1316	5402.76	1915.53		3369	2808
	1317	980	1912.5		3472	2808
	1318	2941.17	1915.7		5064	2808
	1319	4446.58	1915.17		2096	2809
	1320	5087.83	1919.43		2210	2810
	1321	4956.6	1916.2		5219	2810
	1322	2295	1914.5		1569	2810
	1323	3100.97	1917.7		3229	2810
	1324	4249.14	1918.38		3240	2811
	1325	4334.7	1915.7		5024	2811
	1326	4347.23	1917.37		2804	2812
	1327	4365.4	1919.39		5939	2812
	1328	2419	1916.5		2127	2813
	1329	4606.22	1919.78		2546	2814
	1330	2252.85	1920.98		2565	2814
	1331	4094.15	1926.34		4926	2814
	1332	4290.18	1925.21		1230	2815
	1333	4722.9	1920.17		2827	2815
	1334	4183.6	1925.71		3473	2815
	1335	2528.7	1923.2		1348	2817
	1336	4552.1	1923.1		1916	2816
	1337	2238.76	1927.39		2427	2818
	1338	2907.02	1927.12		2439	2818
	1339	4463.89	1926.06		4143	2818
	1340	4408.71	1928		1635	2819
	1341	5195.3	1929.6		2498	2819
	1342	5515.44	1927.53		1384	2820
	1343	2408.47	1928.06		1708	2820
	1344	4784.59	1926.5		2988	2820
	1345	2243.81	1928.69		763	2821
	1346	3055.79	1930.46		1695	2821
	1347	4733.04	1928.79		3478	2821
	1348	5426.84	1933.22		1475	2822
	1349	2503.08	1930.5		2487	2822
	1350	4690.92	1931.5		2942	2822
	1351	4580.56	1932		1411	2822
	1352	2251.41	1931.14		4098	2822
	1353	5687.79	1932.29		3863	2824
	1354	4513.14	1936.62		4801	2824
	1355	4564.35	1934.69		384	2825
	1356	2232.64	1933.07		1156	2826
	1357	2403.43	1936.32		1383	2826
	1358	4042.82	1936.18		2743	2826
	1359	2531.59	1933.86		4542	2827
	1360	4142.25	1934.88		4021	2828
	1361	1207.5	1935		4833	2828
	1362	1420.1	1936.4		382	2829
	1363	4178	1934.5		4730	2829
	1364	2122.73	1941.59		1706	2831
	1365	3028.26	1942.01		3456	2831
	1366	4251.71	1939.75		3883	2831
	1367	5003.02	1939.31		934	2832
	1368	1440.5	1938		1164	2832
	1369	2979.14	1939.23		3772	2832
	1370	1526.14	1940.45		4551	2832
	1371	4383.4	1940.4		5398	2832
	1372	2234.83	1939.83		1985	2833
	1373	2506.42	1941.33		2399	2832
	1374	2907.5	1941.25		2485	2832
	1375	4745.27	1943.88		4402	2833
	1376	2453.65	1944.27		1203	2834
	1377	4695.69	1945.38		3986	2833
	1378	2853.42	1948.58		4073	2834
	1379	4332.17	1949.17		6191	2834
	1380	4797.73	1947.5		1838	2835
	1381	2258.68	1949.09		3510	2835
	1382	2400.8	1947.2		1266	2836
	1383	1264.3	1947.1		2538	2836
	1384	1425	1946.5		2975	2836
	1385	4125.77	1948.14		4704	2836
	1386	4569.79	1949.55		1352	2837
	1387	4820	1948.5		1608	2837
	1388	5098	1947.5		3133	2836
	1389	6078.5	1948		5914	2837
	1390	2877.87	1958.93		576	2838
	1391	3067.41	1952.54		586	2838
	1392	4444.31	1953.54		1444	2838
	1393	2455	1950		1986	2838
	1394	2957.06	1952.81		4698	2838
	1395	2663.67	1954.54		614	2839
	1396	2831.7	1952.2		618	2839
	1397	5097.07	1951.79		770	2839
	1398	1538.09	1955.33		793	2838
	1399	4612.28	1955.63		1505	2840
	1400	4177.6	1958.02		2663	2840
	1401	2455	1954		4436	2839
	1402	4786.7	1958.36		2137	2840
	1403	1632.5	1955.86		3923	2841
	1404	2255.07	1959.46		1336	2842
	1405	2558.21	1958.56		1822	2842
	1406	4594.55	1960.3		1762	2844
	1407	4777.14	1959.77		2125	2843
	1408	2646	1956.5		4679	2843
	1409	4402.15	1961.8		634	2845
	1410	4041.21	1961.38		1767	2844
	1411	4380.74	1962.74		972	2845
	1412	4518.7	1959.3		1552	2847
	1413	4290.2	1963.11		3381	2846
	1414	4662.14	1960.5		1596	2847
	1415	4793.92	1961.17		1605	2846
	1416	4935.6	1961.95		3006	2847
	1417	1208.24	1963.86		4044	2847
	1418	4455.65	1965.05		1304	2848
	1419	2773.7	1969.03		894	2849
	1420	2963.68	1968.47		3994	2848
	1421	4320	1963.5		1368	2850
	1422	4846.29	1967.61		1842	2850
	1423	1650.4	1966.2		3481	2850
	1424	2216.92	1968.08		3491	2850
	1425	2251.79	1966.73		722	2851
	1426	2578.99	1972.38		1106	2851
	1427	2560.5	1968.5		2918	2850
	1428	4771.74	1970.6		3378	2850
	1429	1982.86	1969.14		3922	2852
	1430	2619.64	1971.09		656	2852
	1431	2492.64	1970.07		1777	2853
	1432	4569.7	1969.7		4549	2853
	1433	4714.22	1972.17		422	2854
	1434	5476.59	1971.99		1476	2854
	1435	6231.89	1971.04		3511	2854
	1436	4630.17	1970.17		1441	2854
	1437	4992.72	1973.91		1725	2855
	1438	5393.41	1973.53		2834	2854
	1439	2153.5	1972		4123	2855
	1440	3045.22	1978.08		2656	2856
	1441	4548.14	1972.64		1364	2857
	1442	4634.83	1973.17		1468	2857
	1443	4741.13	1972.91		1954	2858
	1444	6225.32	1973.95		1450	2859
	1445	3165.94	1973.72		1506	2859
	1446	4340.09	1979.65		1736	2858
	1447	4650.07	1976.77		2802	2858
	1448	1968.5	1974		3133	2859
	1449	1979.72	1976.76		854	2860
	1450	2253.22	1975.56		1309	2860
	1451	961.433	1976.83		1373	2860
	1452	4446.83	1976.28		2030	2860
	1453	4527.98	1978.76		4536	2860
	1454	4605.32	1978.63		950	2860
	1455	5528	1975.5		3201	2861
	1456	2356.53	1982.39		412	2862
	1457	2890.38	1983.5		6362	2862
	1458	2624	1979		839	2863
	1459	2629.9	1981.43		2551	2863
	1460	2787.2	1983.25		3451	2862
	1461	4044.57	1985.2		3480	2862
	1462	4633.77	1981.77		4667	2863
	1463	3168.9	1981.7		6249	2863
	1464	4477.08	1984.08		3431	2864
	1465	4528.69	1985.27		1546	2866
	1466	4969.34	1986.05		2538	2866
	1467	4223.36	1985.79		828	2866
	1468	4280.83	1983.5		1372	2866
	1469	4326.1	1984.7		1433	2867
	1470	4404.88	1987.98		2166	2867
	1471	4759.85	1987.85		3038	2867
	1472	4360.55	1990.53		4132	2867
	1473	4413.89	1989.45		4866	2867
	1474	2710.01	1991.73		630	2868
	1475	3139.83	1986.5		1306	2868
	1476	4470.5	1986		1385	2868
	1477	5010.33	1986.67		1719	2868
	1478	5472.03	1989.24		1741	2868
	1479	4318.24	1992.05		854	2869
	1480	4438	1987		1696	2868
	1481	4078.62	1992.92		2712	2869
	1482	4247.29	1993.43		4313	2870
	1483	4368.39	1990.28		1194	2871
	1484	2858.21	1994.54		1260	2871
	1485	6251.59	1990.68		2196	2871
	1486	1058.1	1993.2		1438	2872
	1487	3123.07	1993.21		3868	2872
	1488	4434.17	1991.17		1506	2873
	1489	4556.35	1992.88		1714	2873
	1490	5109.29	1994.86		3801	2873
	1491	5120.39	1999.91		958	2874
	1492	2095.68	1996.96		1410	2874
	1493	2658.22	1995.5		3424	2874
	1494	2988.61	1994.28		621	2876
	1495	2957.65	1998.35		1402	2876
	1496	4154	1999.15		2710	2876
	1497	4292.95	1997.77		6335	2876
	1498	4756.09	1996.32		474	2877
	1499	4324.9	1996.3		1779	2877
	1500	2391.89	2001.77		2145	2876
	1501	2649.15	2001.31		2452	2877
	1502	2917.21	2001.96		926	2878
	1503	4029	1997		1793	2877
	1504	2848.55	2002.35		3931	2878
	1505	2992.88	2001.93		1707	2880
	1506	3064.07	2003.37		3483	2879
	1507	4197.17	2002.1		1111	2880
	1508	4354.27	2003.09		2844	2880
	1509	4368.96	2004.53		3942	2880
	1510	4548.59	2001.14		2585	2882
	1511	4664	1999		2062	2883
	1512	4064	2000		3098	2883
	1513	4240.5	2004.78		4128	2882
	1514	4307.43	2002.14		976	2885
	1515	4412	2002		1401	2884
	1516	4554.5	2000		1533	2885
	1517	876.833	2001.17		2107	2885
	1518	4083.46	2006.57		2146	2886
	1519	4112.5	2005.43		2278	2886
	1520	4380.03	2008.78		2466	2886
	1521	1024.5	2002.5		6254	2886
	1522	4026.17	2002.5		2152	2887
	1523	4269.77	2004.43		595	2888
	1524	4556.89	2003.81		1597	2888
	1525	4669.31	2005.12		2968	2888
	1526	4948.85	2005.54		3370	2888
	1527	2682	2003.5		3814	2888
	1528	3089.83	2007.17		1557	2888
	1529	1954.59	2005.23		2216	2888
	1530	2089	2003.5		6005	2889
	1531	2662.96	2005.5		6142	2889
	1532	2839.36	2009.57		348	2890
	1533	4246.87	2011.3		4041	2890
	1534	5084.9	2012.07		482	2890
	1535	4061.82	2008.39		912	2891
	1536	5126	2005		1367	2891
	1537	5663.28	2008.45		2425	2891
	1538	2092.08	2008.62		3124	2891
	1539	2455.03	2009.23		4193	2890
	1540	4771.58	2010.22		5086	2891
	1541	5876.19	2007		1400	2892
	1542	6230.65	2007.45		2311	2892
	1543	1903.44	2007.62		2782	2892
	1544	4323.17	2010.88		3909	2892
	1545	5103.15	2012.64		1270	2892
	1546	1897	2008		2450	2893
	1547	1918	2008		2645	2893
	1548	2778.17	2008.5		4250	2892
	1549	4656.83	2010.93		561	2894
	1550	4684.45	2009.4		920	2894
	1551	2963.9	2010.83		1287	2894
	1552	3027.37	2011.57		1405	2894
	1553	4227	2009		1870	2894
	1554	4327.97	2013.65		2146	2894
	1555	4445.17	2010.9		2389	2894
	1556	5179.68	2010.41		2417	2894
	1557	4197.27	2015.05		4005	2894
	1558	4350.17	2010.83		4502	2895
	1559	4814.17	2011.17		5155	2895
	1560	4464.74	2014.93		2282	2896
	1561	4871.7	2017.65		2326	2896
	1562	2936.17	2016.88		5030	2896
	1563	4424.39	2016.44		4148	2897
	1564	2163.55	2016.83		3010	2898
	1565	2987.07	2020.7		6402	2898
	1566	4315.1	2017.23		2272	2898
	1567	4879.77	2017.77		4740	2898
	1568	2237	2015		1665	2900
	1569	2806.24	2018.89		2159	2900
	1570	3991.19	2021.99		373	2901
	1571	4479.64	2016.64		340	2902
	1572	4612	2015		961	2903
	1573	5858.86	2016.29		1183	2903
	1574	4981.81	2021.13		2762	2903
	1575	5139.08	2018.58		490	2904
	1576	2619.69	2020.83		1870	2904
	1577	2993.33	2017.67		2327	2904
	1578	4179.1	2017.7		2584	2904
	1579	6317.69	2019.57		2924	2904
	1580	1668.22	2021.27		2991	2904
	1581	4824.5	2021.5		3399	2904
	1582	2823.89	2021.54		971	2905
	1583	3173.41	2023		1072	2905
	1584	4364.17	2020.17		1114	2905
	1585	4438.32	2023.15		1744	2904
	1586	1369	2023.09		4131	2905
	1587	1704.1	2021.43		1059	2905
	1588	4064.55	2025.14		2450	2906
	1589	6325.38	2021.62		4426	2907
	1590	4177.9	2022.3		1172	2908
	1591	4756.03	2024.39		1923	2908
	1592	5262.84	2026.33		2713	2908
	1593	2334.39	2027.36		3335	2909
	1594	2733.38	2026.27		756	2910
	1595	4094.73	2026.64		1364	2910
	1596	4567.96	2025.35		1982	2910
	1597	4499.67	2026.83		3038	2910
	1598	5430.83	2024.67		4472	2910
	1599	1187.34	2026.66		5998	2911
	1600	4204.07	2029.37		462	2913
	1601	2163.26	2028.5		582	2912
	1602	4540.79	2029.14		2792	2913
	1603	2684.83	2030.3		688	2914
	1604	4169.77	2029.83		1375	2914
	1605	3046.81	2031.19		1741	2914
	1606	4031.2	2033.02		2481	2914
	1607	4557.33	2030.06		2840	2914
	1608	4626.17	2028.5		6154	2914
	1609	5498.33	2030.42		1389	2914
	1610	2876.86	2032.29		4217	2915
	1611	2959.72	2034.61		821	2916
	1612	4190	2030.12		1178	2916
	1613	4808.12	2030.79		1592	2916
	1614	4412.5	2032.08		2616	2916
	1615	2744.9	2032.3		457	2916
	1616	4047.64	2041.92		2146	2918
	1617	4544.09	2035.68		2980	2918
	1618	4578.53	2035.94		4450	2918
	1619	2608.83	2034.39		1275	2918
	1620	4344.67	2034.67		2763	2919
	1621	2140.81	2042.34		3139	2920
	1622	4267.68	2037.86		1398	2921
	1623	4304.89	2038.27		2858	2921
	1624	1200.56	2039.5		4842	2921
	1625	3156.98	2041.02		5363	2921
	1626	4727.36	2040.12		530	2922
	1627	2331.24	2042.31		569	2921
	1628	4114.55	2042.03		2313	2922
	1629	4610.1	2039.5		5802	2922
	1630	3193.93	2042.98		720	2923
	1631	4211.69	2043.46		1265	2923
	1632	4361.9	2039.3		2291	2922
	1633	4560.97	2044.06		2844	2923
	1634	2163	2043		3168	2923
	1635	2612	2042.5		437	2924
	1636	3143.23	2046		3213	2924
	1637	4193.62	2046.32		1286	2926
	1638	5943.36	2045.38		3085	2926
	1639	4535.65	2046.57		3165	2927
	1640	4098.41	2046.05		1367	2928
	1641	4235.39	2045.28		1388	2928
	1642	4357.5	2044.5		2864	2928
	1643	4415.21	2046.43		538	2928
	1644	4261.27	2048.64		965	2928
	1645	4298	2045.5		1229	2929
	1646	4462.27	2049.09		2177	2931
	1647	2657.59	2050.32		3776	2929
	1648	4365.14	2052.46		534	2930
	1649	2467.41	2053.5		1281	2930
	1650	4279.38	2051.74		2450	2930
	1651	2771.6	2050.8		3128	2930
	1652	6065.5	2050.5		4018	2930
	1653	6069.8	2051.63		1300	2931
	1654	1705.05	2053.2		1554	2931
	1655	4208.5	2053.22		2055	2931
	1656	4637.83	2053.17		3992	2931
	1657	2785.17	2050.83		4920	2931
	1658	4242.59	2055.18		4938	2931
	1659	4454.17	2052.17		1253	2932
	1660	4673.25	2053.19		1408	2932
	1661	5096.79	2055.71		569	2934
	1662	5316.73	2056.73		2406	2933
	1663	2888	2055.5		5645	2932
	1664	4234.67	2056.5		2762	2934
	1665	2162	2054.5		3332	2934
	1666	3103.41	2066.04		4715	2933
	1667	4217.85	2058.95		6176	2933
	1668	4533.7	2055.7		803	2935
	1669	4688.27	2057.27		1101	2935
	1670	4992.9	2059.79		2673	2935
	1671	2016.34	2057.66		2795	2935
	1672	2997.78	2061.12		529	2936
	1673	4330.23	2062.94		543	2936
	1674	6054.43	2056.9		927	2936
	1675	769.833	2057.17		4926	2936
	1676	2662.21	2059.85		5181	2936
	1677	2068.07	2060.64		1080	2937
	1678	3189.1	2061.1		1238	2936
	1679	4054.86	2062.38		6102	2937
	1680	4167.38	2064.83		6115	2936
	1681	2560.83	2063.83		658	2938
	1682	4712.64	2061.29		788	2938
	1683	3221.67	2060.33		3084	2938
	1684	2891.17	2062.5		3165	2938
	1685	4489	2062		2532	2939
	1686	4823.33	2065.83		2956	2939
	1687	4841.55	2064.18		3184	2939
	1688	2656.35	2068.06		3817	2939
	1689	4385	2065.88		635	2939
	1690	4951.53	2068.29		1314	2940
	1691	4408.28	2067.39		2930	2940
	1692	5138.57	2076.1		696	2942
	1693	4175.46	2069.46		986	2942
	1694	4190.41	2066.14		1255	2942
	1695	4297	2065		559	2944
	1696	3980.57	2068.97		916	2944
	1697	1933.83	2066.83		1707	2944
	1698	2616.5	2069		1992	2944
	1699	2404	2070.5		2061	2944
	1700	4649.1	2069.1		3180	2944
	1701	2165.17	2073.61		3312	2944
	1702	2465	2068.5		3840	2944
	1703	3081.5	2070		4533	2944
	1704	4835.5	2069		1310	2945
	1705	2888.1	2072.23		3254	2944
	1706	4193.81	2074.61		3784	2945
	1707	2240.17	2070.83		831	2946
	1708	3212.73	2076.08		6084	2946
	1709	4515	2073.33		800	2948
	1710	1837.5	2073		1876	2947
	1711	2595.29	2078.35		2184	2948
	1712	2708.5	2073		2328	2948
	1713	4467.17	2073.17		4129	2948
	1714	2939.41	2079.67		886	2949
	1715	2630.1	2075.3		894	2949
	1716	2812.72	2078.43		1298	2949
	1717	4071	2075.5		1718	2949
	1718	5495.4	2079.21		4465	2948
	1719	6132.5	2075		4926	2949
	1720	3085.5	2076		2061	2950
	1721	4018.55	2081.81		5641	2950
	1722	4778.04	2079.96		780	2951
	1723	1365.24	2079.37		3087	2950
	1724	2712.59	2078.77		4525	2950
	1725	5505.5	2077		5856	2950
	1726	2467	2078		991	2952
	1727	3196.78	2080.83		1910	2952
	1728	5040.83	2080.08		2293	2952
	1729	2410	2081		5497	2951
	1730	2631.93	2080.21		1388	2953
	1731	4381.94	2083.37		1997	2953
	1732	4606.3	2083.04		469	2954
	1733	2577	2081.86		3994	2954
	1734	2662.73	2083.41		4013	2955
	1735	2803.39	2086.36		6084	2954
	1736	5238.97	2084.44		6188	2954
	1737	1561.8	2085.8		2644	2955
	1738	4187.17	2081.17		338	2956
	1739	6196.67	2082.08		690	2955
	1740	4437.88	2084		724	2956
	1741	2867.84	2086.88		3753	2955
	1742	4168.5	2086		5734	2957
	1743	3114.12	2087.88		480	2958
	1744	4419.5	2084		647	2958
	1745	4574.68	2087.97		1373	2958
	1746	4582.12	2086.74		1708	2958
	1747	4817.04	2086.04		2179	2958
	1748	5129.76	2087.29		2769	2958
	1749	2817.62	2086.62		512	2959
	1750	4078.21	2088.68		1020	2959
	1751	4486.38	2087.15		2135	2958
	1752	1375.56	2086.83		611	2960
	1753	4788.76	2091.39		1648	2960
	1754	2559.93	2092.53		2254	2960
	1755	2579.66	2090.34		2272	2960
	1756	2917.22	2093.17		2557	2960
	1757	3233.17	2086.83		4451	2960
	1758	2059.35	2093.82		600	2961
	1759	4024.5	2093.42		1914	2961
	1760	2078.11	2091.65		2296	2961
	1761	2410	2090		3774	2960
	1762	4750.86	2093.73		467	2962
	1763	2634.65	2096.69		854	2962
	1764	3093.25	2092		2864	2962
	1765	4588	2093		2737	2963
	1766	1703.84	2094.71		3866	2963
	1767	2138.17	2091.83		1210	2964
	1768	4481.69	2093.5		1785	2964
	1769	1519.28	2097.64		6210	2964
	1770	2800.21	2093.79		688	2966
	1771	4286.86	2095.14		1086	2966
	1772	2247.5	2098.5		1770	2966
	1773	4148.67	2094.67		2263	2966
	1774	2581.25	2096.17		3967	2966
	1775	1269.85	2098.15		5934	2967
	1776	2727.5	2096		6190	2966
	1777	1330.67	2098		827	2968
	1778	1591.42	2100.04		2270	2966
	1779	2514.39	2098.06		2753	2966
	1780	3065.39	2100.76		3320	2967
	1781	4270.56	2099.89		1348	2968
	1782	5497.23	2099.31		4187	2968
	1783	1415.88	2098.81		5344	2968
	1784	4485.56	2100.31		843	2969
	1785	4146.17	2099.17		1719	2968
	1786	1440.43	2100.64		2514	2968
	1787	3012	2104.05		3284	2969
	1788	4464.14	2101.93		3750	2969
	1789	1283.5	2103.18		4080	2968
	1790	1342.65	2102.69		5744	2969
	1791	2785.33	2103.92		1358	2970
	1792	5357.68	2104.71		1386	2969
	1793	1757	2103.25		1689	2969
	1794	2748.86	2105.74		2328	2970
	1795	3163.65	2105.35		4392	2971
	1796	4133.4	2107.64		4616	2970
	1797	2801.83	2107.46		4907	2970
	1798	4776.74	2107.86		600	2971
	1799	1596.63	2106.03		1652	2971
	1800	2942.61	2108.45		2483	2970
	1801	4402.07	2109.46		3874	2971
	1802	4448.5	2105		4945	2971
	1803	4601.33	2106.67		1729	2971
	1804	4013.88	2109.36		2344	2972
	1805	4660.78	2108.66		2544	2972
	1806	2572.85	2112.08		3309	2972
	1807	4060.88	2111.55		530	2973
	1808	4411	2110		922	2972
	1809	4589.17	2109.08		5998	2973
	1810	2516.68	2115.3		562	2974
	1811	6080	2111.37		3204	2974
	1812	3988.42	2112.73		988	2976
	1813	2380.45	2117.21		1064	2975
	1814	3030.5	2113.89		4149	2975
	1815	3104.8	2117.06		2463	2976
	1816	1990.24	2115.46		2674	2976
	1817	4187	2113.5		1721	2976
	1818	4293.21	2114.93		1838	2976
	1819	4385.63	2116.77		3351	2977
	1820	2739.5	2117.5		3748	2977
	1821	4508.61	2117.67		4201	2976
	1822	4607.36	2116.07		1656	2978
	1823	2879	2116		4610	2978
	1824	4237.5	2116		6022	2978
	1825	4314.5	2120.33		1769	2979
	1826	4154.5	2118.3		2754	2978
	1827	2085.5	2118.33		3049	2979
	1828	2752.48	2126.94		3755	2978
	1829	2850.12	2123.69		4533	2978
	1830	2881.1	2120.3		784	2980
	1831	2965.82	2124.47		2329	2981
	1832	4350.45	2122.98		2845	2980
	1833	4420.41	2124.14		5802	2980
	1834	3981.12	2125.88		5882	2980
	1835	4281.8	2124.85		1182	2981
	1836	4449.5	2123.5		1260	2981
	1837	5052.98	2128.53		1293	2981
	1838	2593.82	2127.67		1398	2981
	1839	3052.14	2123.77		2627	2981
	1840	3214.41	2126.98		4282	2982
	1841	4288.67	2122.33		695	2982
	1842	4002	2122.5		1228	2982
	1843	5573.39	2126.79		1370	2982
	1844	2700.88	2127.12		2680	2982
	1845	2869.17	2124.83		5786	2982
	1846	2125.61	2127.11		6212	2981
	1847	2141.3	2126.7		918	2983
	1848	4465.74	2129.4		1475	2983
	1849	4716.77	2129.89		1732	2983
	1850	2288.6	2130.6		3316	2983
	1851	3008.27	2129.89		4393	2983
	1852	2765.58	2132.85		2228	2985
	1853	4125.44	2130.44		3396	2985
	1854	4311.9	2128.3		3970	2985
	1855	4452.64	2131.71		4883	2985
	1856	4178.62	2133		5832	2984
	1857	4444.29	2132.36		4574	2986
	1858	5231.8	2132.7		4900	2986
	1859	3020.06	2132.89		5138	2986
	1860	4137.98	2138.06		703	2987
	1861	4206.5	2135.26		927	2986
	1862	945.214	2133.68		1045	2987
	1863	3982.86	2137.64		1283	2987
	1864	4304.04	2138.22		1490	2987
	1865	5136.35	2138.05		2500	2988
	1866	1197.91	2133.98		4562	2988
	1867	2724.05	2135.6		357	2989
	1868	4276.46	2137.73		1370	2988
	1869	2705.91	2139.29		2152	2988
	1870	4337.46	2138.54		3448	2989
	1871	4535.5	2134		802	2990
	1872	1301.8	2136.4		1306	2990
	1873	1396.6	2136.79		2653	2990
	1874	3060.89	2139.2		2693	2990
	1875	3162.63	2137.3		504	2990
	1876	4145.9	2135.3		1847	2991
	1877	953	2136		2470	2991
	1878	2947.61	2142.31		2795	2991
	1879	2978.86	2137.32		3042	2991
	1880	3039.26	2141.34		4306	2990
	1881	4124.5	2137.5		4872	2990
	1882	4156.33	2139.67		1148	2991
	1883	2151.77	2139.39		3948	2992
	1884	2790.36	2139.86		5226	2992
	1885	4968.93	2144.01		2527	2993
	1886	4039.16	2145.23		4187	2993
	1887	4719.17	2137.83		972	2994
	1888	3159.59	2142.86		1045	2994
	1889	2974.35	2142.65		1528	2994
	1890	3141.75	2143.33		3085	2994
	1891	946	2140.5		3970	2994
	1892	1403.78	2143.11		4273	2994
	1893	2727	2142.67		574	2994
	1894	4055.98	2145.06		2706	2995
	1895	4605.09	2144		2844	2995
	1896	5104.17	2141.17		597	2996
	1897	5718.98	2143.41		2328	2996
	1898	2438.02	2147.36		4937	2996
	1899	2983	2142.5		6193	2996
	1900	4357.72	2144.94		378	2997
	1901	1435.93	2146.73		1155	2996
	1902	1765.5	2143.29		2382	2997
	1903	4707.93	2145.36		2653	2996
	1904	4259.1	2144.7		2884	2996
	1905	4560.5	2144		4393	2997
	1906	3038.32	2148.09		4987	2997
	1907	3966.9	2152.73		975	2998
	1908	5710.5	2145		1321	2998
	1909	4204	2149.19		1330	2998
	1910	4389.1	2148.63		2197	2998
	1911	2237.17	2146.83		3450	2998
	1912	2332.05	2150.35		5978	2998
	1913	2991	2146.5		2792	2999
	1914	5543.21	2149.41		3857	2998
	1915	4481.32	2149.05		4044	2999
	1916	1121.5	2149		1408	3000
	1917	5141.99	2154.13		1518	3000
	1918	2347	2151.5		1747	3000
	1919	4136.66	2154.92		4214	3000
	1920	4258	2150.5		1202	3001
	1921	5273.97	2155.43		1571	3001
	1922	5572.5	2151		1988	3001
	1923	6109.98	2152.62		2224	3000
	1924	1169.42	2155.89		3958	3000
	1925	1309.79	2152.79		4134	3001
	1926	4370.88	2155.25		4494	3001
	1927	4500.94	2154.88		1011	3002
	1928	4732.83	2153.5		1552	3002
	1929	4757.03	2156.15		2157	3002
	1930	4528	2157.57		2708	3002
	1931	2405.04	2161.36		3176	3002
	1932	4233.62	2156.25		6305	3002
	1933	5538	2154.5		957	3002
	1934	1711.59	2157.76		2814	3003
	1935	2333.5	2157		2890	3002
	1936	4381.3	2158.65		1044	3004
	1937	2245.29	2158.71		4390	3004
	1938	4343.56	2160.5		890	3004
	1939	4473.85	2159.03		1195	3005
	1940	4678.21	2160.61		3072	3004
	1941	5970.15	2157.91		1508	3006
	1942	2348.25	2159.25		1752	3006
	1943	2794.38	2160.25		2330	3006
	1944	2898.1	2159.3		2525	3006
	1945	3144.96	2163.67		2702	3006
	1946	3166.62	2160.75		3928	3006
	1947	1531.08	2163.46		626	3007
	1948	4450.33	2164.67		1993	3006
	1949	4583.8	2161.8		4198	3007
	1950	4608.19	2165.06		710	3008
	1951	6190.29	2163.07		822	3008
	1952	5074.72	2166.37		2936	3008
	1953	2487.86	2164.29		2973	3008
	1954	4283.39	2164.28		3281	3008
	1955	4321.97	2166.97		3746	3008
	1956	4414.98	2166.12		3858	3008
	1957	1908.68	2166.27		5230	3008
	1958	2794.72	2169.45		912	3009
	1959	3283.17	2163.83		1372	3008
	1960	4460.09	2167.83		1538	3008
	1961	2321.35	2166.89		1727	3009
	1962	4729.65	2169.8		1762	3008
	1963	4790.93	2170.21		473	3010
	1964	5804.62	2167.34		1363	3011
	1965	2248	2166		2149	3012
	1966	4741.03	2170.03		6339	3010
	1967	4987.77	2167.95		1178	3012
	1968	2799	2168		1768	3012
	1969	4194.73	2171.95		2914	3012
	1970	1534	2168.5		4335	3012
	1971	1892.5	2169		6132	3012
	1972	4022.52	2173.99		635	3012
	1973	4281.1	2169.7		1440	3013
	1974	2846.7	2170.3		2449	3013
	1975	4489.89	2172.27		2476	3012
	1976	6135	2169.5		2859	3013
	1977	4048.35	2176.12		2966	3013
	1978	4439.5	2171		4056	3012
	1979	4617.79	2171.79		4079	3013
	1980	1750.02	2174.14		4307	3012
	1981	3143.97	2175.15		2241	3014
	1982	3285	2174		2367	3014
	1983	4263.97	2174.91		4211	3014
	1984	4319.81	2174.96		1375	3015
	1985	4636.9	2174.9		2252	3014
	1986	797.194	2177.99		3858	3015
	1987	4175.37	2176.43		1022	3016
	1988	1538.5	2175		2466	3016
	1989	4594	2177.23		4236	3016
	1990	911.167	2176.61		2636	3017
	1991	3222.54	2183.22		2794	3017
	1992	2789.62	2181.18		3436	3018
	1993	4068.22	2181		3746	3018
[truncated: 104,709 more rows]
